# Supplementary material
Source: publisher site journal article supplement (https://www.spandidos-publications.com/843/downloadSupplementary)
Supplement: Supplementary file 1 [file downloadSupplementary]

## Sheet: data_bcr_clinical_data_patient
Table SI. The clinical information used in the study was downloaded from the cBioPortal database (https://www.cbioportal.org/).
PATIENT_ID	FORM_COMPLETION_DATE	HISTOLOGICAL_DIAGNOSIS	PROSPECTIVE_COLLECTION	RETROSPECTIVE_COLLECTION	SEX	TUMOR_SITE	RACE	ETHNICITY	LATERALITY	HISTORY_OTHER_MALIGNANCY	PRIMARY_SITE_PATIENT	LOCATION_LUNG_PARENCHYMA	INITIAL_PATHOLOGIC_DX_YEAR	METHOD_OF_INITIAL_SAMPLE_PROCUREMENT	METHOD_OF_INITIAL_SAMPLE_PROCUREMENT_OTHER	RESIDUAL_TUMOR	AJCC_STAGING_EDITION	AJCC_TUMOR_PATHOLOGIC_PT	AJCC_NODES_PATHOLOGIC_PN	AJCC_METASTASIS_PATHOLOGIC_PM	AJCC_PATHOLOGIC_TUMOR_STAGE	AJCC_NODES_CLINICAL_CT	AJCC_NODES_CLINICAL_CN	AJCC_METASTASIS_CLINICAL_CM	AJCC_CLINICAL_TUMOR_STAGE	PULMONARY_FUNCTION_TEST_INDICATOR	FEV1_PERCENT_REF_PREBRONCHOLIATOR	FEV1_PERCENT_REF_POSTBRONCHOLIATOR	FEV1_FVC_RATIO_PREBRONCHOLIATOR	FEV1_FVC_RATIO_POSTBRONCHOLIATOR	CARBON_MONOXIDE_DIFFUSION_DLCO	KRAS_GENE_ANALYSIS_INDICATOR	KRAS_MUTATION	KRAS_MUTATION_IDENTIFIED_TYPE	MUTATION_STATUS	MUTATION_TYPE	ALK_TRANSLOCATION_STATUS	ALK_ANALYSIS_TYPE	TOBACCO_SMOKING_HISTORY_INDICATOR	HISTORY_NEOADJUVANT_TRTYN	SMOKING_YEAR_STARTED	SMOKING_YEAR_STOPPED	SMOKING_PACK_YEARS	KARNOFSKY_PERFORMANCE_SCORE	VITAL_STATUS	ECOG_SCORE	PERFORMANCE_STATUS_TIMING	RADIATION_TREATMENT_ADJUVANT	PHARMACEUTICAL_TX_ADJUVANT
TCGA-05-4244	7/22/10	Lung Adenocarcinoma	NO	YES	MALE	Lung	[Not Available]	[Not Available]	[Not Available]	No	R-Lower	Peripheral Lung	2009	[Not Available]	[Not Available]	RX	6th	T2	N2	M1	Stage IV	[Not Applicable]	[Not Applicable]	[Not Applicable]	[Not Applicable]	[Not Available]	[Not Available]	[Not Available]	[Not Available]	[Not Available]	[Not Available]	[Not Available]	[Not Available]	[Not Available]	[Not Available]	[Not Available]	[Not Available]	[Not Available]	4	No	[Not Available]	[Not Available]	38	[Not Available]	Alive	[Not Available]	[Not Available]	[Not Available]	[Not Available]
TCGA-05-4245	7/22/10	Lung Adenocarcinoma	NO	YES	Male	Lung	[Not Available]	[Not Available]	[Not Available]	Yes	L-Upper	[Not Available]	2009	[Not Available]	[Not Available]	R2	6th	T2	N2	M0	Stage IIIA	[Not Applicable]	[Not Applicable]	[Not Applicable]	[Not Applicable]	[Not Available]	[Not Available]	[Not Available]	[Not Available]	[Not Available]	[Not Available]	[Not Available]	[Not Available]	[Not Available]	[Not Available]	[Not Available]	[Not Available]	[Not Available]	4	No	[Not Available]	[Not Available]	32	[Not Available]	Alive	[Not Available]	[Not Available]	[Not Available]	[Not Available]
TCGA-05-4249	7/22/10	Lung Adenocarcinoma	NO	YES	Male	Lung	[Not Available]	[Not Available]	[Not Available]	No	R-Lower	Peripheral Lung	2007	[Not Available]	[Not Available]	R0	6th	T2	N0	M0	Stage IB	[Not Applicable]	[Not Applicable]	[Not Applicable]	[Not Applicable]	[Not Available]	[Not Available]	[Not Available]	[Not Available]	[Not Available]	[Not Available]	[Not Available]	[Not Available]	[Not Available]	[Not Available]	[Not Available]	[Not Available]	[Not Available]	3	No	[Not Available]	[Not Available]	52	[Not Available]	Alive	[Not Available]	[Not Available]	[Not Available]	[Not Available]
TCGA-05-4250	7/22/10	Lung Adenocarcinoma	NO	YES	Female	Lung	[Not Available]	[Not Available]	[Not Available]	No	R-Lower	[Not Available]	2007	[Not Available]	[Not Available]	R2	6th	T3	N1	M0	Stage IIIA	[Not Applicable]	[Not Applicable]	[Not Applicable]	[Not Applicable]	[Not Available]	[Not Available]	[Not Available]	[Not Available]	[Not Available]	[Not Available]	[Not Available]	[Not Available]	[Not Available]	[Not Available]	[Not Available]	[Not Available]	[Not Available]	4	No	[Not Available]	[Not Available]	47	[Not Available]	Dead	[Not Available]	[Not Available]	[Not Available]	[Not Available]
TCGA-05-4382	7/22/10	Lung Adenocarcinoma	NO	YES	Male	Lung	[Not Available]	[Not Available]	[Not Available]	Yes	L-Upper	[Not Available]	2009	[Not Available]	[Not Available]	R0	6th	T2	N0	M0	Stage IB	[Not Applicable]	[Not Applicable]	[Not Applicable]	[Not Applicable]	[Not Available]	[Not Available]	[Not Available]	[Not Available]	[Not Available]	[Not Available]	[Not Available]	[Not Available]	[Not Available]	[Not Available]	[Not Available]	[Not Available]	[Not Available]	4	No	[Not Available]	[Not Available]	62	[Not Available]	Alive	[Not Available]	[Not Available]	[Not Available]	[Not Available]
TCGA-05-4384	7/22/10	Lung Adenocarcinoma	NO	YES	Male	Lung	[Not Available]	[Not Available]	[Not Available]	Yes	R-Lower	[Not Available]	2009	[Not Available]	[Not Available]	RX	6th	T2	N2	M0	Stage IIIA	[Not Applicable]	[Not Applicable]	[Not Applicable]	[Not Applicable]	[Not Available]	[Not Available]	[Not Available]	[Not Available]	[Not Available]	[Not Available]	[Not Available]	[Not Available]	[Not Available]	[Not Available]	[Not Available]	[Not Available]	[Not Available]	3	No	1963	1987	20	[Not Available]	Alive	[Not Available]	[Not Available]	[Not Available]	[Not Available]
TCGA-05-4389	7/22/10	Lung Adenocarcinoma	NO	YES	Male	Lung	[Not Available]	[Not Available]	[Not Available]	No	R-Upper	[Not Available]	2005	[Not Available]	[Not Available]	R0	5th	T1	N0	M0	Stage IA	[Not Applicable]	[Not Applicable]	[Not Applicable]	[Not Applicable]	[Not Available]	[Not Available]	[Not Available]	[Not Available]	[Not Available]	[Not Available]	[Not Available]	[Not Available]	[Not Available]	[Not Available]	[Not Available]	[Not Available]	[Not Available]	3	No	[Not Available]	[Not Available]	43	[Not Available]	Alive	[Not Available]	[Not Available]	[Not Available]	[Not Available]
TCGA-05-4390	7/22/10	Lung Adenocarcinoma	NO	YES	Female	Lung	[Not Available]	[Not Available]	[Not Available]	No	R-Upper	[Not Available]	2005	[Not Available]	[Not Available]	R0	5th	T2	N0	M0	Stage IB	[Not Applicable]	[Not Applicable]	[Not Applicable]	[Not Applicable]	[Not Available]	[Not Available]	[Not Available]	[Not Available]	[Not Available]	[Not Available]	[Not Available]	[Not Available]	[Not Available]	[Not Available]	[Not Available]	[Not Available]	[Not Available]	4	No	1966	1996	15	[Not Available]	Alive	[Not Available]	[Not Available]	[Not Available]	[Not Available]
TCGA-05-4395	7/22/10	Lung Adenocarcinoma	NO	YES	Male	Lung	[Not Available]	[Not Available]	[Not Available]	No	L-Upper	[Not Available]	2006	[Not Available]	[Not Available]	R0	5th	T4	N2	M0	Stage IIIB	[Not Applicable]	[Not Applicable]	[Not Applicable]	[Not Applicable]	[Not Available]	[Not Available]	[Not Available]	[Not Available]	[Not Available]	[Not Available]	[Not Available]	[Not Available]	[Not Available]	[Not Available]	[Not Available]	[Not Available]	[Not Available]	3	No	[Not Available]	1983	[Not Available]	[Not Available]	Dead	[Not Available]	[Not Available]	[Not Available]	[Not Available]
TCGA-05-4396	7/22/10	Lung Adenocarcinoma	NO	YES	Male	Lung	[Not Available]	[Not Available]	[Not Available]	Yes	R-Lower	[Not Available]	2006	[Not Available]	[Not Available]	R0	5th	T4	N1	M0	Stage IIIB	[Not Applicable]	[Not Applicable]	[Not Applicable]	[Not Applicable]	[Not Available]	[Not Available]	[Not Available]	[Not Available]	[Not Available]	[Not Available]	[Not Available]	[Not Available]	[Not Available]	[Not Available]	[Not Available]	[Not Available]	[Not Available]	3	No	1947	1984	19	[Not Available]	Dead	[Not Available]	[Not Available]	[Not Available]	[Not Available]
TCGA-05-4397	7/22/10	Lung Adenocarcinoma	NO	YES	Male	Lung	[Not Available]	[Not Available]	[Not Available]	No	R-Middle	[Not Available]	2006	[Not Available]	[Not Available]	R0	5th	T2	N1	M0	Stage IIB	[Not Applicable]	[Not Applicable]	[Not Applicable]	[Not Applicable]	[Not Available]	[Not Available]	[Not Available]	[Not Available]	[Not Available]	[Not Available]	[Not Available]	[Not Available]	[Not Available]	[Not Available]	[Not Available]	[Not Available]	[Not Available]	2	No	[Not Available]	[Not Available]	45	[Not Available]	Dead	[Not Available]	[Not Available]	[Not Available]	[Not Available]
TCGA-05-4398	7/22/10	Lung Adenocarcinoma	NO	YES	Female	Lung	[Not Available]	[Not Available]	[Not Available]	No	R-Upper	[Not Available]	2006	[Not Available]	[Not Available]	R0	5th	T4	N3	M0	Stage IIIB	[Not Applicable]	[Not Applicable]	[Not Applicable]	[Not Applicable]	[Not Available]	[Not Available]	[Not Available]	[Not Available]	[Not Available]	[Not Available]	[Not Available]	[Not Available]	[Not Available]	[Not Available]	[Not Available]	[Not Available]	[Not Available]	2	No	[Not Available]	[Not Available]	72	[Not Available]	Alive	[Not Available]	[Not Available]	[Not Available]	[Not Available]
TCGA-05-4402	7/22/10	Lung Adenocarcinoma	NO	YES	Female	Lung	[Not Available]	[Not Available]	[Not Available]	Yes	R-Lower	[Not Available]	2007	[Not Available]	[Not Available]	R2	6th	T2	NX	M1	Stage IV	[Not Applicable]	[Not Applicable]	[Not Applicable]	[Not Applicable]	[Not Available]	[Not Available]	[Not Available]	[Not Available]	[Not Available]	[Not Available]	[Not Available]	[Not Available]	[Not Available]	[Not Available]	[Not Available]	[Not Available]	[Not Available]	1	No	[Not Available]	[Not Available]	[Not Available]	[Not Available]	Dead	[Not Available]	[Not Available]	[Not Available]	[Not Available]
TCGA-05-4403	7/22/10	Lung Adenocarcinoma	NO	YES	Male	Lung	[Not Available]	[Not Available]	[Not Available]	No	R-Upper	[Not Available]	2006	[Not Available]	[Not Available]	R0	5th	T2	N0	M0	Stage IB	[Not Applicable]	[Not Applicable]	[Not Applicable]	[Not Applicable]	[Not Available]	[Not Available]	[Not Available]	[Not Available]	[Not Available]	[Not Available]	[Not Available]	[Not Available]	[Not Available]	[Not Available]	[Not Available]	[Not Available]	[Not Available]	3	No	[Not Available]	1975	[Not Available]	[Not Available]	Alive	[Not Available]	[Not Available]	[Not Available]	[Not Available]
TCGA-05-4405	7/22/10	Lung Adenocarcinoma	NO	YES	Female	Lung	[Not Available]	[Not Available]	[Not Available]	Yes	R-Lower	[Not Available]	2006	[Not Available]	[Not Available]	R0	5th	T2	N0	M0	Stage IB	[Not Applicable]	[Not Applicable]	[Not Applicable]	[Not Applicable]	[Not Available]	[Not Available]	[Not Available]	[Not Available]	[Not Available]	[Not Available]	[Not Available]	[Not Available]	[Not Available]	[Not Available]	[Not Available]	[Not Available]	[Not Available]	4	No	1951	1994	65	[Not Available]	Alive	[Not Available]	[Not Available]	[Not Available]	[Not Available]
TCGA-05-4410	7/22/10	Lung Adenocarcinoma	NO	YES	Male	Lung	[Not Available]	[Not Available]	[Not Available]	Yes	L-Upper	[Not Available]	2007	[Not Available]	[Not Available]	RX	6th	T2	N0	M0	Stage IB	[Not Applicable]	[Not Applicable]	[Not Applicable]	[Not Applicable]	[Not Available]	[Not Available]	[Not Available]	[Not Available]	[Not Available]	[Not Available]	[Not Available]	[Not Available]	[Not Available]	[Not Available]	[Not Available]	[Not Available]	[Not Available]	4	No	1958	2007	98	[Not Available]	Alive	[Not Available]	[Not Available]	[Not Available]	[Not Available]
TCGA-05-4415	7/22/10	Lung Adenocarcinoma	NO	YES	Male	Lung	[Not Available]	[Not Available]	[Not Available]	No	L-Lower	[Not Available]	2008	[Not Available]	[Not Available]	R0	6th	T4	N2	M0	Stage IIIB	[Not Applicable]	[Not Applicable]	[Not Applicable]	[Not Applicable]	[Not Available]	[Not Available]	[Not Available]	[Not Available]	[Not Available]	[Not Available]	[Not Available]	[Not Available]	[Not Available]	[Not Available]	[Not Available]	[Not Available]	[Not Available]	4	No	1997	2007	29	[Not Available]	Dead	[Not Available]	[Not Available]	[Not Available]	[Not Available]
TCGA-05-4417	7/22/10	Lung Adenocarcinoma	NO	YES	Female	Lung	[Not Available]	[Not Available]	[Not Available]	No	R-Upper	[Not Available]	2008	[Not Available]	[Not Available]	R0	6th	T2	N0	M0	Stage IB	[Not Applicable]	[Not Applicable]	[Not Applicable]	[Not Applicable]	[Not Available]	[Not Available]	[Not Available]	[Not Available]	[Not Available]	[Not Available]	[Not Available]	[Not Available]	[Not Available]	[Not Available]	[Not Available]	[Not Available]	[Not Available]	4	No	1971	2008	56	[Not Available]	Alive	[Not Available]	[Not Available]	[Not Available]	[Not Available]
TCGA-05-4418	7/22/10	Lung Adenocarcinoma	NO	YES	Male	Lung	[Not Available]	[Not Available]	[Not Available]	Yes	L-Lower	[Not Available]	2008	[Not Available]	[Not Available]	R0	6th	T3	N2	M0	Stage IIIA	[Not Applicable]	[Not Applicable]	[Not Applicable]	[Not Applicable]	[Not Available]	[Not Available]	[Not Available]	[Not Available]	[Not Available]	[Not Available]	[Not Available]	[Not Available]	[Not Available]	[Not Available]	[Not Available]	[Not Available]	[Not Available]	2	No	[Not Available]	[Not Available]	25	[Not Available]	Dead	[Not Available]	[Not Available]	[Not Available]	[Not Available]
TCGA-05-4420	7/22/10	Lung Adenocarcinoma	NO	YES	Male	Lung	[Not Available]	[Not Available]	[Not Available]	No	R-Lower	[Not Available]	2008	[Not Available]	[Not Available]	R0	6th	T2	N0	M0	Stage IB	[Not Applicable]	[Not Applicable]	[Not Applicable]	[Not Applicable]	[Not Available]	[Not Available]	[Not Available]	[Not Available]	[Not Available]	[Not Available]	[Not Available]	[Not Available]	[Not Available]	[Not Available]	[Not Available]	[Not Available]	[Not Available]	2	No	[Not Available]	[Not Available]	38	[Not Available]	Alive	[Not Available]	[Not Available]	[Not Available]	[Not Available]
TCGA-05-4422	7/22/10	Lung Adenocarcinoma	NO	YES	Male	Lung	[Not Available]	[Not Available]	[Not Available]	No	L-Lower	[Not Available]	2008	[Not Available]	[Not Available]	R0	6th	T2	N0	M0	Stage IB	[Not Applicable]	[Not Applicable]	[Not Applicable]	[Not Applicable]	[Not Available]	[Not Available]	[Not Available]	[Not Available]	[Not Available]	[Not Available]	[Not Available]	[Not Available]	[Not Available]	[Not Available]	[Not Available]	[Not Available]	[Not Available]	4	No	[Not Available]	[Not Available]	147	[Not Available]	Alive	[Not Available]	[Not Available]	[Not Available]	[Not Available]
TCGA-05-4424	7/22/10	Lung Adenocarcinoma	NO	YES	Male	Lung	[Not Available]	[Not Available]	[Not Available]	No	R-Upper	[Not Available]	2008	[Not Available]	[Not Available]	R1	6th	T3	N0	M0	Stage IIB	[Not Applicable]	[Not Applicable]	[Not Applicable]	[Not Applicable]	[Not Available]	[Not Available]	[Not Available]	[Not Available]	[Not Available]	[Not Available]	[Not Available]	[Not Available]	[Not Available]	[Not Available]	[Not Available]	[Not Available]	[Not Available]	4	No	1957	2007	50	[Not Available]	Alive	[Not Available]	[Not Available]	[Not Available]	[Not Available]
TCGA-05-4425	7/22/10	Lung Adenocarcinoma	NO	YES	Female	Lung	[Not Available]	[Not Available]	[Not Available]	No	R-Middle	[Not Available]	2008	[Not Available]	[Not Available]	R1	6th	T2	N0	M1	Stage IV	[Not Applicable]	[Not Applicable]	[Not Applicable]	[Not Applicable]	[Not Available]	[Not Available]	[Not Available]	[Not Available]	[Not Available]	[Not Available]	[Not Available]	[Not Available]	[Not Available]	[Not Available]	[Not Available]	[Not Available]	[Not Available]	3	No	[Not Available]	[Not Available]	28	[Not Available]	Alive	[Not Available]	[Not Available]	[Not Available]	[Not Available]
TCGA-05-4426	7/22/10	Lung Adenocarcinoma	NO	YES	Male	Lung	[Not Available]	[Not Available]	[Not Available]	No	L-Lower	[Not Available]	2008	[Not Available]	[Not Available]	R0	6th	T2	N0	M0	Stage IB	[Not Applicable]	[Not Applicable]	[Not Applicable]	[Not Applicable]	[Not Available]	[Not Available]	[Not Available]	[Not Available]	[Not Available]	[Not Available]	[Not Available]	[Not Available]	[Not Available]	[Not Available]	[Not Available]	[Not Available]	[Not Available]	3	No	[Not Available]	[Not Available]	20	[Not Available]	Alive	[Not Available]	[Not Available]	[Not Available]	[Not Available]
TCGA-05-4427	7/22/10	Lung Adenocarcinoma	NO	YES	Female	Lung	[Not Available]	[Not Available]	[Not Available]	Yes	L-Upper	[Not Available]	2008	[Not Available]	[Not Available]	R0	6th	T2	N1	M0	Stage IIB	[Not Applicable]	[Not Applicable]	[Not Applicable]	[Not Applicable]	[Not Available]	[Not Available]	[Not Available]	[Not Available]	[Not Available]	[Not Available]	[Not Available]	[Not Available]	[Not Available]	[Not Available]	[Not Available]	[Not Available]	[Not Available]	4	No	1993	2008	8	[Not Available]	Alive	[Not Available]	[Not Available]	[Not Available]	[Not Available]
TCGA-05-4430	7/22/10	Lung Adenocarcinoma	NO	YES	Female	Lung	[Not Available]	[Not Available]	[Not Available]	No	L-Lower	[Not Available]	2008	[Not Available]	[Not Available]	R0	6th	T2	N0	M0	Stage IB	[Not Applicable]	[Not Applicable]	[Not Applicable]	[Not Applicable]	[Not Available]	[Not Available]	[Not Available]	[Not Available]	[Not Available]	[Not Available]	[Not Available]	[Not Available]	[Not Available]	[Not Available]	[Not Available]	[Not Available]	[Not Available]	4	No	[Not Available]	[Not Available]	80	[Not Available]	Alive	[Not Available]	[Not Available]	[Not Available]	[Not Available]
TCGA-05-4432	7/22/10	Lung Adenocarcinoma	NO	YES	Male	Lung	[Not Available]	[Not Available]	[Not Available]	No	R-Upper	[Not Available]	2008	[Not Available]	[Not Available]	R0	6th	T2	N1	M0	Stage IIB	[Not Applicable]	[Not Applicable]	[Not Applicable]	[Not Applicable]	[Not Available]	[Not Available]	[Not Available]	[Not Available]	[Not Available]	[Not Available]	[Not Available]	[Not Available]	[Not Available]	[Not Available]	[Not Available]	[Not Available]	[Not Available]	2	No	[Not Available]	[Not Available]	58	[Not Available]	Alive	[Not Available]	[Not Available]	[Not Available]	[Not Available]
TCGA-05-4433	7/22/10	Lung Adenocarcinoma	NO	YES	Male	Lung	[Not Available]	[Not Available]	[Not Available]	No	L-Lower	[Not Available]	2008	[Not Available]	[Not Available]	R0	6th	T2	N0	M0	Stage IB	[Not Applicable]	[Not Applicable]	[Not Applicable]	[Not Applicable]	[Not Available]	[Not Available]	[Not Available]	[Not Available]	[Not Available]	[Not Available]	[Not Available]	[Not Available]	[Not Available]	[Not Available]	[Not Available]	[Not Available]	[Not Available]	3	No	1946	1948	1	[Not Available]	Alive	[Not Available]	[Not Available]	[Not Available]	[Not Available]
TCGA-05-4434	7/22/10	Lung Adenocarcinoma	NO	YES	Female	Lung	[Not Available]	[Not Available]	[Not Available]	Yes	R-Lower	[Not Available]	2008	[Not Available]	[Not Available]	R2	6th	T4	N1	M1	Stage IV	[Not Applicable]	[Not Applicable]	[Not Applicable]	[Not Applicable]	[Not Available]	[Not Available]	[Not Available]	[Not Available]	[Not Available]	[Not Available]	[Not Available]	[Not Available]	[Not Available]	[Not Available]	[Not Available]	[Not Available]	[Not Available]	2	No	[Not Available]	[Not Available]	15	[Not Available]	Dead	[Not Available]	[Not Available]	[Not Available]	[Not Available]
TCGA-05-5420	3/22/11	Lung Adenocarcinoma	NO	YES	Male	Lung	[Not Available]	[Not Available]	[Not Available]	Yes	L-Upper	[Not Available]	2008	[Not Available]	[Not Available]	R0	6th	T2	N2	M0	Stage IIIA	[Not Applicable]	[Not Applicable]	[Not Applicable]	[Not Applicable]	[Not Available]	[Not Available]	[Not Available]	[Not Available]	[Not Available]	[Not Available]	[Not Available]	[Not Available]	[Not Available]	[Not Available]	[Not Available]	[Not Available]	[Not Available]	4	No	1961	2001	40	[Not Available]	Alive	[Not Available]	[Not Available]	[Not Available]	[Not Available]
TCGA-05-5423	3/22/11	Lung Adenocarcinoma	NO	YES	Male	Lung	[Not Available]	[Not Available]	[Not Available]	No	L-Upper	[Not Available]	2006	[Not Available]	[Not Available]	R0	6th	T2	N1	M0	Stage IIB	[Not Applicable]	[Not Applicable]	[Not Applicable]	[Not Applicable]	[Not Available]	[Not Available]	[Not Available]	[Not Available]	[Not Available]	[Not Available]	[Not Available]	[Not Available]	[Not Available]	[Not Available]	[Not Available]	[Not Available]	[Not Available]	3	No	1956	1980	72	[Not Available]	Alive	[Not Available]	[Not Available]	[Not Available]	[Not Available]
TCGA-05-5425	3/22/11	Lung Adenocarcinoma	NO	YES	Male	Lung	[Not Available]	[Not Available]	[Not Available]	No	R-Upper	[Not Available]	2009	[Not Available]	[Not Available]	R0	7th	T2b	N1	M0	Stage IIB	[Not Applicable]	[Not Applicable]	[Not Applicable]	[Not Applicable]	[Not Available]	[Not Available]	[Not Available]	[Not Available]	[Not Available]	[Not Available]	[Not Available]	[Not Available]	[Not Available]	[Not Available]	[Not Available]	[Not Available]	[Not Available]	3	No	1965	1985	40	[Not Available]	Alive	[Not Available]	[Not Available]	[Not Available]	[Not Available]
TCGA-05-5428	3/22/11	Lung Adenocarcinoma	NO	YES	Male	Lung	[Not Available]	[Not Available]	[Not Available]	No	R-Upper	[Not Available]	2010	[Not Available]	[Not Available]	R0	7th	T1b	N1	M0	Stage IIA	[Not Applicable]	[Not Applicable]	[Not Applicable]	[Not Applicable]	[Not Available]	[Not Available]	[Not Available]	[Not Available]	[Not Available]	[Not Available]	[Not Available]	[Not Available]	[Not Available]	[Not Available]	[Not Available]	[Not Available]	[Not Available]	3	No	1969	1993	30	[Not Available]	Alive	[Not Available]	[Not Available]	[Not Available]	[Not Available]
TCGA-05-5429	3/22/11	Lung Adenocarcinoma	NO	YES	Male	Lung	[Not Available]	[Not Available]	[Not Available]	No	L-Upper	[Not Available]	2010	[Not Available]	[Not Available]	R0	7th	T3	N2	M0	Stage IIIA	[Not Applicable]	[Not Applicable]	[Not Applicable]	[Not Applicable]	[Not Available]	[Not Available]	[Not Available]	[Not Available]	[Not Available]	[Not Available]	[Not Available]	[Not Available]	[Not Available]	[Not Available]	[Not Available]	[Not Available]	[Not Available]	1	No	[Not Available]	[Not Available]	[Not Available]	[Not Available]	Dead	[Not Available]	[Not Available]	[Not Available]	[Not Available]
TCGA-05-5715	3/22/11	Lung Adenocarcinoma	NO	YES	Female	Lung	[Not Available]	[Not Available]	[Not Available]	No	L-Upper	[Not Available]	2010	[Not Available]	[Not Available]	R0	7th	T2a	N0	M0	Stage IB	[Not Applicable]	[Not Applicable]	[Not Applicable]	[Not Applicable]	[Not Available]	[Not Available]	[Not Available]	[Not Available]	[Not Available]	[Not Available]	[Not Available]	[Not Available]	[Not Available]	[Not Available]	[Not Available]	[Not Available]	[Not Available]	1	No	[Not Available]	[Not Available]	[Not Available]	[Not Available]	Alive	[Not Available]	[Not Available]	[Not Available]	[Not Available]
TCGA-35-3615	12/20/10	Lung Adenocarcinoma	NO	YES	Male	Lung	WHITE	NOT HISPANIC OR LATINO	[Not Available]	No	R-Upper	Peripheral Lung	2007	[Not Available]	[Not Available]	R0	[Not Available]	T2	N0	M0	Stage IB	[Not Applicable]	[Not Applicable]	[Not Applicable]	[Not Applicable]	[Not Available]	[Not Available]	[Not Available]	[Not Available]	[Not Available]	[Not Available]	NO	[Not Available]	[Not Available]	NO	[Not Available]	NO	[Not Available]	1	No	[Not Available]	[Not Available]	[Not Available]	[Not Available]	Alive	[Not Available]	[Not Available]	[Not Available]	[Not Available]
TCGA-35-4122	12/20/10	Lung Adenocarcinoma	NO	YES	Male	Lung	WHITE	NOT HISPANIC OR LATINO	[Not Available]	No	L-Upper	Peripheral Lung	2010	[Not Available]	[Not Available]	R0	7th	T1	N0	M0	Stage IA	[Not Applicable]	[Not Applicable]	[Not Applicable]	[Not Applicable]	YES	[Not Available]	[Not Available]	[Not Available]	[Not Available]	[Not Available]	NO	[Not Available]	[Not Available]	NO	[Not Available]	NO	[Not Available]	4	No	1965	2010	45	80	Alive	1	Preoperative	[Not Available]	[Not Available]
TCGA-35-4123	12/20/10	Lung Adenocarcinoma	NO	YES	Male	Lung	WHITE	NOT HISPANIC OR LATINO	[Not Available]	No	R-Upper	Peripheral Lung	2010	[Not Available]	[Not Available]	R0	7th	T1	N0	M0	Stage IA	[Not Applicable]	[Not Applicable]	[Not Applicable]	[Not Applicable]	YES	[Not Available]	[Not Available]	[Not Available]	[Not Available]	[Not Available]	NO	[Not Available]	[Not Available]	NO	[Not Available]	NO	[Not Available]	4	No	1990	2010	20	90	Alive	1	Preoperative	[Not Available]	[Not Available]
TCGA-35-5375	5/20/11	Lung Adenocarcinoma	NO	YES	Male	Lung	WHITE	NOT HISPANIC OR LATINO	[Not Available]	No	L-Upper	Peripheral Lung	2010	[Not Available]	[Not Available]	R0	[Not Available]	T2	N2	M0	Stage IIIA	[Not Applicable]	[Not Applicable]	[Not Applicable]	[Not Applicable]	[Not Available]	[Not Available]	[Not Available]	[Not Available]	[Not Available]	[Not Available]	[Not Available]	[Not Available]	[Not Available]	[Not Available]	[Not Available]	[Not Available]	[Not Available]	4	No	1971	2006	35	90	Alive	1	Post-Adjuvant Therapy	[Not Available]	[Not Available]
TCGA-38-4625	2012-07-10	Lung Adenocarcinoma	NO	YES	Female	Lung	WHITE	NOT HISPANIC OR LATINO	[Not Available]	No	R-Upper	Peripheral Lung	2002	[Not Available]	[Not Available]	R0	5th	T2a	N0	M0	Stage IB	[Not Applicable]	[Not Applicable]	[Not Applicable]	[Not Applicable]	YES	64	66	68	66	68	NO	[Not Available]	[Not Available]	NO	[Not Available]	NO	[Not Available]	2	No	1952	[Not Available]	50	[Not Available]	Alive	[Not Available]	[Not Available]	[Not Available]	[Not Available]
TCGA-38-4626	2012-07-10	Lung Adenocarcinoma	NO	YES	Female	Lung	WHITE	NOT HISPANIC OR LATINO	[Not Available]	No	L-Upper	Central Lung	2003	[Not Available]	[Not Available]	R0	6th	T2b	N0	M0	[Discrepancy]	[Not Applicable]	[Not Applicable]	[Not Applicable]	[Not Applicable]	YES	85	85	71	68	57	[Not Available]	[Not Available]	[Not Available]	[Not Available]	[Not Available]	[Not Available]	[Not Available]	2	No	1962	[Not Available]	40	[Not Available]	Alive	[Not Available]	[Not Available]	[Not Available]	[Not Available]
TCGA-38-4627	2012-07-10	Lung Adenocarcinoma	NO	YES	Female	Lung	WHITE	NOT HISPANIC OR LATINO	[Not Available]	No	R-Upper	Central Lung	2003	[Not Available]	[Not Available]	R0	[Not Available]	T1b	N1	M0	Stage IIA	[Not Applicable]	[Not Applicable]	[Not Applicable]	[Not Applicable]	[Not Available]	[Not Available]	[Not Available]	[Not Available]	[Not Available]	[Not Available]	[Not Available]	[Not Available]	[Not Available]	[Not Available]	[Not Available]	[Not Available]	[Not Available]	4	No	[Not Available]	[Not Available]	[Not Available]	[Not Available]	Dead	[Not Available]	[Not Available]	[Not Available]	[Not Available]
TCGA-38-4628	2012-09-10	Lung Adenocarcinoma	NO	YES	Female	Lung	WHITE	NOT HISPANIC OR LATINO	[Not Available]	No	R-Upper	Central Lung	2002	[Not Available]	[Not Available]	R0	5th	T2	N1	M0	Stage IIB	[Not Applicable]	[Not Applicable]	[Not Applicable]	[Not Applicable]	YES	86	85	74	78	72	NO	[Not Available]	[Not Available]	NO	[Not Available]	NO	[Not Available]	1	No	[Not Available]	[Not Available]	[Not Available]	[Not Available]	Dead	[Not Available]	[Not Available]	[Not Available]	[Not Available]
TCGA-38-4629	12/13/10	Lung Adenocarcinoma	NO	YES	Male	Lung	WHITE	NOT HISPANIC OR LATINO	[Not Available]	Yes	R-Upper	Peripheral Lung	2003	[Not Available]	[Not Available]	R0	[Not Available]	T3	N0	M0	Stage IIB	[Not Applicable]	[Not Applicable]	[Not Applicable]	[Not Applicable]	[Not Available]	[Not Available]	[Not Available]	[Not Available]	[Not Available]	[Not Available]	NO	[Not Available]	[Not Available]	NO	[Not Available]	NO	[Not Available]	4	No	[Not Available]	2003	100	[Not Available]	Dead	[Not Available]	[Not Available]	[Not Available]	[Not Available]
TCGA-38-4630	12/14/10	Lung Adenocarcinoma	NO	YES	Female	Lung	WHITE	NOT HISPANIC OR LATINO	[Not Available]	Yes	R-Upper	Peripheral Lung	2000	[Not Available]	[Not Available]	R1	6th	T2	N0	M0	Stage IB	[Not Applicable]	[Not Applicable]	[Not Applicable]	[Not Applicable]	NO	[Not Available]	[Not Available]	[Not Available]	[Not Available]	[Not Available]	NO	[Not Available]	[Not Available]	NO	[Not Available]	NO	[Not Available]	1	No	[Not Available]	[Not Available]	[Not Available]	[Not Available]	Dead	[Not Available]	[Not Available]	[Not Available]	[Not Available]
TCGA-38-4631	12/14/10	Lung Adenocarcinoma	NO	YES	Female	Lung	WHITE	NOT HISPANIC OR LATINO	[Not Available]	Yes	L-Upper	Peripheral Lung	1997	[Not Available]	[Not Available]	R0	[Not Available]	T2	N0	M0	Stage IB	[Not Applicable]	[Not Applicable]	[Not Applicable]	[Not Applicable]	[Not Available]	[Not Available]	[Not Available]	[Not Available]	[Not Available]	[Not Available]	NO	[Not Available]	[Not Available]	NO	[Not Available]	NO	[Not Available]	4	No	[Not Available]	[Not Available]	40	[Not Available]	Dead	[Not Available]	[Not Available]	[Not Available]	[Not Available]
TCGA-38-4632	12/13/10	Lung Adenocarcinoma	NO	YES	Male	Lung	BLACK OR AFRICAN AMERICAN	NOT HISPANIC OR LATINO	[Not Available]	No	L-Upper	Peripheral Lung	1998	[Not Available]	[Not Available]	R0	5th	T2	N1	M1	Stage IV	[Not Applicable]	[Not Applicable]	[Not Applicable]	[Not Applicable]	NO	[Not Available]	[Not Available]	[Not Available]	[Not Available]	[Not Available]	NO	[Not Available]	[Not Available]	NO	[Not Available]	NO	[Not Available]	4	No	[Not Available]	1991	10	[Not Available]	Dead	[Not Available]	[Not Available]	[Not Available]	[Not Available]
TCGA-38-6178	4/14/11	Lung Adenocarcinoma	YES	NO	Female	Lung	WHITE	NOT HISPANIC OR LATINO	[Not Available]	Yes	L-Upper	Central Lung	2010	[Not Available]	[Not Available]	R1	[Not Available]	T2b	N2	[Not Available]	Stage IIIA	[Not Applicable]	[Not Applicable]	[Not Applicable]	[Not Applicable]	[Not Available]	[Not Available]	[Not Available]	[Not Available]	[Not Available]	[Not Available]	YES	NO	[Not Available]	YES	Exon 19 Deletion	NO	[Not Available]	1	No	[Not Available]	[Not Available]	[Not Available]	[Not Available]	Alive	[Not Available]	[Not Available]	[Not Available]	[Not Available]
TCGA-38-7271	2011-10-11	Lung Adenocarcinoma	NO	YES	Female	Lung	WHITE	NOT HISPANIC OR LATINO	[Not Available]	Yes	R-Upper	[Not Available]	2006	[Not Available]	[Not Available]	R0	6th	T1	N0	M0	Stage IA	[Not Applicable]	[Not Applicable]	[Not Applicable]	[Not Applicable]	YES	40	45	43	46	76	NO	[Not Available]	[Not Available]	NO	[Not Available]	NO	[Not Available]	4	No	1971	1999	25	[Not Available]	Dead	[Not Available]	[Not Available]	[Not Available]	[Not Available]
TCGA-38-A44F	10/31/12	Lung Adenocarcinoma	YES	NO	Male	Lung	WHITE	NOT HISPANIC OR LATINO	[Not Available]	No	R-Upper	Peripheral Lung	2012	[Not Available]	[Not Available]	R0	7th	T2a	N0	M0	Stage IB	[Not Applicable]	[Not Applicable]	[Not Applicable]	[Not Applicable]	YES	52	[Not Available]	72	71	35	NO	[Not Available]	[Not Available]	NO	[Not Available]	YES	FISH	3	No	1965	1977	12	[Not Available]	Alive	[Not Available]	[Not Available]	NO	[Not Available]
TCGA-44-2655	2010-09-10	Lung Adenocarcinoma	YES	NO	Female	Lung	WHITE	NOT HISPANIC OR LATINO	[Not Available]	Yes	R-Upper	[Not Available]	2009	[Not Available]	[Not Available]	R0	6th	T1	N0	M0	Stage IA	[Not Applicable]	[Not Applicable]	[Not Applicable]	[Not Applicable]	YES	91	[Not Available]	100	[Not Available]	73	NO	[Not Available]	[Not Available]	[Not Available]	[Not Available]	[Not Available]	[Not Available]	3	No	1958	1988	30	[Not Available]	Alive	0	Pre-Adjuvant Therapy	[Not Available]	[Not Available]
TCGA-44-2656	2010-08-10	Lung Adenocarcinoma	YES	NO	Male	Lung	WHITE	NOT HISPANIC OR LATINO	[Not Available]	No	R-Upper	[Not Available]	2009	[Not Available]	[Not Available]	[Not Available]	6th	T2	N0	M0	Stage IB	[Not Applicable]	[Not Applicable]	[Not Applicable]	[Not Applicable]	YES	79	84	86	86	72	NO	[Not Available]	[Not Available]	[Not Available]	[Not Available]	[Not Available]	[Not Available]	4	No	1994	2009	23	[Not Available]	Alive	0	Pre-Adjuvant Therapy	[Not Available]	[Not Available]
TCGA-44-2657	2010-08-10	Lung Adenocarcinoma	YES	NO	Female	Lung	WHITE	NOT HISPANIC OR LATINO	[Not Available]	No	L-Upper	[Not Available]	2009	[Not Available]	[Not Available]	R0	6th	T2	NX	M0	Stage IB	[Not Applicable]	[Not Applicable]	[Not Applicable]	[Not Applicable]	YES	120	147	78	87	96	NO	[Not Available]	[Not Available]	[Not Available]	[Not Available]	[Not Available]	[Not Available]	4	No	1959	2006	25	[Not Available]	Alive	0	Pre-Adjuvant Therapy	[Not Available]	[Not Available]
TCGA-44-2659	2010-11-10	Lung Adenocarcinoma	YES	NO	Female	Lung	WHITE	NOT HISPANIC OR LATINO	[Not Available]	No	[Discrepancy]	[Not Available]	2009	[Not Available]	[Not Available]	R0	6th	T1	N1	M0	Stage IIB	[Not Applicable]	[Not Applicable]	[Not Applicable]	[Not Applicable]	YES	64	73	77	87	67	NO	[Not Available]	[Not Available]	[Not Available]	[Not Available]	[Not Available]	[Not Available]	4	No	1965	2003	57	[Not Available]	Alive	1	Other	[Not Available]	[Not Available]
TCGA-44-2661	2010-08-10	Lung Adenocarcinoma	YES	NO	Female	Lung	WHITE	NOT HISPANIC OR LATINO	[Not Available]	Yes	L-Upper	[Not Available]	2009	[Not Available]	[Not Available]	R0	6th	T1	N0	M0	Stage IA	[Not Applicable]	[Not Applicable]	[Not Applicable]	[Not Applicable]	YES	[Not Available]	[Not Available]	[Not Available]	[Not Available]	[Not Available]	NO	[Not Available]	[Not Available]	[Not Available]	[Not Available]	[Not Available]	[Not Available]	1	No	[Not Available]	[Not Available]	[Not Available]	[Not Available]	Alive	1	Pre-Adjuvant Therapy	[Not Available]	[Not Available]
TCGA-44-2662	2010-12-10	Lung Adenocarcinoma	YES	NO	Male	Lung	WHITE	NOT HISPANIC OR LATINO	[Not Available]	Yes	R-Upper	[Not Available]	2009	[Not Available]	[Not Available]	R0	6th	T2	N0	M0	Stage IB	[Not Applicable]	[Not Applicable]	[Not Applicable]	[Not Applicable]	YES	67	73	88	94	78	NO	[Not Available]	[Not Available]	[Not Available]	[Not Available]	[Not Available]	[Not Available]	3	[Discrepancy]	1956	1984	56	[Not Available]	Alive	[Not Available]	[Not Available]	[Not Available]	[Not Available]
TCGA-44-2664	2010-11-10	Lung Adenocarcinoma	YES	NO	Female	Lung	BLACK OR AFRICAN AMERICAN	NOT HISPANIC OR LATINO	[Not Available]	No	R-Lower	[Not Available]	2009	[Not Available]	[Not Available]	R0	6th	T1	N0	M0	Stage IA	[Not Applicable]	[Not Applicable]	[Not Applicable]	[Not Applicable]	YES	113	[Not Available]	109	[Not Available]	74	NO	[Not Available]	[Not Available]	[Not Available]	[Not Available]	[Not Available]	[Not Available]	2	No	1964	[Not Available]	23	[Not Available]	Alive	[Not Available]	[Not Available]	[Not Available]	[Not Available]
TCGA-44-2665	10/13/10	Lung Adenocarcinoma	YES	NO	Female	Lung	WHITE	NOT HISPANIC OR LATINO	[Not Available]	No	R-Upper	[Not Available]	2009	[Not Available]	[Not Available]	R0	6th	T2	N1	M0	Stage IIB	[Not Applicable]	[Not Applicable]	[Not Applicable]	[Not Applicable]	YES	114	105	79	79	71	NO	[Not Available]	[Not Available]	[Not Available]	[Not Available]	[Not Available]	[Not Available]	1	No	[Not Available]	[Not Available]	[Not Available]	[Not Available]	Alive	1	Pre-Adjuvant Therapy	[Not Available]	[Not Available]
TCGA-44-2666	2010-08-10	Lung Adenocarcinoma	YES	NO	Male	Lung	WHITE	HISPANIC OR LATINO	[Not Available]	No	R-Upper	[Not Available]	2009	[Not Available]	[Not Available]	R0	6th	T2	N0	M0	Stage IB	[Not Applicable]	[Not Applicable]	[Not Applicable]	[Not Applicable]	YES	87	[Not Available]	86	[Not Available]	66	NO	[Not Available]	[Not Available]	[Not Available]	[Not Available]	[Not Available]	[Not Available]	2	No	1979	[Not Available]	30	[Not Available]	Dead	[Not Available]	[Not Available]	[Not Available]	[Not Available]
TCGA-44-2668	10/22/10	Lung Adenocarcinoma	YES	NO	Male	Lung	WHITE	NOT HISPANIC OR LATINO	[Not Available]	No	R-Upper	[Not Available]	2009	[Not Available]	[Not Available]	R0	6th	T2	N0	M0	Stage IB	[Not Applicable]	[Not Applicable]	[Not Applicable]	[Not Applicable]	YES	82	[Not Available]	104	[Not Available]	53	NO	[Not Available]	[Not Available]	[Not Available]	[Not Available]	[Not Available]	[Not Available]	4	No	1979	2009	60	[Not Available]	Dead	0	Other	[Not Available]	[Not Available]
TCGA-44-3396	10/18/10	Lung Adenocarcinoma	YES	NO	Female	Lung	WHITE	NOT HISPANIC OR LATINO	[Not Available]	No	[Discrepancy]	[Not Available]	2009	[Not Available]	[Not Available]	R0	7th	T2	N2	M0	Stage IIIA	[Not Applicable]	[Not Applicable]	[Not Applicable]	[Not Applicable]	YES	89	[Not Available]	98	[Not Available]	48	NO	[Not Available]	[Not Available]	[Not Available]	[Not Available]	[Not Available]	[Not Available]	2	No	1959	[Not Available]	50	[Not Available]	Alive	1	Other	[Not Available]	[Not Available]
TCGA-44-3398	2010-11-10	Lung Adenocarcinoma	YES	NO	Female	Lung	WHITE	NOT HISPANIC OR LATINO	[Not Available]	No	R-Lower	[Not Available]	2009	[Not Available]	[Not Available]	R0	6th	T1b	N0	M0	Stage IA	[Not Applicable]	[Not Applicable]	[Not Applicable]	[Not Applicable]	YES	87	96	84	89	60	NO	[Not Available]	[Not Available]	[Not Available]	[Not Available]	[Not Available]	[Not Available]	4	No	1959	2009	60	[Not Available]	Alive	[Not Available]	[Not Available]	[Not Available]	[Not Available]
TCGA-44-3917	2010-08-10	Lung Adenocarcinoma	YES	NO	Female	Lung	WHITE	NOT HISPANIC OR LATINO	[Not Available]	No	R-Upper	[Not Available]	2009	[Not Available]	[Not Available]	R0	6th	T2	N0	M0	Stage IB	[Not Applicable]	[Not Applicable]	[Not Applicable]	[Not Applicable]	YES	106	[Not Available]	87	[Not Available]	83	NO	[Not Available]	[Not Available]	[Not Available]	[Not Available]	[Not Available]	[Not Available]	2	No	1993	[Not Available]	16	[Not Available]	Alive	[Not Available]	[Not Available]	[Not Available]	[Not Available]
TCGA-44-3918	2010-07-10	Lung Adenocarcinoma	YES	NO	Female	Lung	WHITE	NOT HISPANIC OR LATINO	[Not Available]	No	L-Upper	[Not Available]	2010	[Not Available]	[Not Available]	R0	6th	T1	N0	M0	Stage IA	[Not Applicable]	[Not Applicable]	[Not Applicable]	[Not Applicable]	YES	104	[Not Available]	103	[Not Available]	76	NO	[Not Available]	[Not Available]	[Not Available]	[Not Available]	[Not Available]	[Not Available]	3	No	1974	1994	20	[Not Available]	Alive	[Not Available]	[Not Available]	[Not Available]	[Not Available]
TCGA-44-3919	2010-07-10	Lung Adenocarcinoma	YES	NO	Female	Lung	WHITE	NOT HISPANIC OR LATINO	[Not Available]	No	R-Upper	[Not Available]	2010	[Not Available]	[Not Available]	R0	7th	T1	N0	M0	Stage IA	[Not Applicable]	[Not Applicable]	[Not Applicable]	[Not Applicable]	YES	100	[Not Available]	99	[Not Available]	103	NO	[Not Available]	[Not Available]	[Not Available]	[Not Available]	[Not Available]	[Not Available]	1	No	[Not Available]	[Not Available]	[Not Available]	[Not Available]	Dead	[Not Available]	[Not Available]	[Not Available]	[Not Available]
TCGA-44-4112	2010-12-10	Lung Adenocarcinoma	YES	NO	Female	Lung	WHITE	NOT HISPANIC OR LATINO	[Not Available]	No	R-Upper	[Not Available]	2010	[Not Available]	[Not Available]	R0	6th	T2a	N0	M0	Stage IB	[Not Applicable]	[Not Applicable]	[Not Applicable]	[Not Applicable]	YES	[Not Available]	[Not Available]	[Not Available]	[Not Available]	[Not Available]	NO	[Not Available]	[Not Available]	[Not Available]	[Not Available]	[Not Available]	[Not Available]	3	No	1972	1992	30	[Not Available]	Dead	[Not Available]	[Not Available]	[Not Available]	[Not Available]
TCGA-44-5643	4/13/11	Lung Adenocarcinoma	YES	NO	Male	Lung	BLACK OR AFRICAN AMERICAN	NOT HISPANIC OR LATINO	[Not Available]	No	R-Lower	[Not Available]	2010	[Not Available]	[Not Available]	[Not Available]	7th	T2b	N2	M0	Stage IIIA	[Not Applicable]	[Not Applicable]	[Not Applicable]	[Not Applicable]	YES	66	[Not Available]	92	[Not Available]	75	[Not Available]	[Not Available]	[Not Available]	[Not Available]	[Not Available]	[Not Available]	[Not Available]	2	No	[Not Available]	[Not Available]	20	[Not Available]	Alive	[Not Available]	[Not Available]	[Not Available]	[Not Available]
TCGA-44-5644	2010-12-11	Lung Adenocarcinoma	YES	NO	Female	Lung	WHITE	NOT HISPANIC OR LATINO	[Not Available]	No	R-Lower	[Not Available]	2010	[Not Available]	[Not Available]	[Not Available]	7th	T2a	N0	[Not Available]	Stage IB	[Not Applicable]	[Not Applicable]	[Not Applicable]	[Not Applicable]	YES	59	[Not Available]	103	[Not Available]	61	[Not Available]	[Not Available]	[Not Available]	[Not Available]	[Not Available]	[Not Available]	[Not Available]	2	No	1975	[Not Available]	17.5	[Not Available]	Alive	[Not Available]	[Not Available]	[Not Available]	[Not Available]
TCGA-44-5645	4/13/11	Lung Adenocarcinoma	YES	NO	Female	Lung	BLACK OR AFRICAN AMERICAN	NOT HISPANIC OR LATINO	[Not Available]	No	L-Upper	[Not Available]	2010	[Not Available]	[Not Available]	[Not Available]	7th	T1	NX	[Not Available]	Stage IA	[Not Applicable]	[Not Applicable]	[Not Applicable]	[Not Applicable]	YES	100	[Not Available]	90	[Not Available]	82	[Not Available]	[Not Available]	[Not Available]	[Not Available]	[Not Available]	[Not Available]	[Not Available]	3	No	1963	1973	5	[Not Available]	Alive	[Not Available]	[Not Available]	[Not Available]	[Not Available]
TCGA-44-6144	2006-07-11	Lung Adenocarcinoma	YES	NO	Male	Lung	WHITE	NOT HISPANIC OR LATINO	[Not Available]	No	R-Upper	[Not Available]	2011	[Not Available]	[Not Available]	RX	7th	T1a	N0	M0	Stage IA	[Not Applicable]	[Not Applicable]	[Not Applicable]	[Not Applicable]	YES	63	77	87	97	82	[Not Available]	[Not Available]	[Not Available]	[Not Available]	[Not Available]	[Not Available]	[Not Available]	2	No	1968	[Not Available]	67.5	[Not Available]	Alive	0	Preoperative	[Not Available]	[Not Available]
TCGA-44-6145	5/31/11	Lung Adenocarcinoma	YES	NO	Female	Lung	WHITE	NOT HISPANIC OR LATINO	[Not Available]	No	R-Upper	[Not Available]	2011	[Not Available]	[Not Available]	[Not Available]	7th	T1	N0	M0	Stage IA	[Not Applicable]	[Not Applicable]	[Not Applicable]	[Not Applicable]	YES	71	90	77	91	73	NO	NO	[Not Available]	[Not Available]	[Not Available]	[Not Available]	[Not Available]	4	No	1963	1999	75	[Not Available]	Alive	0	Preoperative	[Not Available]	[Not Available]
TCGA-44-6146	2006-07-11	Lung Adenocarcinoma	YES	NO	Male	Lung	WHITE	NOT HISPANIC OR LATINO	[Not Available]	Yes	L-Lower	[Not Available]	2010	[Not Available]	[Not Available]	[Not Available]	7th	T3	N0	M0	Stage IIB	[Not Applicable]	[Not Applicable]	[Not Applicable]	[Not Applicable]	YES	87	94	88	95	76	[Not Available]	[Not Available]	[Not Available]	[Not Available]	[Not Available]	[Not Available]	[Not Available]	3	No	[Not Available]	1980	15	[Not Available]	Alive	1	Other	[Not Available]	[Not Available]
TCGA-44-6147	2007-05-11	Lung Adenocarcinoma	YES	NO	Female	Lung	WHITE	NOT HISPANIC OR LATINO	[Not Available]	Yes	R-Upper	[Not Available]	2010	[Not Available]	[Not Available]	[Not Available]	7th	T1b	NX	M0	Stage IA	[Not Applicable]	[Not Applicable]	[Not Applicable]	[Not Applicable]	YES	97	[Not Available]	105	[Not Available]	68	[Not Available]	[Not Available]	[Not Available]	[Not Available]	[Not Available]	[Not Available]	[Not Available]	3	No	1976	1980	[Not Available]	[Not Available]	Alive	[Not Available]	[Not Available]	[Not Available]	[Not Available]
TCGA-44-6148	5/31/11	Lung Adenocarcinoma	YES	NO	Male	Lung	WHITE	NOT HISPANIC OR LATINO	[Not Available]	No	L-Lower	[Not Available]	2011	[Not Available]	[Not Available]	RX	7th	T1b	N0	M0	Stage IA	[Not Applicable]	[Not Applicable]	[Not Applicable]	[Not Applicable]	YES	74	77	98	110	[Not Available]	NO	NO	[Not Available]	[Not Available]	[Not Available]	[Not Available]	[Not Available]	3	No	1963	1994	60	[Not Available]	Alive	1	Preoperative	[Not Available]	[Not Available]
TCGA-44-6774	8/24/11	Lung Adenocarcinoma	YES	NO	Female	Lung	WHITE	NOT HISPANIC OR LATINO	[Not Available]	No	L-Lower	[Not Available]	2011	[Not Available]	[Not Available]	[Not Available]	7th	T1	N2	M0	Stage IIIA	[Not Applicable]	[Not Applicable]	[Not Applicable]	[Not Applicable]	YES	96	[Not Available]	84	[Not Available]	101	[Not Available]	[Not Available]	[Not Available]	[Not Available]	[Not Available]	[Not Available]	[Not Available]	2	No	1971	[Not Available]	20	[Not Available]	Alive	1	Other	[Not Available]	[Not Available]
TCGA-44-6775	8/24/11	Lung Adenocarcinoma	YES	NO	Female	Lung	WHITE	HISPANIC OR LATINO	[Not Available]	No	R-Upper	[Not Available]	2011	[Not Available]	[Not Available]	RX	7th	T2a	N0	MX	Stage IB	[Not Applicable]	[Not Applicable]	[Not Applicable]	[Not Applicable]	YES	68	72	84	89	66	[Not Available]	[Not Available]	[Not Available]	[Not Available]	[Not Available]	[Not Available]	[Not Available]	4	No	1955	2005	25	[Not Available]	Alive	[Not Available]	[Not Available]	[Not Available]	[Not Available]
TCGA-44-6776	8/25/11	Lung Adenocarcinoma	NO	YES	Female	Lung	WHITE	[Not Available]	[Not Available]	Yes	R-Upper	[Not Available]	2005	[Not Available]	[Not Available]	[Not Available]	6th	T1	N0	MX	Stage IA	[Not Applicable]	[Not Applicable]	[Not Applicable]	[Not Applicable]	YES	74	82	95	85	80	[Not Available]	[Not Available]	[Not Available]	[Not Available]	[Not Available]	[Not Available]	[Not Available]	4	No	1960	2005	45	[Not Available]	Alive	[Not Available]	[Not Available]	[Not Available]	[Not Available]
TCGA-44-6777	8/30/11	Lung Adenocarcinoma	NO	YES	Female	Lung	WHITE	[Not Available]	[Not Available]	No	L-Upper	[Not Available]	2006	[Not Available]	[Not Available]	[Not Available]	6th	T2	NX	MX	Stage IB	[Not Applicable]	[Not Applicable]	[Not Applicable]	[Not Applicable]	YES	62	71	68	77	178	[Not Available]	[Not Available]	[Not Available]	[Not Available]	[Not Available]	[Not Available]	[Not Available]	4	No	1942	2006	64	[Not Available]	Dead	1	Preoperative	[Not Available]	[Not Available]
TCGA-44-6778	8/31/11	Lung Adenocarcinoma	NO	YES	Male	Lung	BLACK OR AFRICAN AMERICAN	[Not Available]	[Not Available]	No	[Discrepancy]	[Not Available]	2007	[Not Available]	[Not Available]	[Not Available]	6th	T1	N0	MX	Stage IA	[Not Applicable]	[Not Applicable]	[Not Applicable]	[Not Applicable]	YES	74	[Not Available]	90	[Not Available]	53	[Not Available]	[Not Available]	[Not Available]	[Not Available]	[Not Available]	[Not Available]	[Not Available]	4	No	1974	2004	15	[Not Available]	Alive	[Not Available]	[Not Available]	[Not Available]	[Not Available]
TCGA-44-6779	8/31/11	Lung Adenocarcinoma	NO	YES	Female	Lung	WHITE	[Not Available]	[Not Available]	No	[Discrepancy]	[Not Available]	2008	[Not Available]	[Not Available]	[Not Available]	6th	T2	N1	MX	Stage IIB	[Not Applicable]	[Not Applicable]	[Not Applicable]	[Not Applicable]	YES	49	48	83	83	44	[Not Available]	[Not Available]	[Not Available]	[Not Available]	[Not Available]	[Not Available]	[Not Available]	4	No	1978	2008	15	[Not Available]	Dead	[Not Available]	[Not Available]	[Not Available]	[Not Available]
TCGA-44-7659	12/30/11	Lung Adenocarcinoma	YES	NO	Male	Lung	WHITE	NOT HISPANIC OR LATINO	[Not Available]	No	L-Upper	[Not Available]	2010	[Not Available]	[Not Available]	[Not Available]	7th	T1b	N0	MX	Stage IA	[Not Applicable]	[Not Applicable]	[Not Applicable]	[Not Applicable]	YES	42	47	55	60	43	NO	[Not Available]	[Not Available]	[Not Available]	[Not Available]	[Not Available]	[Not Available]	2	No	1989	[Not Available]	40	[Not Available]	Alive	[Not Available]	[Not Available]	[Not Available]	[Not Available]
TCGA-44-7660	12/22/11	Lung Adenocarcinoma	YES	NO	Male	Lung	WHITE	NOT HISPANIC OR LATINO	[Not Available]	No	R-Upper	[Not Available]	2011	[Not Available]	[Not Available]	[Not Available]	7th	T2	N0	MX	Stage IB	[Not Applicable]	[Not Applicable]	[Not Applicable]	[Not Applicable]	YES	83	94	92	95	80	NO	[Not Available]	[Not Available]	[Not Available]	[Not Available]	[Not Available]	[Not Available]	2	No	1949	[Not Available]	124	[Not Available]	Alive	1	Pre-Adjuvant Therapy	[Not Available]	[Not Available]
TCGA-44-7661	1/17/12	Lung Adenocarcinoma	YES	NO	Female	Lung	WHITE	NOT HISPANIC OR LATINO	[Not Available]	Yes	R-Lower	Peripheral Lung	2011	[Not Available]	[Not Available]	[Not Available]	7th	T2a	N0	M0	Stage IB	[Not Applicable]	[Not Applicable]	[Not Applicable]	[Not Applicable]	YES	68	81	92	95	[Not Available]	[Not Available]	[Not Available]	[Not Available]	YES	[Not Available]	YES	[Not Available]	3	No	1961	1976	22	[Not Available]	Dead	0	Preoperative	[Not Available]	[Not Available]
TCGA-44-7662	12/21/11	Lung Adenocarcinoma	YES	NO	Male	Lung	WHITE	NOT HISPANIC OR LATINO	[Not Available]	No	L-Upper	[Not Available]	2011	[Not Available]	[Not Available]	[Not Available]	7th	T2a	N0	MX	Stage IB	[Not Applicable]	[Not Applicable]	[Not Applicable]	[Not Applicable]	YES	60	68	68	66	57	NO	[Not Available]	[Not Available]	[Not Available]	[Not Available]	[Not Available]	[Not Available]	2	No	1961	[Not Available]	50	[Not Available]	Alive	[Not Available]	[Not Available]	[Not Available]	[Not Available]
TCGA-44-7667	12/21/11	Lung Adenocarcinoma	YES	NO	Female	Lung	WHITE	NOT HISPANIC OR LATINO	[Not Available]	No	R-Lower	[Not Available]	2009	[Not Available]	[Not Available]	[Not Available]	6th	T3	N0	MX	Stage IIB	[Not Applicable]	[Not Applicable]	[Not Applicable]	[Not Applicable]	YES	74	[Not Available]	104	[Not Available]	50	NO	[Not Available]	[Not Available]	[Not Available]	[Not Available]	[Not Available]	[Not Available]	2	No	1974	[Not Available]	50	[Not Available]	Alive	[Not Available]	[Not Available]	[Not Available]	[Not Available]
TCGA-44-7669	12/21/11	Lung Adenocarcinoma	YES	NO	Male	Lung	BLACK OR AFRICAN AMERICAN	NOT HISPANIC OR LATINO	[Not Available]	No	R-Upper	[Not Available]	2010	[Not Available]	[Not Available]	[Not Available]	7th	T1b	N1	MX	Stage IIA	[Not Applicable]	[Not Applicable]	[Not Applicable]	[Not Applicable]	YES	73	80	80	84	52	NO	[Not Available]	[Not Available]	[Not Available]	[Not Available]	[Not Available]	[Not Available]	2	No	1970	[Not Available]	20	[Not Available]	Dead	[Not Available]	[Not Available]	[Not Available]	[Not Available]
TCGA-44-7670	1/18/12	Lung Adenocarcinoma	YES	NO	Female	Lung	WHITE	HISPANIC OR LATINO	[Not Available]	Yes	L-Upper	[Not Available]	2010	[Not Available]	[Not Available]	[Not Available]	7th	T1b	N1	M0	Stage IIA	[Not Applicable]	[Not Applicable]	[Not Applicable]	[Not Applicable]	YES	80	82	86	90	50	[Not Available]	[Not Available]	[Not Available]	[Not Available]	[Not Available]	[Not Available]	[Not Available]	2	No	1980	[Not Available]	30	[Not Available]	Alive	[Not Available]	[Not Available]	[Not Available]	[Not Available]
TCGA-44-7671	1/17/12	Lung Adenocarcinoma	YES	NO	Male	Lung	BLACK OR AFRICAN AMERICAN	NOT HISPANIC OR LATINO	[Not Available]	Yes	[Not Available]	[Not Available]	2010	[Not Available]	[Not Available]	[Not Available]	7th	T2a	N0	M0	Stage IB	[Not Applicable]	[Not Applicable]	[Not Applicable]	[Not Applicable]	YES	76	82	97	103	65	[Not Available]	[Not Available]	[Not Available]	[Not Available]	[Not Available]	[Not Available]	[Not Available]	3	No	[Not Available]	1995	[Not Available]	[Not Available]	Alive	[Not Available]	[Not Available]	[Not Available]	[Not Available]
TCGA-44-7672	2001-10-12	Lung Adenocarcinoma	YES	NO	Female	Lung	WHITE	NOT HISPANIC OR LATINO	[Not Available]	No	L-Upper	[Not Available]	2010	[Not Available]	[Not Available]	[Not Available]	7th	T1b	N0	M0	Stage IA	[Not Applicable]	[Not Applicable]	[Not Applicable]	[Not Applicable]	YES	105	[Not Available]	90	[Not Available]	82	[Not Available]	[Not Available]	[Not Available]	[Not Available]	[Not Available]	[Not Available]	[Not Available]	2	No	1980	[Not Available]	20	[Not Available]	Alive	[Not Available]	[Not Available]	[Not Available]	[Not Available]
TCGA-44-8117	2006-11-12	Lung Adenocarcinoma	YES	NO	Female	Lung	WHITE	NOT HISPANIC OR LATINO	[Not Available]	No	R-Upper	[Not Available]	2011	[Not Available]	[Not Available]	[Not Available]	7th	T2a	N0	M0	Stage IB	[Not Applicable]	[Not Applicable]	[Not Applicable]	[Not Applicable]	YES	60	65	83	88	86	[Not Available]	[Not Available]	[Not Available]	[Not Available]	[Not Available]	[Not Available]	[Not Available]	4	No	1975	2011	54	[Not Available]	Alive	1	Pre-Adjuvant Therapy	NO	[Not Available]
TCGA-44-8119	5/31/12	Lung Adenocarcinoma	YES	NO	Male	Lung	WHITE	NOT HISPANIC OR LATINO	[Not Available]	Yes, History of Prior Malignancy	R-Upper	[Not Available]	2012	[Not Available]	[Not Available]	[Not Available]	7th	T3	N0	M0	Stage IIB	[Not Applicable]	[Not Applicable]	[Not Applicable]	[Not Applicable]	YES	55	59	73	74	40	[Not Available]	[Not Available]	[Not Available]	[Not Available]	[Not Available]	[Not Available]	[Not Available]	2	No	1961	[Not Available]	50	[Not Available]	Alive	0	Preoperative	NO	[Not Available]
TCGA-44-8120	5/31/12	Lung Adenocarcinoma	YES	NO	Male	Lung	BLACK OR AFRICAN AMERICAN	NOT HISPANIC OR LATINO	[Not Available]	No	R-Upper	[Not Available]	2011	[Not Available]	[Not Available]	[Not Available]	7th	T2a	N0	M0	Stage IB	[Not Applicable]	[Not Applicable]	[Not Applicable]	[Not Applicable]	YES	97	101	98	100	[Not Available]	[Not Available]	[Not Available]	[Not Available]	[Not Available]	[Not Available]	[Not Available]	[Not Available]	5	No	1981	[Not Available]	30	[Not Available]	Alive	0	Preoperative	NO	[Not Available]
TCGA-44-A479	11/28/12	Lung Adenocarcinoma	YES	NO	Female	Lung	BLACK OR AFRICAN AMERICAN	NOT HISPANIC OR LATINO	[Not Available]	No	R-Upper	[Not Available]	2012	[Not Available]	[Not Available]	R0	7th	T2	N0	MX	Stage IB	[Not Applicable]	[Not Applicable]	[Not Applicable]	[Not Applicable]	YES	102	[Not Available]	115	[Not Available]	60	NO	[Not Available]	[Not Available]	YES	[Not Available]	NO	[Not Available]	4	No	1962	2002	40	[Not Available]	Alive	0	Preoperative	NO	[Not Available]
TCGA-44-A47A	11/27/12	Lung Adenocarcinoma	YES	NO	Female	Lung	WHITE	NOT HISPANIC OR LATINO	[Not Available]	No	R-Upper	[Not Available]	2012	[Not Available]	[Not Available]	R0	7th	T2a	N0	MX	Stage IB	[Not Applicable]	[Not Applicable]	[Not Applicable]	[Not Applicable]	NO	[Not Available]	[Not Available]	[Not Available]	[Not Available]	[Not Available]	NO	[Not Available]	[Not Available]	NO	[Not Available]	NO	[Not Available]	4	No	1970	2010	80	[Not Available]	Alive	1	Preoperative	NO	[Not Available]
TCGA-44-A47B	11/20/12	Lung Adenocarcinoma	YES	NO	Male	Lung	WHITE	NOT HISPANIC OR LATINO	[Not Available]	No	R-Upper	[Not Available]	2012	[Not Available]	[Not Available]	R0	7th	T2a	N0	M0	Stage IB	[Not Applicable]	[Not Applicable]	[Not Applicable]	[Not Applicable]	YES	96	96	98	102	73	NO	[Not Available]	[Not Available]	NO	[Not Available]	NO	[Not Available]	3	No	1956	1965	4.5	[Not Available]	Alive	0	Preoperative	NO	[Not Available]
TCGA-44-A47F	11/23/12	Lung Adenocarcinoma	YES	NO	Male	Lung	WHITE	NOT HISPANIC OR LATINO	[Not Available]	Yes, History of Prior Malignancy	L-Upper	[Not Available]	2012	[Not Available]	[Not Available]	[Not Available]	7th	T2b	N1	M0	Stage IIB	[Not Applicable]	[Not Applicable]	[Not Applicable]	[Not Applicable]	YES	81	84	122	127	[Not Available]	[Not Available]	[Not Available]	[Not Available]	[Not Available]	[Not Available]	[Not Available]	[Not Available]	3	No	1955	1987	20	[Not Available]	Alive	0	Preoperative	NO	[Not Available]
TCGA-44-A47G	11/27/12	Lung Adenocarcinoma	YES	NO	Female	Lung	WHITE	NOT HISPANIC OR LATINO	[Not Available]	No	R-Upper	[Not Available]	2012	[Not Available]	[Not Available]	R0	7th	T1	N0	M0	Stage IA	[Not Applicable]	[Not Applicable]	[Not Applicable]	[Not Applicable]	YES	100	[Not Available]	113	[Not Available]	85	NO	[Not Available]	[Not Available]	NO	[Not Available]	NO	[Not Available]	4	No	1956	2012	28	[Not Available]	Alive	0	Preoperative	NO	[Not Available]
TCGA-44-A4SS	1/28/13	Lung Adenocarcinoma	YES	NO	Male	Lung	WHITE	NOT HISPANIC OR LATINO	[Not Available]	No	L-Upper	[Not Available]	2012	[Not Available]	[Not Available]	[Not Available]	7th	T1b	N0	M0	Stage IA	[Not Applicable]	[Not Applicable]	[Not Applicable]	[Not Applicable]	YES	69	71	86	88	54	[Not Available]	[Not Available]	[Not Available]	[Not Available]	[Not Available]	[Not Available]	[Not Available]	4	No	1952	2012	90	[Not Available]	Alive	0	Preoperative	NO	[Not Available]
TCGA-44-A4SU	1/29/13	Lung Adenocarcinoma	YES	NO	Female	Lung	WHITE	NOT HISPANIC OR LATINO	[Not Available]	No	R-Lower	[Not Available]	2012	[Not Available]	[Not Available]	R0	7th	T1a	N0	MX	Stage IA	[Not Applicable]	[Not Applicable]	[Not Applicable]	[Not Applicable]	YES	88	95	100	100	74	[Not Available]	[Not Available]	[Not Available]	[Not Available]	[Not Available]	[Not Available]	[Not Available]	4	No	1961	2011	50	[Not Available]	Dead	1	Preoperative	NO	[Not Available]
TCGA-49-4486	2002-03-11	Lung Adenocarcinoma	NO	YES	Male	Lung	WHITE	NOT HISPANIC OR LATINO	[Not Available]	No	R-Lower	[Not Available]	1992	[Not Available]	[Not Available]	R0	3rd	T1	N0	M0	Stage IA	[Not Applicable]	[Not Applicable]	[Not Applicable]	[Not Applicable]	YES	108	96	77	69	[Not Available]	[Not Available]	[Not Available]	[Not Available]	[Not Available]	[Not Available]	[Not Available]	[Not Available]	3	No	1932	1967	17.5	[Not Available]	Dead	1	Other	[Not Available]	[Not Available]
TCGA-49-4487	2008-09-11	Lung Adenocarcinoma	NO	YES	Female	Lung	WHITE	NOT HISPANIC OR LATINO	[Not Available]	No	L-Upper	[Not Available]	1992	[Not Available]	[Not Available]	R0	3rd	T1	N0	M0	Stage IA	[Not Applicable]	[Not Applicable]	[Not Applicable]	[Not Applicable]	[Not Available]	[Not Available]	[Not Available]	[Not Available]	[Not Available]	[Not Available]	[Not Available]	[Not Available]	[Not Available]	[Not Available]	[Not Available]	[Not Available]	[Not Available]	4	No	[Not Available]	[Not Available]	40	[Not Available]	Dead	[Not Available]	[Not Available]	[Not Available]	[Not Available]
TCGA-49-4488	2008-09-11	Lung Adenocarcinoma	NO	YES	Female	Lung	WHITE	NOT HISPANIC OR LATINO	[Not Available]	No	L-Lower	[Not Available]	1992	[Not Available]	[Not Available]	R0	3rd	T1	N0	MX	Stage IA	[Not Applicable]	[Not Applicable]	[Not Applicable]	[Not Applicable]	[Not Available]	[Not Available]	[Not Available]	[Not Available]	[Not Available]	[Not Available]	[Not Available]	[Not Available]	[Not Available]	[Not Available]	[Not Available]	[Not Available]	[Not Available]	3	No	[Not Available]	1964	[Not Available]	[Not Available]	Dead	[Not Available]	[Not Available]	[Not Available]	[Not Available]
TCGA-49-4490	2008-09-11	Lung Adenocarcinoma	NO	YES	Female	Lung	WHITE	NOT HISPANIC OR LATINO	[Not Available]	No	L-Upper	[Not Available]	1993	[Not Available]	[Not Available]	[Not Available]	4th	T3	N2	M0	Stage IIIA	[Not Applicable]	[Not Applicable]	[Not Applicable]	[Not Applicable]	[Not Available]	[Not Available]	[Not Available]	[Not Available]	[Not Available]	[Not Available]	[Not Available]	[Not Available]	[Not Available]	[Not Available]	[Not Available]	[Not Available]	[Not Available]	3	No	[Not Available]	[Not Available]	5	[Not Available]	Dead	[Not Available]	[Not Available]	[Not Available]	[Not Available]
TCGA-49-4494	2002-03-11	Lung Adenocarcinoma	NO	YES	Male	Lung	WHITE	NOT HISPANIC OR LATINO	[Not Available]	No	L-Upper	[Not Available]	1995	[Not Available]	[Not Available]	R0	4th	T3	N2	M0	Stage IIIA	[Not Applicable]	[Not Applicable]	[Not Applicable]	[Not Applicable]	NO	[Not Available]	[Not Available]	[Not Available]	[Not Available]	[Not Available]	[Not Available]	[Not Available]	[Not Available]	[Not Available]	[Not Available]	[Not Available]	[Not Available]	3	No	1930	1955	50	[Not Available]	Dead	1	Pre-Adjuvant Therapy	[Not Available]	[Not Available]
TCGA-49-4501	2002-02-11	Lung Adenocarcinoma	NO	YES	Female	Lung	WHITE	NOT HISPANIC OR LATINO	[Not Available]	Yes	R-Upper	[Not Available]	1996	[Not Available]	[Not Available]	R0	[Not Available]	T2	N0	M0	Stage IB	[Not Applicable]	[Not Applicable]	[Not Applicable]	[Not Applicable]	[Not Available]	[Not Available]	[Not Available]	[Not Available]	[Not Available]	[Not Available]	[Not Available]	[Not Available]	[Not Available]	[Not Available]	[Not Available]	[Not Available]	[Not Available]	1	No	[Not Available]	[Not Available]	[Not Available]	[Not Available]	Dead	1	Preoperative	[Not Available]	[Not Available]
TCGA-49-4505	2002-03-11	Lung Adenocarcinoma	NO	YES	Female	Lung	WHITE	NOT HISPANIC OR LATINO	[Not Available]	No	R-Lower	[Not Available]	1996	[Not Available]	[Not Available]	R0	4th	T2	N1	M0	Stage IIB	[Not Applicable]	[Not Applicable]	[Not Applicable]	[Not Applicable]	NO	[Not Available]	[Not Available]	[Not Available]	[Not Available]	[Not Available]	[Not Available]	[Not Available]	[Not Available]	[Not Available]	[Not Available]	[Not Available]	[Not Available]	4	No	1949	1986	74	[Not Available]	Dead	3	Pre-Adjuvant Therapy	[Not Available]	[Not Available]
TCGA-49-4506	2002-03-11	Lung Adenocarcinoma	NO	YES	Female	Lung	WHITE	NOT HISPANIC OR LATINO	[Not Available]	No	L-Upper	Peripheral Lung	1997	[Not Available]	[Not Available]	R1	4th	T2	N1	M0	Stage IIB	[Not Applicable]	[Not Applicable]	[Not Applicable]	[Not Applicable]	NO	[Not Available]	[Not Available]	[Not Available]	[Not Available]	[Not Available]	[Not Available]	[Not Available]	[Not Available]	[Not Available]	[Not Available]	[Not Available]	[Not Available]	2	No	[Not Available]	[Not Available]	100	[Not Available]	Dead	1	Pre-Adjuvant Therapy	[Not Available]	[Not Available]
TCGA-49-4507	2002-02-11	Lung Adenocarcinoma	NO	YES	Female	Lung	WHITE	NOT HISPANIC OR LATINO	[Not Available]	No	[Discrepancy]	[Not Available]	1997	[Not Available]	[Not Available]	R0	[Not Available]	T3	N1	M0	Stage IIIA	[Not Applicable]	[Not Applicable]	[Not Applicable]	[Not Applicable]	[Not Available]	[Not Available]	[Not Available]	[Not Available]	[Not Available]	[Not Available]	[Not Available]	[Not Available]	[Not Available]	[Not Available]	[Not Available]	[Not Available]	[Not Available]	4	No	[Not Available]	1991	78	[Not Available]	Dead	1	Preoperative	[Not Available]	[Not Available]
TCGA-49-4510	2002-03-11	Lung Adenocarcinoma	NO	YES	Female	Lung	BLACK OR AFRICAN AMERICAN	NOT HISPANIC OR LATINO	[Not Available]	No	L-Upper	[Not Available]	2001	[Not Available]	[Not Available]	R0	5th	T2	N1	M0	Stage IIB	[Not Applicable]	[Not Applicable]	[Not Applicable]	[Not Applicable]	NO	[Not Available]	[Not Available]	[Not Available]	[Not Available]	[Not Available]	[Not Available]	[Not Available]	[Not Available]	[Not Available]	[Not Available]	[Not Available]	[Not Available]	2	No	[Not Available]	[Not Available]	55.5	[Not Available]	Dead	1	Pre-Adjuvant Therapy	[Not Available]	[Not Available]
TCGA-49-4512	2008-09-11	Lung Adenocarcinoma	NO	YES	Female	Lung	WHITE	NOT HISPANIC OR LATINO	[Not Available]	No	R-Middle	[Not Available]	2007	[Not Available]	[Not Available]	R1	6th	T2	N2	MX	Stage IIIA	[Not Applicable]	[Not Applicable]	[Not Applicable]	[Not Applicable]	[Not Available]	[Not Available]	[Not Available]	[Not Available]	[Not Available]	[Not Available]	[Not Available]	[Not Available]	[Not Available]	[Not Available]	[Not Available]	[Not Available]	[Not Available]	1	No	[Not Available]	[Not Available]	[Not Available]	[Not Available]	Dead	[Not Available]	[Not Available]	[Not Available]	[Not Available]
TCGA-49-4514	2008-09-11	Lung Adenocarcinoma	NO	YES	Female	Lung	WHITE	[Not Available]	[Not Available]	No	L-Upper	[Not Available]	2007	[Not Available]	[Not Available]	R0	6th	T1	N0	M0	Stage IA	[Not Applicable]	[Not Applicable]	[Not Applicable]	[Not Applicable]	[Not Available]	[Not Available]	[Not Available]	[Not Available]	[Not Available]	[Not Available]	[Not Available]	[Not Available]	[Not Available]	[Not Available]	[Not Available]	[Not Available]	[Not Available]	3	No	[Not Available]	[Not Available]	65	[Not Available]	Alive	[Not Available]	[Not Available]	[Not Available]	[Not Available]
TCGA-49-6742	2008-09-11	Lung Adenocarcinoma	NO	YES	Male	Lung	WHITE	NOT HISPANIC OR LATINO	[Not Available]	Yes	L-Upper	[Not Available]	2010	[Not Available]	[Not Available]	R0	7th	T2a	N1	M0	Stage IIA	[Not Applicable]	[Not Applicable]	[Not Applicable]	[Not Applicable]	[Not Available]	[Not Available]	[Not Available]	[Not Available]	[Not Available]	[Not Available]	YES	NO	[Not Available]	[Not Available]	[Not Available]	[Not Available]	[Not Available]	3	No	[Not Available]	[Not Available]	10	[Not Available]	Dead	[Not Available]	[Not Available]	[Not Available]	[Not Available]
TCGA-49-6743	2008-10-11	Lung Adenocarcinoma	NO	YES	Female	Lung	WHITE	[Not Available]	[Not Available]	No	R-Upper	[Not Available]	2010	[Not Available]	[Not Available]	[Not Available]	7th	T1	N2	MX	Stage IIIA	[Not Applicable]	[Not Applicable]	[Not Applicable]	[Not Applicable]	[Not Available]	[Not Available]	[Not Available]	[Not Available]	[Not Available]	[Not Available]	[Not Available]	[Not Available]	[Not Available]	[Not Available]	[Not Available]	[Not Available]	[Not Available]	4	No	[Not Available]	[Not Available]	50	[Not Available]	Alive	[Not Available]	[Not Available]	[Not Available]	[Not Available]
TCGA-49-6744	2008-10-11	Lung Adenocarcinoma	NO	YES	Female	Lung	WHITE	[Not Available]	[Not Available]	No	L-Upper	[Not Available]	2010	[Not Available]	[Not Available]	R0	7th	T2a	N1	MX	Stage IIA	[Not Applicable]	[Not Applicable]	[Not Applicable]	[Not Applicable]	[Not Available]	[Not Available]	[Not Available]	[Not Available]	[Not Available]	[Not Available]	YES	YES	[Not Available]	[Not Available]	[Not Available]	[Not Available]	[Not Available]	4	No	[Not Available]	[Not Available]	20	[Not Available]	Alive	[Not Available]	[Not Available]	[Not Available]	[Not Available]
TCGA-49-6745	2008-11-11	Lung Adenocarcinoma	NO	YES	Male	Lung	WHITE	[Not Available]	[Not Available]	Yes	L-Upper	[Not Available]	2011	[Not Available]	[Not Available]	[Not Available]	7th	T2a	N2	M0	Stage IIIA	[Not Applicable]	[Not Applicable]	[Not Applicable]	[Not Applicable]	[Not Available]	[Not Available]	[Not Available]	[Not Available]	[Not Available]	[Not Available]	YES	NO	[Not Available]	YES	[Not Available]	[Not Available]	[Not Available]	4	No	[Not Available]	[Not Available]	20	[Not Available]	Alive	[Not Available]	[Not Available]	[Not Available]	[Not Available]
TCGA-49-6761	2003-02-12	Lung Adenocarcinoma	NO	YES	Female	Lung	WHITE	NOT HISPANIC OR LATINO	[Not Available]	Yes	R-Upper	[Not Available]	2009	[Not Available]	[Not Available]	R0	6th	T1	N2	MX	Stage IIIA	[Not Applicable]	[Not Applicable]	[Not Applicable]	[Not Applicable]	YES	52	56	64	64	1	[Not Available]	[Not Available]	[Not Available]	[Not Available]	[Not Available]	[Not Available]	[Not Available]	4	No	[Not Available]	[Not Available]	50	[Not Available]	Alive	[Not Available]	[Not Available]	[Not Available]	[Not Available]
TCGA-49-6767	2008-10-11	Lung Adenocarcinoma	NO	YES	Female	Lung	WHITE	[Not Available]	[Not Available]	No	R-Middle	[Not Available]	2010	[Not Available]	[Not Available]	R0	7th	T3	N0	MX	Stage IIB	[Not Applicable]	[Not Applicable]	[Not Applicable]	[Not Applicable]	NO	[Not Available]	[Not Available]	[Not Available]	[Not Available]	[Not Available]	[Not Available]	[Not Available]	[Not Available]	[Not Available]	[Not Available]	[Not Available]	[Not Available]	2	No	[Not Available]	[Not Available]	30	[Not Available]	Alive	[Not Available]	[Not Available]	[Not Available]	[Not Available]
TCGA-49-AAQV	6/13/14	Lung Adenocarcinoma	NO	YES	Female	Lung	BLACK OR AFRICAN AMERICAN	NOT HISPANIC OR LATINO	[Not Available]	No	L-Lower	[Not Available]	2012	[Not Available]	[Not Available]	R0	7th	T1	N1	MX	Stage II	[Not Applicable]	[Not Applicable]	[Not Applicable]	[Not Applicable]	YES	83.3	81.7	78.8	77.29	95.5	[Not Available]	[Not Available]	[Not Available]	YES	Exon 19 Deletion	YES	FISH	1	No	[Not Available]	[Not Available]	[Not Available]	90	Dead	1	Preoperative	NO	[Not Available]
TCGA-49-AAR0	6/18/14	Lung Adenocarcinoma	NO	YES	Male	Lung	BLACK OR AFRICAN AMERICAN	NOT HISPANIC OR LATINO	[Not Available]	Yes, History of Prior Malignancy	R-Upper	[Not Available]	2002	[Not Available]	[Not Available]	R0	5th	T1	N0	MX	Stage IA	[Not Applicable]	[Not Applicable]	[Not Applicable]	[Not Applicable]	YES	85.4	62.5	58.6	80	107	[Not Available]	[Not Available]	[Not Available]	[Not Available]	[Not Available]	[Not Available]	[Not Available]	2	No	[Not Available]	[Not Available]	37	90	Alive	1	Preoperative	NO	[Not Available]
TCGA-49-AAR2	6/18/14	Lung Adenocarcinoma	NO	YES	Male	Lung	BLACK OR AFRICAN AMERICAN	NOT HISPANIC OR LATINO	[Not Available]	No	R-Lower	[Not Available]	2009	[Not Available]	[Not Available]	R0	6th	T2	N0	MX	Stage IB	[Not Applicable]	[Not Applicable]	[Not Applicable]	[Not Applicable]	YES	80	79.5	78.6	78.2	105.8	[Not Available]	[Not Available]	[Not Available]	[Not Available]	[Not Available]	[Not Available]	[Not Available]	4	No	[Not Available]	2006	[Not Available]	90	Alive	1	Preoperative	NO	[Not Available]
TCGA-49-AAR3	6/18/14	Lung Adenocarcinoma	NO	YES	Male	Lung	BLACK OR AFRICAN AMERICAN	NOT HISPANIC OR LATINO	[Not Available]	No	R-Upper	[Not Available]	2008	[Not Available]	[Not Available]	R0	6th	T2	N1	MX	Stage IIB	[Not Applicable]	[Not Applicable]	[Not Applicable]	[Not Applicable]	NO	[Not Available]	[Not Available]	[Not Available]	[Not Available]	[Not Available]	[Not Available]	[Not Available]	[Not Available]	[Not Available]	[Not Available]	[Not Available]	[Not Available]	[Not Available]	No	[Not Available]	[Not Available]	[Not Available]	90	Alive	1	Preoperative	NO	[Not Available]
TCGA-49-AAR4	6/18/14	Lung Adenocarcinoma	NO	YES	Male	Lung	BLACK OR AFRICAN AMERICAN	NOT HISPANIC OR LATINO	[Not Available]	No	L-Upper	[Not Available]	2006	[Not Available]	[Not Available]	R0	6th	T2	N2	MX	Stage IIIA	[Not Applicable]	[Not Applicable]	[Not Applicable]	[Not Applicable]	YES	100.2	97.5	81.2	79	109.4	[Not Available]	[Not Available]	[Not Available]	[Not Available]	[Not Available]	[Not Available]	[Not Available]	2	No	[Not Available]	[Not Available]	35	80	Dead	1	Preoperative	YES	[Not Available]
TCGA-49-AAR9	6/18/14	Lung Adenocarcinoma	NO	YES	Male	Lung	BLACK OR AFRICAN AMERICAN	NOT HISPANIC OR LATINO	[Not Available]	No	Other (please specify)	[Not Available]	1999	[Not Available]	[Not Available]	R0	5th	T3	N0	MX	Stage IIB	[Not Applicable]	[Not Applicable]	[Not Applicable]	[Not Applicable]	NO	[Not Available]	[Not Available]	[Not Available]	[Not Available]	[Not Available]	[Not Available]	[Not Available]	[Not Available]	[Not Available]	[Not Available]	[Not Available]	[Not Available]	2	No	[Not Available]	[Not Available]	[Not Available]	80	Dead	1	Preoperative	NO	[Not Available]
TCGA-49-AARE	6/19/14	Lung Adenocarcinoma	NO	YES	Female	Lung	BLACK OR AFRICAN AMERICAN	NOT HISPANIC OR LATINO	[Not Available]	No	R-Upper	[Not Available]	1999	[Not Available]	[Not Available]	R0	5th	T1	N0	MX	Stage IA	[Not Applicable]	[Not Applicable]	[Not Applicable]	[Not Applicable]	YES	61.2	41.7	81	55.2	107.2	[Not Available]	[Not Available]	[Not Available]	[Not Available]	[Not Available]	[Not Available]	[Not Available]	4	No	1980	1995	15	90	Dead	1	Other	NO	[Not Available]
TCGA-49-AARN	6/19/14	Lung Adenocarcinoma	NO	YES	Female	Lung	BLACK OR AFRICAN AMERICAN	NOT HISPANIC OR LATINO	[Not Available]	Yes, History of Synchronous/Bilateral Malignancy	R-Lower	[Not Available]	2000	[Not Available]	[Not Available]	R0	5th	T1	N0	MX	Stage IA	[Not Applicable]	[Not Applicable]	[Not Applicable]	[Not Applicable]	YES	94.4	101.1	80.2	85.9	110.6	[Not Available]	[Not Available]	[Not Available]	[Not Available]	[Not Available]	[Not Available]	[Not Available]	5	No	[Not Available]	[Not Available]	[Not Available]	90	Dead	1	Preoperative	NO	[Not Available]
TCGA-49-AARO	6/19/14	Lung Adenocarcinoma	NO	YES	Female	Lung	BLACK OR AFRICAN AMERICAN	NOT HISPANIC OR LATINO	[Not Available]	No	L-Upper	[Not Available]	2003	[Not Available]	[Not Available]	R0	6th	T1a	N0	MX	Stage IA	[Not Applicable]	[Not Applicable]	[Not Applicable]	[Not Applicable]	YES	83	83.9	83.6	84.4	103.3	[Not Available]	[Not Available]	[Not Available]	[Not Available]	[Not Available]	[Not Available]	[Not Available]	2	No	[Not Available]	[Not Available]	[Not Available]	90	Alive	1	Preoperative	NO	[Not Available]
TCGA-49-AARQ	6/19/14	Lung Adenocarcinoma	NO	YES	Female	Lung	BLACK OR AFRICAN AMERICAN	NOT HISPANIC OR LATINO	[Not Available]	No	R-Upper	[Not Available]	1996	[Not Available]	[Not Available]	R0	4th	T2	N0	MX	Stage I	[Not Applicable]	[Not Applicable]	[Not Applicable]	[Not Applicable]	YES	82.2	56.1	83.2	56.8	99.9	[Not Available]	[Not Available]	[Not Available]	[Not Available]	[Not Available]	[Not Available]	[Not Available]	4	No	[Not Available]	2007	60	90	Alive	1	Preoperative	NO	[Not Available]
TCGA-49-AARR	6/19/14	Lung Adenocarcinoma	NO	YES	Male	Lung	BLACK OR AFRICAN AMERICAN	NOT HISPANIC OR LATINO	[Not Available]	No	L-Upper	[Not Available]	2001	[Not Available]	[Not Available]	R0	5th	T1	N0	MX	Stage IA	[Not Applicable]	[Not Applicable]	[Not Applicable]	[Not Applicable]	YES	80.3	78.8	77.8	76.3	103.5	[Not Available]	[Not Available]	[Not Available]	[Not Available]	[Not Available]	[Not Available]	[Not Available]	3	No	[Not Available]	1987	[Not Available]	90	Alive	1	Preoperative	NO	[Not Available]
TCGA-4B-A93V	2011-11-14	Lung Adenocarcinoma	YES	NO	Female	Lung	BLACK OR AFRICAN AMERICAN	NOT HISPANIC OR LATINO	[Not Available]	No	R-Lower	Peripheral Lung	2013	[Not Available]	[Not Available]	R0	7th	T1b	N0	M0	Stage IA	[Not Applicable]	[Not Applicable]	[Not Applicable]	[Not Applicable]	NO	[Not Available]	[Not Available]	[Not Available]	[Not Available]	[Not Available]	[Not Available]	[Not Available]	[Not Available]	[Not Available]	[Not Available]	[Not Available]	[Not Available]	4	No	1984	2013	30	100	Dead	0	Preoperative	YES	[Not Available]
TCGA-50-5044	8/25/11	Lung Adenocarcinoma	NO	YES	Female	Lung	WHITE	NOT HISPANIC OR LATINO	[Not Available]	No	R-Lower	[Not Available]	2002	[Not Available]	[Not Available]	[Not Available]	5th	T4	N1	M0	Stage IIIB	[Not Applicable]	[Not Applicable]	[Not Applicable]	[Not Applicable]	[Not Available]	[Not Available]	[Not Available]	[Not Available]	[Not Available]	[Not Available]	[Not Available]	[Not Available]	[Not Available]	[Not Available]	[Not Available]	[Not Available]	[Not Available]	[Not Available]	No	[Not Available]	[Not Available]	[Not Available]	[Not Available]	Dead	[Not Available]	[Not Available]	[Not Available]	[Not Available]
TCGA-50-5045	6/30/11	Lung Adenocarcinoma	NO	YES	Female	Lung	BLACK OR AFRICAN AMERICAN	NOT HISPANIC OR LATINO	[Not Available]	No	R-Lower	[Not Available]	2004	[Not Available]	[Not Available]	[Not Available]	6th	T2	N1	M0	[Discrepancy]	[Not Applicable]	[Not Applicable]	[Not Applicable]	[Not Applicable]	[Not Available]	[Not Available]	[Not Available]	[Not Available]	[Not Available]	[Not Available]	[Not Available]	[Not Available]	[Not Available]	[Not Available]	[Not Available]	[Not Available]	[Not Available]	[Not Available]	No	[Not Available]	[Not Available]	[Not Available]	[Not Available]	Dead	[Not Available]	[Not Available]	[Not Available]	[Not Available]
TCGA-50-5049	8/25/11	Lung Adenocarcinoma	NO	YES	Male	Lung	WHITE	NOT HISPANIC OR LATINO	[Not Available]	No	R-Upper	[Not Available]	2006	[Not Available]	[Not Available]	[Not Available]	6th	T2	N0	M0	Stage IA	[Not Applicable]	[Not Applicable]	[Not Applicable]	[Not Applicable]	NO	[Not Available]	[Not Available]	[Not Available]	[Not Available]	[Not Available]	YES	NO	[Not Available]	YES	[Not Available]	[Not Available]	[Not Available]	[Not Available]	No	[Not Available]	[Not Available]	[Not Available]	[Not Available]	Alive	[Not Available]	[Not Available]	[Not Available]	[Not Available]
TCGA-50-5051	8/25/11	Lung Adenocarcinoma	NO	YES	Female	Lung	WHITE	NOT HISPANIC OR LATINO	[Not Available]	No	L-Upper	[Not Available]	2007	[Not Available]	[Not Available]	R0	6th	T2	N2	M0	Stage IIIA	[Not Applicable]	[Not Applicable]	[Not Applicable]	[Not Applicable]	[Not Available]	[Not Available]	[Not Available]	[Not Available]	[Not Available]	[Not Available]	YES	YES	Other	YES	[Not Available]	[Not Available]	[Not Available]	4	No	[Not Available]	2006	30	[Not Available]	Dead	[Not Available]	[Not Available]	[Not Available]	[Not Available]
TCGA-50-5055	2007-02-11	Lung Adenocarcinoma	NO	YES	Female	Lung	WHITE	NOT HISPANIC OR LATINO	[Not Available]	No	L-Lower	[Not Available]	2008	[Not Available]	[Not Available]	R0	6th	T1	N1	M0	Stage IIA	[Not Applicable]	[Not Applicable]	[Not Applicable]	[Not Applicable]	[Not Available]	[Not Available]	[Not Available]	[Not Available]	[Not Available]	[Not Available]	YES	NO	[Not Available]	YES	[Not Available]	[Not Available]	[Not Available]	[Not Available]	No	[Not Available]	[Not Available]	[Not Available]	[Not Available]	Dead	[Not Available]	[Not Available]	[Not Available]	[Not Available]
TCGA-50-5066	2007-02-11	Lung Adenocarcinoma	NO	YES	Male	Lung	BLACK OR AFRICAN AMERICAN	NOT HISPANIC OR LATINO	[Not Available]	No	R-Upper	[Not Available]	2009	[Not Available]	[Not Available]	R0	6th	T2	N0	M0	Stage IB	[Not Applicable]	[Not Applicable]	[Not Applicable]	[Not Applicable]	NO	[Not Available]	[Not Available]	[Not Available]	[Not Available]	[Not Available]	YES	NO	[Not Available]	YES	[Not Available]	YES	[Not Available]	1	No	[Not Available]	[Not Available]	[Not Available]	[Not Available]	Alive	[Not Available]	[Not Available]	[Not Available]	[Not Available]
TCGA-50-5068	2007-02-11	Lung Adenocarcinoma	NO	YES	Female	Lung	WHITE	NOT HISPANIC OR LATINO	[Not Available]	No	R-Lower	[Not Available]	2003	[Not Available]	[Not Available]	[Not Available]	6th	T2	N1	MX	Stage IIB	[Not Applicable]	[Not Applicable]	[Not Applicable]	[Not Applicable]	[Not Available]	[Not Available]	[Not Available]	[Not Available]	[Not Available]	[Not Available]	[Not Available]	[Not Available]	[Not Available]	[Not Available]	[Not Available]	[Not Available]	[Not Available]	[Not Available]	No	[Not Available]	[Not Available]	[Not Available]	[Not Available]	Dead	[Not Available]	[Not Available]	[Not Available]	[Not Available]
TCGA-50-5072	8/26/11	Lung Adenocarcinoma	NO	YES	Male	Lung	WHITE	NOT HISPANIC OR LATINO	[Not Available]	No	L-Upper	[Not Available]	2009	[Not Available]	[Not Available]	[Not Available]	6th	T2	N2	M0	Stage IIIA	[Not Applicable]	[Not Applicable]	[Not Applicable]	[Not Applicable]	NO	[Not Available]	[Not Available]	[Not Available]	[Not Available]	[Not Available]	YES	[Not Available]	[Not Available]	YES	[Not Available]	YES	[Not Available]	3	Yes	[Not Available]	1974	15	[Not Available]	Dead	[Not Available]	[Not Available]	[Not Available]	[Not Available]
TCGA-50-5930	6/29/11	Lung Adenocarcinoma	NO	YES	Male	Lung	WHITE	NOT HISPANIC OR LATINO	[Not Available]	No	[Discrepancy]	[Not Available]	2001	[Not Available]	[Not Available]	[Not Available]	5th	T2	N2	M0	Stage IIIA	[Not Applicable]	[Not Applicable]	[Not Applicable]	[Not Applicable]	[Not Available]	[Not Available]	[Not Available]	[Not Available]	[Not Available]	[Not Available]	[Not Available]	[Not Available]	[Not Available]	[Not Available]	[Not Available]	[Not Available]	[Not Available]	[Not Available]	No	[Not Available]	[Not Available]	[Not Available]	[Not Available]	Dead	[Not Available]	[Not Available]	[Not Available]	[Not Available]
TCGA-50-5931	2007-02-11	Lung Adenocarcinoma	NO	YES	Female	Lung	WHITE	NOT HISPANIC OR LATINO	[Not Available]	No	L-Upper	Central Lung	2001	[Not Available]	[Not Available]	R0	5th	T2	N0	M0	Stage IB	[Not Applicable]	[Not Applicable]	[Not Applicable]	[Not Applicable]	[Not Available]	[Not Available]	[Not Available]	[Not Available]	[Not Available]	[Not Available]	[Not Available]	[Not Available]	[Not Available]	[Not Available]	[Not Available]	[Not Available]	[Not Available]	4	No	[Not Available]	[Not Available]	40	[Not Available]	Dead	[Not Available]	[Not Available]	[Not Available]	[Not Available]
TCGA-50-5932	2007-02-11	Lung Adenocarcinoma	NO	YES	Male	Lung	WHITE	NOT HISPANIC OR LATINO	[Not Available]	Yes	R-Upper	Central Lung	2001	[Not Available]	[Not Available]	[Not Available]	5th	T2	N1	M0	Stage IIB	[Not Applicable]	[Not Applicable]	[Not Applicable]	[Not Applicable]	[Not Available]	[Not Available]	[Not Available]	[Not Available]	[Not Available]	[Not Available]	[Not Available]	[Not Available]	[Not Available]	[Not Available]	[Not Available]	[Not Available]	[Not Available]	[Not Available]	No	[Not Available]	[Not Available]	[Not Available]	[Not Available]	Dead	[Not Available]	[Not Available]	[Not Available]	[Not Available]
TCGA-50-5933	2007-02-11	Lung Adenocarcinoma	NO	YES	Male	Lung	WHITE	NOT HISPANIC OR LATINO	[Not Available]	No	L-Lower	Central Lung	2001	[Not Available]	[Not Available]	[Not Available]	5th	T4	N2	M0	Stage IIIB	[Not Applicable]	[Not Applicable]	[Not Applicable]	[Not Applicable]	[Not Available]	[Not Available]	[Not Available]	[Not Available]	[Not Available]	[Not Available]	[Not Available]	[Not Available]	[Not Available]	[Not Available]	[Not Available]	[Not Available]	[Not Available]	[Not Available]	No	[Not Available]	[Not Available]	[Not Available]	[Not Available]	Dead	[Not Available]	[Not Available]	[Not Available]	[Not Available]
TCGA-50-5935	2007-02-11	Lung Adenocarcinoma	NO	YES	Female	Lung	WHITE	NOT HISPANIC OR LATINO	[Not Available]	Yes	L-Upper	[Not Available]	2006	[Not Available]	[Not Available]	[Not Available]	6th	T1	N0	M0	Stage IA	[Not Applicable]	[Not Applicable]	[Not Applicable]	[Not Applicable]	[Not Available]	[Not Available]	[Not Available]	[Not Available]	[Not Available]	[Not Available]	YES	YES	[Not Available]	YES	Other	[Not Available]	[Not Available]	[Not Available]	No	[Not Available]	[Not Available]	[Not Available]	[Not Available]	Dead	[Not Available]	[Not Available]	[Not Available]	[Not Available]
TCGA-50-5936	2007-02-11	Lung Adenocarcinoma	NO	YES	Male	Lung	WHITE	NOT HISPANIC OR LATINO	[Not Available]	No	R-Lower	[Not Available]	2007	[Not Available]	[Not Available]	[Not Available]	6th	T2	N2	M0	Stage IIIA	[Not Applicable]	[Not Applicable]	[Not Applicable]	[Not Applicable]	[Not Available]	[Not Available]	[Not Available]	[Not Available]	[Not Available]	[Not Available]	YES	YES	G12C	YES	[Not Available]	[Not Available]	[Not Available]	[Not Available]	No	[Not Available]	[Not Available]	[Not Available]	[Not Available]	Dead	[Not Available]	[Not Available]	[Not Available]	[Not Available]
TCGA-50-5939	2007-02-11	Lung Adenocarcinoma	NO	YES	Male	Lung	WHITE	NOT HISPANIC OR LATINO	[Not Available]	No	R-Upper	[Not Available]	2008	[Not Available]	[Not Available]	[Not Available]	6th	T2	N0	M0	Stage IB	[Not Applicable]	[Not Applicable]	[Not Applicable]	[Not Applicable]	[Not Available]	[Not Available]	[Not Available]	[Not Available]	[Not Available]	[Not Available]	[Not Available]	[Not Available]	[Not Available]	[Not Available]	[Not Available]	[Not Available]	[Not Available]	3	No	[Not Available]	1968	15	[Not Available]	Dead	[Not Available]	[Not Available]	[Not Available]	[Not Available]
TCGA-50-5941	2007-02-11	Lung Adenocarcinoma	NO	YES	Female	Lung	WHITE	[Not Available]	[Not Available]	No	R-Upper	[Not Available]	2010	[Not Available]	[Not Available]	[Not Available]	7th	T2a	N2	M0	Stage IIIA	[Not Applicable]	[Not Applicable]	[Not Applicable]	[Not Applicable]	NO	[Not Available]	[Not Available]	[Not Available]	[Not Available]	[Not Available]	[Not Available]	[Not Available]	[Not Available]	[Not Available]	[Not Available]	[Not Available]	[Not Available]	2	No	[Not Available]	[Not Available]	25	[Not Available]	Alive	[Not Available]	[Not Available]	[Not Available]	[Not Available]
TCGA-50-5942	8/26/11	Lung Adenocarcinoma	NO	YES	Female	Lung	WHITE	NOT HISPANIC OR LATINO	[Not Available]	No	R-Upper	[Not Available]	2009	[Not Available]	[Not Available]	R0	7th	T1	N0	M0	Stage IA	[Not Applicable]	[Not Applicable]	[Not Applicable]	[Not Applicable]	NO	[Not Available]	[Not Available]	[Not Available]	[Not Available]	[Not Available]	[Not Available]	[Not Available]	[Not Available]	[Not Available]	[Not Available]	[Not Available]	[Not Available]	4	No	[Not Available]	2009	30	[Not Available]	Alive	[Not Available]	[Not Available]	[Not Available]	[Not Available]
TCGA-50-5944	2007-02-11	Lung Adenocarcinoma	NO	YES	Female	Lung	WHITE	[Not Available]	[Not Available]	No	R-Upper	[Not Available]	2010	[Not Available]	[Not Available]	R0	7th	T1	N0	M0	Stage IA	[Not Applicable]	[Not Applicable]	[Not Applicable]	[Not Applicable]	NO	[Not Available]	[Not Available]	[Not Available]	[Not Available]	[Not Available]	[Not Available]	[Not Available]	[Not Available]	[Not Available]	[Not Available]	[Not Available]	[Not Available]	[Not Available]	No	[Not Available]	[Not Available]	[Not Available]	[Not Available]	Alive	[Not Available]	[Not Available]	[Not Available]	[Not Available]
TCGA-50-5946	2007-02-11	Lung Adenocarcinoma	NO	YES	Male	Lung	WHITE	[Not Available]	[Not Available]	No	R-Upper	[Not Available]	2010	[Not Available]	[Not Available]	[Not Available]	[Not Available]	T1	N0	MX	Stage IA	[Not Applicable]	[Not Applicable]	[Not Applicable]	[Not Applicable]	NO	[Not Available]	[Not Available]	[Not Available]	[Not Available]	[Not Available]	[Not Available]	[Not Available]	[Not Available]	[Not Available]	[Not Available]	[Not Available]	[Not Available]	4	No	[Not Available]	2009	[Not Available]	[Not Available]	Alive	[Not Available]	[Not Available]	[Not Available]	[Not Available]
TCGA-50-6590	8/25/11	Lung Adenocarcinoma	NO	YES	Female	Lung	WHITE	NOT HISPANIC OR LATINO	[Not Available]	No	R-Upper	[Not Available]	2005	[Not Available]	[Not Available]	[Not Available]	6th	T2	N0	M0	Stage IB	[Not Applicable]	[Not Applicable]	[Not Applicable]	[Not Applicable]	[Not Available]	[Not Available]	[Not Available]	[Not Available]	[Not Available]	[Not Available]	[Not Available]	[Not Available]	[Not Available]	YES	[Not Available]	[Not Available]	[Not Available]	4	No	[Not Available]	2002	50	[Not Available]	Dead	[Not Available]	[Not Available]	[Not Available]	[Not Available]
TCGA-50-6591	8/25/11	Lung Adenocarcinoma	NO	YES	Female	Lung	WHITE	NOT HISPANIC OR LATINO	[Not Available]	No	L-Lower	[Not Available]	2007	[Not Available]	[Not Available]	[Not Available]	6th	T2	N0	M1	Stage IV	[Not Applicable]	[Not Applicable]	[Not Applicable]	[Not Applicable]	[Not Available]	[Not Available]	[Not Available]	[Not Available]	[Not Available]	[Not Available]	[Not Available]	[Not Available]	[Not Available]	[Not Available]	[Not Available]	[Not Available]	[Not Available]	1	No	[Not Available]	[Not Available]	[Not Available]	[Not Available]	Dead	[Not Available]	[Not Available]	[Not Available]	[Not Available]
TCGA-50-6592	8/25/11	Lung Adenocarcinoma	NO	YES	Female	Lung	WHITE	NOT HISPANIC OR LATINO	[Not Available]	No	L-Lower	[Not Available]	2007	[Not Available]	[Not Available]	[Not Available]	6th	T2	N0	M0	Stage IB	[Not Applicable]	[Not Applicable]	[Not Applicable]	[Not Applicable]	[Not Available]	[Not Available]	[Not Available]	[Not Available]	[Not Available]	[Not Available]	[Not Available]	[Not Available]	[Not Available]	[Not Available]	[Not Available]	[Not Available]	[Not Available]	4	No	[Not Available]	[Not Available]	[Not Available]	[Not Available]	Dead	[Not Available]	[Not Available]	[Not Available]	[Not Available]
TCGA-50-6593	8/25/11	Lung Adenocarcinoma	NO	YES	Female	Lung	WHITE	NOT HISPANIC OR LATINO	[Not Available]	No	R-Upper	[Not Available]	2008	[Not Available]	[Not Available]	R0	6th	T1	N2	M0	Stage IIIA	[Not Applicable]	[Not Applicable]	[Not Applicable]	[Not Applicable]	NO	[Not Available]	[Not Available]	[Not Available]	[Not Available]	[Not Available]	YES	NO	[Not Available]	YES	[Not Available]	YES	[Not Available]	4	No	[Not Available]	[Not Available]	[Not Available]	[Not Available]	Dead	[Not Available]	[Not Available]	[Not Available]	[Not Available]
TCGA-50-6594	8/25/11	Lung Adenocarcinoma	NO	YES	Female	Lung	BLACK OR AFRICAN AMERICAN	NOT HISPANIC OR LATINO	[Not Available]	No	L-Upper	[Not Available]	2009	[Not Available]	[Not Available]	[Not Available]	6th	T3	N2	M0	Stage IIIA	[Not Applicable]	[Not Applicable]	[Not Applicable]	[Not Applicable]	[Not Available]	[Not Available]	[Not Available]	[Not Available]	[Not Available]	[Not Available]	[Not Available]	NO	[Not Available]	[Not Available]	[Not Available]	YES	[Not Available]	4	No	[Not Available]	1998	[Not Available]	[Not Available]	Dead	[Not Available]	[Not Available]	[Not Available]	[Not Available]
TCGA-50-6595	8/25/11	Lung Adenocarcinoma	NO	YES	Female	Lung	WHITE	NOT HISPANIC OR LATINO	[Not Available]	No	R-Upper	[Not Available]	2009	[Not Available]	[Not Available]	[Not Available]	6th	T2	N2	M0	Stage IIIA	[Not Applicable]	[Not Applicable]	[Not Applicable]	[Not Applicable]	NO	[Not Available]	[Not Available]	[Not Available]	[Not Available]	[Not Available]	YES	[Not Available]	[Not Available]	YES	[Not Available]	YES	[Not Available]	3	No	[Not Available]	1979	[Not Available]	[Not Available]	Dead	[Not Available]	[Not Available]	[Not Available]	[Not Available]
TCGA-50-6597	8/26/11	Lung Adenocarcinoma	NO	YES	Female	Lung	WHITE	NOT HISPANIC OR LATINO	[Not Available]	No	R-Lower	[Not Available]	2007	[Not Available]	[Not Available]	R0	6th	T2	N0	M0	Stage IB	[Not Applicable]	[Not Applicable]	[Not Applicable]	[Not Applicable]	NO	[Not Available]	[Not Available]	[Not Available]	[Not Available]	[Not Available]	YES	NO	[Not Available]	YES	[Not Available]	[Not Available]	[Not Available]	1	No	[Not Available]	[Not Available]	[Not Available]	[Not Available]	Dead	[Not Available]	[Not Available]	[Not Available]	[Not Available]
TCGA-50-6673	2001-09-12	Lung Adenocarcinoma	NO	YES	Female	Lung	WHITE	[Not Available]	[Not Available]	No	R-Upper	[Not Available]	2004	[Not Available]	[Not Available]	R0	6th	T1	N0	M0	Stage I	[Not Applicable]	[Not Applicable]	[Not Applicable]	[Not Applicable]	[Not Available]	[Not Available]	[Not Available]	[Not Available]	[Not Available]	[Not Available]	[Not Available]	[Not Available]	[Not Available]	[Not Available]	[Not Available]	[Not Available]	[Not Available]	1	No	[Not Available]	[Not Available]	[Not Available]	[Not Available]	Dead	[Not Available]	[Not Available]	[Not Available]	[Not Available]
TCGA-50-7109	2001-09-12	Lung Adenocarcinoma	NO	YES	Male	Lung	WHITE	NOT HISPANIC OR LATINO	[Not Available]	No	R-Lower	[Not Available]	2011	[Not Available]	[Not Available]	[Not Available]	7th	T1	N0	M0	Stage IA	[Not Applicable]	[Not Applicable]	[Not Applicable]	[Not Applicable]	NO	[Not Available]	[Not Available]	[Not Available]	[Not Available]	[Not Available]	[Not Available]	[Not Available]	[Not Available]	[Not Available]	[Not Available]	[Not Available]	[Not Available]	2	No	[Not Available]	[Not Available]	120	[Not Available]	Dead	[Not Available]	[Not Available]	[Not Available]	[Not Available]
TCGA-50-8457	10/16/12	Lung Adenocarcinoma	YES	NO	Female	Lung	BLACK OR AFRICAN AMERICAN	NOT HISPANIC OR LATINO	[Not Available]	No	R-Upper	[Not Available]	2011	[Not Available]	[Not Available]	[Not Available]	7th	T1a	N0	M0	Stage IA	[Not Applicable]	[Not Applicable]	[Not Applicable]	[Not Applicable]	NO	[Not Available]	[Not Available]	[Not Available]	[Not Available]	[Not Available]	YES	YES	G12A	YES	[Not Available]	YES	FISH	4	No	[Not Available]	1997	30	[Not Available]	Alive	[Not Available]	[Not Available]	NO	[Not Available]
TCGA-50-8459	10/16/12	Lung Adenocarcinoma	YES	NO	Male	Lung	WHITE	NOT HISPANIC OR LATINO	[Not Available]	No	R-Lower	[Not Available]	2012	[Not Available]	[Not Available]	[Not Available]	7th	T3	N0	M0	Stage IIB	[Not Applicable]	[Not Applicable]	[Not Applicable]	[Not Applicable]	YES	72	[Not Available]	70	[Not Available]	70	YES	YES	G12C	YES	[Not Available]	[Not Available]	[Not Available]	2	No	[Not Available]	[Not Available]	10	[Not Available]	Alive	[Not Available]	[Not Available]	NO	[Not Available]
TCGA-50-8460	10/18/12	Lung Adenocarcinoma	YES	NO	Male	Lung	WHITE	NOT HISPANIC OR LATINO	[Not Available]	No	R-Upper	[Not Available]	2012	[Not Available]	[Not Available]	R0	7th	T1a	N0	M0	Stage IA	[Not Applicable]	[Not Applicable]	[Not Applicable]	[Not Applicable]	NO	[Not Available]	[Not Available]	[Not Available]	[Not Available]	[Not Available]	YES	NO	[Not Available]	YES	[Not Available]	[Not Available]	[Not Available]	[Not Available]	No	[Not Available]	[Not Available]	[Not Available]	[Not Available]	Alive	[Not Available]	[Not Available]	YES	[Not Available]
TCGA-53-7624	12/13/11	Lung Adenocarcinoma	NO	YES	Female	Lung	WHITE	HISPANIC OR LATINO	[Not Available]	No	R-Upper	Peripheral Lung	2008	[Not Available]	[Not Available]	R0	6th	T2	N0	M1	Stage IV	[Not Applicable]	[Not Applicable]	[Not Applicable]	[Not Applicable]	[Not Available]	[Not Available]	[Not Available]	[Not Available]	[Not Available]	[Not Available]	NO	[Not Available]	[Not Available]	NO	[Not Available]	NO	[Not Available]	2	No	1986	[Not Available]	50	[Not Available]	Dead	0	Post-Adjuvant Therapy	[Not Available]	[Not Available]
TCGA-53-7626	12/13/11	Lung Adenocarcinoma	NO	YES	Female	Lung	WHITE	NOT HISPANIC OR LATINO	[Not Available]	No	R-Upper	Peripheral Lung	2008	[Not Available]	[Not Available]	R0	6th	T1	N1	M0	Stage IIA	[Not Applicable]	[Not Applicable]	[Not Applicable]	[Not Applicable]	[Not Available]	[Not Available]	[Not Available]	[Not Available]	[Not Available]	[Not Available]	NO	[Not Available]	[Not Available]	NO	[Not Available]	NO	[Not Available]	4	No	1971	2006	35	[Not Available]	Dead	0	Post-Adjuvant Therapy	[Not Available]	[Not Available]
TCGA-53-7813	3/14/12	Lung Adenocarcinoma	NO	YES	Female	Lung	WHITE	NOT HISPANIC OR LATINO	[Not Available]	No	R-Upper	[Not Available]	2008	[Not Available]	[Not Available]	[Not Available]	6th	T4	N0	M0	Stage IIIB	[Not Applicable]	[Not Applicable]	[Not Applicable]	[Not Applicable]	YES	90	91	67	69	88	NO	[Not Available]	[Not Available]	NO	[Not Available]	NO	[Not Available]	4	No	1973	2008	35	[Not Available]	Alive	1	Pre-Adjuvant Therapy	[Not Available]	[Not Available]
TCGA-53-A4EZ	2003-07-13	Lung Adenocarcinoma	YES	NO	Male	Lung	WHITE	HISPANIC OR LATINO	[Not Available]	No	L-Upper	Peripheral Lung	2012	[Not Available]	[Not Available]	RX	7th	T2a	N1	MX	Stage IIA	[Not Applicable]	[Not Applicable]	[Not Applicable]	[Not Applicable]	YES	76	75	73	73	86	YES	NO	[Not Available]	YES	[Not Available]	YES	FISH	3	No	1956	1996	40	100	Alive	0	Preoperative	NO	[Not Available]
TCGA-55-1592	3/15/11	Lung Adenocarcinoma	NO	YES	Male	Lung	WHITE	NOT HISPANIC OR LATINO	[Not Available]	Yes	L-Upper	[Not Available]	2005	[Not Available]	[Not Available]	R0	[Not Available]	T2	N0	M0	Stage IA	[Not Applicable]	[Not Applicable]	[Not Applicable]	[Not Applicable]	[Not Available]	[Not Available]	[Not Available]	[Not Available]	[Not Available]	[Not Available]	[Not Available]	[Not Available]	[Not Available]	[Not Available]	[Not Available]	[Not Available]	[Not Available]	4	No	1957	1997	[Not Available]	[Not Available]	Dead	[Not Available]	[Not Available]	[Not Available]	[Not Available]
TCGA-55-1594	9/14/10	Lung Adenocarcinoma	NO	YES	Male	Lung	WHITE	NOT HISPANIC OR LATINO	[Not Available]	No	R-Lower	[Not Available]	2005	[Not Available]	[Not Available]	R0	[Not Available]	T2	N2	M0	Stage IIIA	[Not Applicable]	[Not Applicable]	[Not Applicable]	[Not Applicable]	[Not Available]	[Not Available]	[Not Available]	[Not Available]	[Not Available]	[Not Available]	[Not Available]	[Not Available]	[Not Available]	[Not Available]	[Not Available]	[Not Available]	[Not Available]	2	No	1965	[Not Available]	[Not Available]	[Not Available]	Alive	[Not Available]	[Not Available]	[Not Available]	[Not Available]
TCGA-55-1595	3/14/11	Lung Adenocarcinoma	[Not Available]	[Not Available]	Female	Lung	ASIAN	NOT HISPANIC OR LATINO	[Not Available]	Yes	L-Lower	[Not Available]	2004	[Not Available]	[Not Available]	[Not Available]	6th	T1	N0	M0	Stage IA	[Not Applicable]	[Not Applicable]	[Not Applicable]	[Not Applicable]	[Not Available]	[Not Available]	[Not Available]	[Not Available]	[Not Available]	[Not Available]	[Not Available]	[Not Available]	[Not Available]	[Not Available]	[Not Available]	[Not Available]	[Not Available]	4	No	1964	1993	[Not Available]	[Not Available]	Alive	[Not Available]	[Not Available]	[Not Available]	[Not Available]
TCGA-55-1596	9/13/10	Lung Adenocarcinoma	NO	YES	Male	Lung	ASIAN	NOT HISPANIC OR LATINO	[Not Available]	No	R-Upper	[Not Available]	2004	[Not Available]	[Not Available]	R0	6th	T2	N1	M0	Stage IIB	[Not Applicable]	[Not Applicable]	[Not Applicable]	[Not Applicable]	[Not Available]	[Not Available]	[Not Available]	[Not Available]	[Not Available]	[Not Available]	[Not Available]	[Not Available]	[Not Available]	[Not Available]	[Not Available]	[Not Available]	[Not Available]	2	No	1979	[Not Available]	50	[Not Available]	Alive	[Not Available]	[Not Available]	[Not Available]	[Not Available]
TCGA-55-5899	9/20/10	Lung Adenocarcinoma	NO	YES	Male	Lung	WHITE	NOT HISPANIC OR LATINO	[Not Available]	No	R-Upper	[Not Available]	2010	[Not Available]	[Not Available]	R0	7th	T1a	N1	M0	[Discrepancy]	[Not Applicable]	[Not Applicable]	[Not Applicable]	[Not Applicable]	[Not Available]	[Not Available]	[Not Available]	[Not Available]	[Not Available]	[Not Available]	[Not Available]	[Not Available]	[Not Available]	[Not Available]	[Not Available]	[Not Available]	[Not Available]	2	No	1985	[Not Available]	[Not Available]	[Not Available]	Alive	[Not Available]	[Not Available]	[Not Available]	[Not Available]
TCGA-55-6543	2012-03-10	Lung Adenocarcinoma	NO	YES	Female	Lung	WHITE	[Not Available]	[Not Available]	No	R-Upper	Peripheral Lung	2010	[Not Available]	[Not Available]	[Not Available]	7th	T1b	N0	MX	Stage IA	[Not Applicable]	[Not Applicable]	[Not Applicable]	[Not Applicable]	[Not Available]	[Not Available]	[Not Available]	[Not Available]	[Not Available]	[Not Available]	[Not Available]	[Not Available]	[Not Available]	[Not Available]	[Not Available]	[Not Available]	[Not Available]	4	No	[Not Available]	2004	60	[Not Available]	Alive	[Not Available]	[Not Available]	[Not Available]	[Not Available]
TCGA-55-6642	7/19/11	Lung Adenocarcinoma	NO	YES	Male	Lung	WHITE	[Not Available]	[Not Available]	No	R-Lower	[Not Available]	2006	[Not Available]	[Not Available]	R0	6th	T2	N0	MX	Stage IB	[Not Applicable]	[Not Applicable]	[Not Applicable]	[Not Applicable]	[Not Available]	[Not Available]	[Not Available]	[Not Available]	[Not Available]	[Not Available]	[Not Available]	[Not Available]	[Not Available]	[Not Available]	[Not Available]	[Not Available]	[Not Available]	2	No	1961	[Not Available]	[Not Available]	[Not Available]	Alive	[Not Available]	[Not Available]	[Not Available]	[Not Available]
TCGA-55-6712	7/19/11	Lung Adenocarcinoma	NO	YES	Male	Lung	WHITE	[Not Available]	[Not Available]	No	L-Upper	[Not Available]	2010	[Not Available]	[Not Available]	R1	7th	T2a	N1	MX	Stage IIA	[Not Applicable]	[Not Applicable]	[Not Applicable]	[Not Applicable]	[Not Available]	[Not Available]	[Not Available]	[Not Available]	[Not Available]	[Not Available]	[Not Available]	[Not Available]	[Not Available]	[Not Available]	[Not Available]	[Not Available]	[Not Available]	4	No	1970	2003	[Not Available]	[Not Available]	Dead	[Not Available]	[Not Available]	[Not Available]	[Not Available]
TCGA-55-6968	7/28/11	Lung Adenocarcinoma	NO	YES	Male	Lung	WHITE	NOT HISPANIC OR LATINO	[Not Available]	No	R-Lower	[Not Available]	2004	[Not Available]	[Not Available]	[Not Available]	6th	T1	N0	M1	Stage IV	[Not Applicable]	[Not Applicable]	[Not Applicable]	[Not Applicable]	[Not Available]	[Not Available]	[Not Available]	[Not Available]	[Not Available]	[Not Available]	[Not Available]	[Not Available]	[Not Available]	[Not Available]	[Not Available]	[Not Available]	[Not Available]	2	No	[Not Available]	[Not Available]	[Not Available]	[Not Available]	Dead	[Not Available]	[Not Available]	[Not Available]	[Not Available]
TCGA-55-6969	7/25/11	Lung Adenocarcinoma	NO	YES	Male	Lung	WHITE	[Not Available]	[Not Available]	No	L-Upper	[Not Available]	2004	[Not Available]	[Not Available]	[Not Available]	6th	T2	N0	M0	Stage IB	[Not Applicable]	[Not Applicable]	[Not Applicable]	[Not Applicable]	[Not Available]	[Not Available]	[Not Available]	[Not Available]	[Not Available]	[Not Available]	NO	[Not Available]	[Not Available]	NO	[Not Available]	NO	[Not Available]	4	No	[Not Available]	2004	[Not Available]	[Not Available]	Alive	[Not Available]	[Not Available]	[Not Available]	[Not Available]
TCGA-55-6970	7/26/11	Lung Adenocarcinoma	NO	YES	Female	Lung	WHITE	[Not Available]	[Not Available]	No	R-Upper	[Not Available]	2004	[Not Available]	[Not Available]	R1	6th	T2	N2	MX	Stage IIIA	[Not Applicable]	[Not Applicable]	[Not Applicable]	[Not Applicable]	[Not Available]	[Not Available]	[Not Available]	[Not Available]	[Not Available]	[Not Available]	NO	[Not Available]	[Not Available]	NO	[Not Available]	NO	[Not Available]	4	No	[Not Available]	[Not Available]	[Not Available]	[Not Available]	Dead	[Not Available]	[Not Available]	[Not Available]	[Not Available]
TCGA-55-6971	7/28/11	Lung Adenocarcinoma	NO	YES	Female	Lung	WHITE	[Not Available]	[Not Available]	No	L-Lower	[Not Available]	2010	[Not Available]	[Not Available]	R0	7th	T2	N0	MX	Stage IB	[Not Applicable]	[Not Applicable]	[Not Applicable]	[Not Applicable]	[Not Available]	[Not Available]	[Not Available]	[Not Available]	[Not Available]	[Not Available]	NO	[Not Available]	[Not Available]	NO	[Not Available]	NO	[Not Available]	4	No	1970	2010	60	[Not Available]	Alive	[Not Available]	[Not Available]	[Not Available]	[Not Available]
TCGA-55-6972	7/27/11	Lung Adenocarcinoma	NO	YES	Male	Lung	WHITE	NOT HISPANIC OR LATINO	[Not Available]	No	R-Upper	[Not Available]	2005	[Not Available]	[Not Available]	R0	6th	T2	N0	M0	Stage IB	[Not Applicable]	[Not Applicable]	[Not Applicable]	[Not Applicable]	[Not Available]	[Not Available]	[Not Available]	[Not Available]	[Not Available]	[Not Available]	NO	[Not Available]	[Not Available]	NO	[Not Available]	NO	[Not Available]	2	No	[Not Available]	[Not Available]	[Not Available]	[Not Available]	Dead	[Not Available]	[Not Available]	[Not Available]	[Not Available]
TCGA-55-6975	7/27/11	Lung Adenocarcinoma	NO	YES	Male	Lung	WHITE	NOT HISPANIC OR LATINO	[Not Available]	No	L-Lower	[Not Available]	2004	[Not Available]	[Not Available]	[Not Available]	6th	T2	N1	M0	Stage IIB	[Not Applicable]	[Not Applicable]	[Not Applicable]	[Not Applicable]	[Not Available]	[Not Available]	[Not Available]	[Not Available]	[Not Available]	[Not Available]	NO	[Not Available]	[Not Available]	NO	[Not Available]	NO	[Not Available]	4	No	[Not Available]	2004	[Not Available]	[Not Available]	Dead	[Not Available]	[Not Available]	[Not Available]	[Not Available]
TCGA-55-6978	7/27/11	Lung Adenocarcinoma	NO	YES	Male	Lung	WHITE	NOT HISPANIC OR LATINO	[Not Available]	Yes	R-Middle	[Not Available]	2010	[Not Available]	[Not Available]	[Not Available]	7th	T2b	N0	MX	Stage IIA	[Not Applicable]	[Not Applicable]	[Not Applicable]	[Not Applicable]	[Not Available]	[Not Available]	[Not Available]	[Not Available]	[Not Available]	[Not Available]	NO	[Not Available]	[Not Available]	NO	[Not Available]	NO	[Not Available]	1	No	[Not Available]	[Not Available]	[Not Available]	[Not Available]	Dead	[Not Available]	[Not Available]	[Not Available]	[Not Available]
TCGA-55-6979	7/26/11	Lung Adenocarcinoma	NO	YES	Female	Lung	WHITE	[Not Available]	[Not Available]	Yes	L-Upper	[Not Available]	2006	[Not Available]	[Not Available]	[Not Available]	6th	T2	N1	M0	Stage IIB	[Not Applicable]	[Not Applicable]	[Not Applicable]	[Not Applicable]	[Not Available]	[Not Available]	[Not Available]	[Not Available]	[Not Available]	[Not Available]	NO	[Not Available]	[Not Available]	NO	[Not Available]	NO	[Not Available]	3	No	[Not Available]	[Not Available]	[Not Available]	[Not Available]	Dead	[Not Available]	[Not Available]	[Not Available]	[Not Available]
TCGA-55-6980	7/27/11	Lung Adenocarcinoma	NO	YES	Male	Lung	WHITE	[Not Available]	[Not Available]	No	R-Lower	[Not Available]	2006	[Not Available]	[Not Available]	R0	6th	T1	N0	M0	Stage IA	[Not Applicable]	[Not Applicable]	[Not Applicable]	[Not Applicable]	[Not Available]	[Not Available]	[Not Available]	[Not Available]	[Not Available]	[Not Available]	NO	[Not Available]	[Not Available]	NO	[Not Available]	NO	[Not Available]	1	No	[Not Available]	[Not Available]	[Not Available]	[Not Available]	Alive	[Not Available]	[Not Available]	[Not Available]	[Not Available]
TCGA-55-6981	7/27/11	Lung Adenocarcinoma	NO	YES	Female	Lung	WHITE	NOT HISPANIC OR LATINO	[Not Available]	No	L-Upper	[Not Available]	2005	[Not Available]	[Not Available]	R0	6th	T1	N2	M0	Stage IIIA	[Not Applicable]	[Not Applicable]	[Not Applicable]	[Not Applicable]	[Not Available]	[Not Available]	[Not Available]	[Not Available]	[Not Available]	[Not Available]	NO	[Not Available]	[Not Available]	NO	[Not Available]	NO	[Not Available]	3	No	[Not Available]	[Not Available]	[Not Available]	[Not Available]	Dead	[Not Available]	[Not Available]	[Not Available]	[Not Available]
TCGA-55-6982	7/26/11	Lung Adenocarcinoma	NO	YES	Female	Lung	WHITE	[Not Available]	[Not Available]	No	R-Lower	[Not Available]	2004	[Not Available]	[Not Available]	[Not Available]	6th	T2	N1	M0	Stage IIB	[Not Applicable]	[Not Applicable]	[Not Applicable]	[Not Applicable]	[Not Available]	[Not Available]	[Not Available]	[Not Available]	[Not Available]	[Not Available]	NO	[Not Available]	[Not Available]	NO	[Not Available]	NO	[Not Available]	1	No	[Not Available]	[Not Available]	[Not Available]	[Not Available]	Dead	[Not Available]	[Not Available]	[Not Available]	[Not Available]
TCGA-55-6983	7/27/11	Lung Adenocarcinoma	NO	YES	Male	Lung	WHITE	NOT HISPANIC OR LATINO	[Not Available]	No	L-Lower	[Not Available]	2005	[Not Available]	[Not Available]	R0	6th	T2	N1	M0	Stage IIB	[Not Applicable]	[Not Applicable]	[Not Applicable]	[Not Applicable]	[Not Available]	[Not Available]	[Not Available]	[Not Available]	[Not Available]	[Not Available]	NO	[Not Available]	[Not Available]	NO	[Not Available]	NO	[Not Available]	4	No	[Not Available]	[Not Available]	60	[Not Available]	Alive	[Not Available]	[Not Available]	[Not Available]	[Not Available]
TCGA-55-6984	7/27/11	Lung Adenocarcinoma	NO	YES	Female	Lung	WHITE	NOT HISPANIC OR LATINO	[Not Available]	No	L-Lower	[Not Available]	2006	[Not Available]	[Not Available]	[Not Available]	6th	T2	N1	M0	Stage IIB	[Not Applicable]	[Not Applicable]	[Not Applicable]	[Not Applicable]	[Not Available]	[Not Available]	[Not Available]	[Not Available]	[Not Available]	[Not Available]	NO	[Not Available]	[Not Available]	NO	[Not Available]	NO	[Not Available]	[Not Available]	No	[Not Available]	[Not Available]	[Not Available]	[Not Available]	Dead	[Not Available]	[Not Available]	[Not Available]	[Not Available]
TCGA-55-6985	7/26/11	Lung Adenocarcinoma	NO	YES	Female	Lung	WHITE	[Not Available]	[Not Available]	No	L-Upper	[Not Available]	2004	[Not Available]	[Not Available]	R0	6th	T2	N0	MX	Stage IB	[Not Applicable]	[Not Applicable]	[Not Applicable]	[Not Applicable]	[Not Available]	[Not Available]	[Not Available]	[Not Available]	[Not Available]	[Not Available]	NO	[Not Available]	[Not Available]	NO	[Not Available]	NO	[Not Available]	4	No	[Not Available]	2004	50	[Not Available]	Alive	[Not Available]	[Not Available]	[Not Available]	[Not Available]
TCGA-55-6986	7/26/11	Lung Adenocarcinoma	NO	YES	Female	Lung	WHITE	[Not Available]	[Not Available]	No	R-Lower	[Not Available]	2004	[Not Available]	[Not Available]	[Not Available]	6th	T2	N0	M0	Stage IB	[Not Applicable]	[Not Applicable]	[Not Applicable]	[Not Applicable]	[Not Available]	[Not Available]	[Not Available]	[Not Available]	[Not Available]	[Not Available]	NO	[Not Available]	[Not Available]	NO	[Not Available]	NO	[Not Available]	1	No	[Not Available]	[Not Available]	[Not Available]	[Not Available]	Alive	[Not Available]	[Not Available]	[Not Available]	[Not Available]
TCGA-55-6987	7/27/11	Lung Adenocarcinoma	NO	YES	Male	Lung	WHITE	NOT HISPANIC OR LATINO	[Not Available]	No	L-Lower	[Not Available]	2006	[Not Available]	[Not Available]	[Not Available]	6th	T1	N0	M0	Stage IA	[Not Applicable]	[Not Applicable]	[Not Applicable]	[Not Applicable]	[Not Available]	[Not Available]	[Not Available]	[Not Available]	[Not Available]	[Not Available]	NO	[Not Available]	[Not Available]	NO	[Not Available]	NO	[Not Available]	4	No	[Not Available]	2006	[Not Available]	[Not Available]	Alive	[Not Available]	[Not Available]	[Not Available]	[Not Available]
TCGA-55-7227	2010-06-11	Lung Adenocarcinoma	YES	NO	Male	Lung	WHITE	NOT HISPANIC OR LATINO	[Not Available]	No	R-Lower	[Not Available]	2011	[Not Available]	[Not Available]	R0	7th	T3	N1	MX	Stage IIIA	[Not Applicable]	[Not Applicable]	[Not Applicable]	[Not Applicable]	[Not Available]	[Not Available]	[Not Available]	[Not Available]	[Not Available]	[Not Available]	[Not Available]	[Not Available]	[Not Available]	[Not Available]	[Not Available]	[Not Available]	[Not Available]	3	No	1953	1993	[Not Available]	[Not Available]	Dead	[Not Available]	[Not Available]	[Not Available]	[Not Available]
TCGA-55-7281	2010-06-11	Lung Adenocarcinoma	YES	NO	Female	Lung	WHITE	[Not Available]	[Not Available]	No	R-Middle	[Not Available]	2011	[Not Available]	[Not Available]	R0	7th	T1b	N0	M0	Stage IA	[Not Applicable]	[Not Applicable]	[Not Applicable]	[Not Applicable]	[Not Available]	[Not Available]	[Not Available]	[Not Available]	[Not Available]	[Not Available]	NO	[Not Available]	[Not Available]	[Not Available]	[Not Available]	[Not Available]	[Not Available]	4	No	[Not Available]	[Not Available]	20	[Not Available]	Alive	[Not Available]	[Not Available]	[Not Available]	[Not Available]
TCGA-55-7283	2010-06-11	Lung Adenocarcinoma	YES	NO	Female	Lung	WHITE	NOT HISPANIC OR LATINO	[Not Available]	No	R-Upper	Central Lung	2011	[Not Available]	[Not Available]	[Not Available]	7th	T3	N2	MX	Stage IIIA	[Not Applicable]	[Not Applicable]	[Not Applicable]	[Not Applicable]	YES	82	[Not Available]	105	[Not Available]	64	NO	[Not Available]	[Not Available]	NO	[Not Available]	NO	[Not Available]	3	No	1950	1961	5	100	Alive	0	Preoperative	[Not Available]	[Not Available]
TCGA-55-7284	6/13/12	Lung Adenocarcinoma	YES	NO	Male	Lung	WHITE	NOT HISPANIC OR LATINO	[Not Available]	Yes, History of Synchronous/Bilateral Malignancy	R-Lower	[Not Available]	2011	[Not Available]	[Not Available]	R0	7th	T3	N0	MX	Stage IIB	[Not Applicable]	[Not Applicable]	[Not Applicable]	[Not Applicable]	YES	74	70	108	102	89	[Not Available]	[Not Available]	[Not Available]	[Not Available]	[Not Available]	[Not Available]	[Not Available]	3	No	[Not Available]	[Not Available]	[Not Available]	[Not Available]	Dead	[Not Available]	[Not Available]	[Not Available]	[Not Available]
TCGA-55-7570	2001-11-12	Lung Adenocarcinoma	YES	NO	Male	Lung	BLACK OR AFRICAN AMERICAN	NOT HISPANIC OR LATINO	[Not Available]	No	R-Upper	[Not Available]	2011	[Not Available]	[Not Available]	R0	7th	T1a	N0	MX	Stage IA	[Not Applicable]	[Not Applicable]	[Not Applicable]	[Not Applicable]	[Not Available]	[Not Available]	[Not Available]	[Not Available]	[Not Available]	[Not Available]	[Not Available]	[Not Available]	[Not Available]	[Not Available]	[Not Available]	[Not Available]	[Not Available]	2	No	1971	[Not Available]	[Not Available]	[Not Available]	Alive	[Not Available]	[Not Available]	[Not Available]	[Not Available]
TCGA-55-7573	2001-11-12	Lung Adenocarcinoma	YES	NO	Female	Lung	WHITE	NOT HISPANIC OR LATINO	[Not Available]	Yes	R-Upper	Central Lung	2011	[Not Available]	[Not Available]	[Not Available]	7th	T1b	N0	MX	Stage IA	[Not Applicable]	[Not Applicable]	[Not Applicable]	[Not Applicable]	YES	130	134	115	119	51	NO	[Not Available]	[Not Available]	NO	[Not Available]	NO	[Not Available]	3	No	[Not Available]	1983	[Not Available]	90	Alive	1	Preoperative	[Not Available]	[Not Available]
TCGA-55-7574	2001-11-12	Lung Adenocarcinoma	YES	NO	Female	Lung	WHITE	NOT HISPANIC OR LATINO	[Not Available]	No	R-Upper	[Not Available]	2011	[Not Available]	[Not Available]	R1	7th	T2a	N0	M0	Stage IB	[Not Applicable]	[Not Applicable]	[Not Applicable]	[Not Applicable]	[Not Available]	[Not Available]	[Not Available]	[Not Available]	[Not Available]	[Not Available]	NO	[Not Available]	[Not Available]	[Not Available]	[Not Available]	[Not Available]	[Not Available]	4	No	1971	2011	2	[Not Available]	Dead	[Not Available]	[Not Available]	[Not Available]	[Not Available]
TCGA-55-7576	2001-11-12	Lung Adenocarcinoma	YES	NO	Male	Lung	BLACK OR AFRICAN AMERICAN	NOT HISPANIC OR LATINO	[Not Available]	No	R-Upper	[Not Available]	2011	[Not Available]	[Not Available]	R0	7th	T2a	N0	M0	Stage IB	[Not Applicable]	[Not Applicable]	[Not Applicable]	[Not Applicable]	[Not Available]	[Not Available]	[Not Available]	[Not Available]	[Not Available]	[Not Available]	[Not Available]	[Not Available]	[Not Available]	[Not Available]	[Not Available]	[Not Available]	[Not Available]	2	No	1972	[Not Available]	[Not Available]	[Not Available]	Alive	[Not Available]	[Not Available]	[Not Available]	[Not Available]
TCGA-55-7724	2003-08-12	Lung Adenocarcinoma	YES	NO	Female	Lung	WHITE	NOT HISPANIC OR LATINO	[Not Available]	Yes	L-Upper	[Not Available]	2011	[Not Available]	[Not Available]	R0	7th	T2a	N0	MX	Stage IB	[Not Applicable]	[Not Applicable]	[Not Applicable]	[Not Applicable]	YES	33	[Not Available]	36	[Not Available]	49	[Not Available]	[Not Available]	[Not Available]	[Not Available]	[Not Available]	[Not Available]	[Not Available]	4	No	1958	2008	50	[Not Available]	Alive	[Not Available]	[Not Available]	[Not Available]	[Not Available]
TCGA-55-7725	2003-08-12	Lung Adenocarcinoma	YES	NO	Female	Lung	WHITE	NOT HISPANIC OR LATINO	[Not Available]	Yes	R-Lower	Central Lung	2011	[Not Available]	[Not Available]	R0	7th	T1a	N0	MX	Stage IA	[Not Applicable]	[Not Applicable]	[Not Applicable]	[Not Applicable]	YES	61	64	89	88	[Not Available]	NO	[Not Available]	[Not Available]	NO	[Not Available]	NO	[Not Available]	3	No	1963	1994	16	90	Alive	1	Preoperative	[Not Available]	[Not Available]
TCGA-55-7726	2003-08-12	Lung Adenocarcinoma	YES	NO	Female	Lung	WHITE	NOT HISPANIC OR LATINO	[Not Available]	Yes	L-Lower	[Not Available]	2011	[Not Available]	[Not Available]	R0	7th	T1b	N0	MX	Stage IA	[Not Applicable]	[Not Applicable]	[Not Applicable]	[Not Applicable]	YES	49	61	55	59	72	[Not Available]	[Not Available]	[Not Available]	[Not Available]	[Not Available]	[Not Available]	[Not Available]	3	No	1955	1979	30	[Not Available]	Alive	[Not Available]	[Not Available]	[Not Available]	[Not Available]
TCGA-55-7727	2003-08-12	Lung Adenocarcinoma	YES	NO	Male	Lung	WHITE	NOT HISPANIC OR LATINO	[Not Available]	No	L-Upper	[Not Available]	2011	[Not Available]	[Not Available]	R0	7th	T1a	N2	MX	Stage IIIA	[Not Applicable]	[Not Applicable]	[Not Applicable]	[Not Applicable]	YES	74	73	49	48	86	[Not Available]	[Not Available]	[Not Available]	[Not Available]	[Not Available]	[Not Available]	[Not Available]	2	No	[Not Available]	[Not Available]	[Not Available]	[Not Available]	Alive	[Not Available]	[Not Available]	[Not Available]	[Not Available]
TCGA-55-7728	2003-08-12	Lung Adenocarcinoma	YES	NO	Female	Lung	WHITE	NOT HISPANIC OR LATINO	[Not Available]	No	L-Upper	[Not Available]	2011	[Not Available]	[Not Available]	R0	7th	T2a	N0	MX	Stage IB	[Not Applicable]	[Not Applicable]	[Not Applicable]	[Not Applicable]	YES	67	74	[Not Available]	[Not Available]	64	NO	[Not Available]	[Not Available]	NO	[Not Available]	NO	[Not Available]	4	No	1980	1996	30	[Not Available]	Alive	[Not Available]	[Not Available]	[Not Available]	[Not Available]
TCGA-55-7815	2003-09-12	Lung Adenocarcinoma	YES	NO	Male	Lung	[Not Available]	[Not Available]	[Not Available]	No	R-Lower	[Not Available]	2011	[Not Available]	[Not Available]	R0	7th	T2a	N0	MX	Stage IB	[Not Applicable]	[Not Applicable]	[Not Applicable]	[Not Applicable]	YES	72	76	[Not Available]	[Not Available]	59	[Not Available]	[Not Available]	[Not Available]	[Not Available]	[Not Available]	[Not Available]	[Not Available]	1	No	[Not Available]	[Not Available]	[Not Available]	[Not Available]	Alive	[Not Available]	[Not Available]	[Not Available]	[Not Available]
TCGA-55-7816	2003-09-12	Lung Adenocarcinoma	YES	NO	Female	Lung	WHITE	NOT HISPANIC OR LATINO	[Not Available]	No	R-Upper	[Not Available]	2011	[Not Available]	[Not Available]	[Not Available]	7th	TX	NX	MX	Stage IV	[Not Applicable]	[Not Applicable]	[Not Applicable]	[Not Applicable]	NO	[Not Available]	[Not Available]	[Not Available]	[Not Available]	[Not Available]	[Not Available]	[Not Available]	[Not Available]	[Not Available]	[Not Available]	[Not Available]	[Not Available]	1	No	[Not Available]	[Not Available]	[Not Available]	[Not Available]	Dead	[Not Available]	[Not Available]	[Not Available]	[Not Available]
TCGA-55-7903	2003-10-12	Lung Adenocarcinoma	YES	NO	Male	Lung	WHITE	NOT HISPANIC OR LATINO	[Not Available]	No	R-Lower	[Not Available]	2011	[Not Available]	[Not Available]	R0	7th	T1b	N0	MX	Stage IA	[Not Applicable]	[Not Applicable]	[Not Applicable]	[Not Applicable]	YES	66	[Not Available]	63	[Not Available]	83	NO	[Not Available]	[Not Available]	NO	[Not Available]	NO	[Not Available]	2	No	[Not Available]	[Not Available]	40	[Not Available]	Alive	[Not Available]	[Not Available]	[Not Available]	[Not Available]
TCGA-55-7907	2003-10-12	Lung Adenocarcinoma	YES	NO	Male	Lung	WHITE	NOT HISPANIC OR LATINO	[Not Available]	No	L-Upper	[Not Available]	2011	[Not Available]	[Not Available]	R0	7th	T2a	N1	MX	Stage IIA	[Not Applicable]	[Not Applicable]	[Not Applicable]	[Not Applicable]	YES	76	87	75	80	75	[Not Available]	[Not Available]	[Not Available]	[Not Available]	[Not Available]	[Not Available]	[Not Available]	3	No	1954	1994	80	[Not Available]	Dead	[Not Available]	[Not Available]	[Not Available]	[Not Available]
TCGA-55-7910	2003-10-12	Lung Adenocarcinoma	YES	NO	Female	Lung	BLACK OR AFRICAN AMERICAN	NOT HISPANIC OR LATINO	[Not Available]	No	L-Lower	Peripheral Lung	2011	[Not Available]	[Not Available]	R0	7th	T2b	N0	M0	Stage IIA	[Not Applicable]	[Not Applicable]	[Not Applicable]	[Not Applicable]	YES	86	91	97	91	44	[Not Available]	[Not Available]	[Not Available]	[Not Available]	[Not Available]	[Not Available]	[Not Available]	4	No	1996	2011	15	80	Alive	1	Preoperative	[Not Available]	[Not Available]
TCGA-55-7911	2003-10-12	Lung Adenocarcinoma	YES	NO	Female	Lung	WHITE	NOT HISPANIC OR LATINO	[Not Available]	No	R-Middle	[Not Available]	2011	[Not Available]	[Not Available]	R0	7th	T1a	N0	MX	Stage IA	[Not Applicable]	[Not Applicable]	[Not Applicable]	[Not Applicable]	YES	64	86	[Not Available]	[Not Available]	[Not Available]	NO	[Not Available]	[Not Available]	NO	[Not Available]	NO	[Not Available]	3	No	1959	1981	96	[Not Available]	Alive	[Not Available]	[Not Available]	[Not Available]	[Not Available]
TCGA-55-7913	6/17/12	Lung Adenocarcinoma	YES	NO	Female	Lung	BLACK OR AFRICAN AMERICAN	NOT HISPANIC OR LATINO	[Not Available]	No	L-Lower	Central Lung	2011	[Not Available]	[Not Available]	R0	7th	T1b	N0	MX	Stage IA	[Not Applicable]	[Not Applicable]	[Not Applicable]	[Not Applicable]	[Not Available]	[Not Available]	[Not Available]	[Not Available]	[Not Available]	[Not Available]	YES	NO	[Not Available]	YES	[Not Available]	YES	FISH	2	No	1971	[Not Available]	40	90	Dead	1	Preoperative	[Not Available]	[Not Available]
TCGA-55-7914	2003-10-12	Lung Adenocarcinoma	YES	NO	Female	Lung	WHITE	NOT HISPANIC OR LATINO	[Not Available]	Yes	R-Upper	Central Lung	2011	[Not Available]	[Not Available]	R0	7th	T1b	N1	MX	Stage IIA	[Not Applicable]	[Not Applicable]	[Not Applicable]	[Not Applicable]	YES	73	[Not Available]	88	[Not Available]	56	YES	YES	G12C	YES	[Not Available]	YES	FISH	2	No	1990	[Not Available]	5	80	Dead	1	Preoperative	[Not Available]	[Not Available]
TCGA-55-7994	2005-07-12	Lung Adenocarcinoma	YES	NO	Male	Lung	WHITE	NOT HISPANIC OR LATINO	[Not Available]	No	R-Upper	[Not Available]	2011	[Not Available]	[Not Available]	R0	7th	T3	N0	MX	Stage IIB	[Not Applicable]	[Not Applicable]	[Not Applicable]	[Not Applicable]	[Not Available]	[Not Available]	[Not Available]	[Not Available]	[Not Available]	[Not Available]	NO	[Not Available]	[Not Available]	NO	[Not Available]	NO	[Not Available]	2	No	[Not Available]	[Not Available]	28	[Not Available]	Alive	[Not Available]	[Not Available]	[Not Available]	[Not Available]
TCGA-55-7995	2005-07-12	Lung Adenocarcinoma	YES	NO	Female	Lung	WHITE	NOT HISPANIC OR LATINO	[Not Available]	No	L-Upper	Peripheral Lung	2012	[Not Available]	[Not Available]	R0	7th	T1b	N0	M0	Stage IA	[Not Applicable]	[Not Applicable]	[Not Applicable]	[Not Applicable]	YES	77	[Not Available]	71	[Not Available]	51	[Not Available]	[Not Available]	[Not Available]	NO	[Not Available]	NO	[Not Available]	4	No	[Not Available]	2002	60	[Not Available]	Alive	[Not Available]	[Not Available]	[Not Available]	[Not Available]
TCGA-55-8085	6/15/12	Lung Adenocarcinoma	YES	NO	Male	Lung	WHITE	NOT HISPANIC OR LATINO	[Not Available]	No	L-Lower	[Not Available]	2011	[Not Available]	[Not Available]	R0	7th	T1b	N0	M0	Stage IA	[Not Applicable]	[Not Applicable]	[Not Applicable]	[Not Applicable]	YES	35	45	39	46	51	[Not Available]	[Not Available]	[Not Available]	[Not Available]	[Not Available]	[Not Available]	[Not Available]	2	No	[Not Available]	[Not Available]	[Not Available]	[Not Available]	Alive	1	[Not Available]	[Not Available]	[Not Available]
TCGA-55-8087	6/15/12	Lung Adenocarcinoma	YES	NO	Female	Lung	WHITE	NOT HISPANIC OR LATINO	[Not Available]	No	R-Upper	[Not Available]	2011	[Not Available]	[Not Available]	R0	7th	T2a	N0	MX	Stage IB	[Not Applicable]	[Not Applicable]	[Not Applicable]	[Not Applicable]	YES	126	[Not Available]	[Not Available]	[Not Available]	142	NO	[Not Available]	[Not Available]	NO	[Not Available]	NO	[Not Available]	1	No	[Not Available]	[Not Available]	[Not Available]	[Not Available]	Alive	[Not Available]	[Not Available]	[Not Available]	[Not Available]
TCGA-55-8089	6/17/12	Lung Adenocarcinoma	YES	NO	Male	Lung	WHITE	NOT HISPANIC OR LATINO	[Not Available]	No	R-Upper	Peripheral Lung	2011	[Not Available]	[Not Available]	R0	7th	T1a	N0	M0	Stage IA	[Not Applicable]	[Not Applicable]	[Not Applicable]	[Not Applicable]	YES	70	[Not Available]	85	[Not Available]	90	YES	NO	[Not Available]	YES	[Not Available]	YES	[Not Available]	2	No	1973	[Not Available]	97	100	Dead	0	Preoperative	[Not Available]	[Not Available]
TCGA-55-8090	2007-08-12	Lung Adenocarcinoma	YES	NO	Male	Lung	WHITE	NOT HISPANIC OR LATINO	[Not Available]	Yes, History of Synchronous/Bilateral Malignancy	R-Lower	[Not Available]	2011	[Not Available]	[Not Available]	R0	7th	T1a	N0	M0	Stage IA	[Not Applicable]	[Not Applicable]	[Not Applicable]	[Not Applicable]	YES	83	6	103	4	58	[Not Available]	[Not Available]	[Not Available]	[Not Available]	[Not Available]	[Not Available]	[Not Available]	2	No	[Not Available]	[Not Available]	[Not Available]	[Not Available]	Dead	[Not Available]	[Not Available]	[Not Available]	[Not Available]
TCGA-55-8091	6/15/12	Lung Adenocarcinoma	YES	NO	Male	Lung	WHITE	NOT HISPANIC OR LATINO	[Not Available]	Yes, History of Prior Malignancy	R-Lower	[Not Available]	2011	[Not Available]	[Not Available]	R0	7th	T2	N0	MX	Stage IB	[Not Applicable]	[Not Applicable]	[Not Applicable]	[Not Applicable]	YES	82	[Not Available]	79	[Not Available]	65	NO	[Not Available]	[Not Available]	NO	[Not Available]	NO	[Not Available]	3	No	[Not Available]	1985	[Not Available]	[Not Available]	Alive	[Not Available]	[Not Available]	[Not Available]	[Not Available]
TCGA-55-8092	2007-08-12	Lung Adenocarcinoma	YES	NO	Male	Lung	WHITE	NOT HISPANIC OR LATINO	[Not Available]	No	R-Upper	[Not Available]	2012	[Not Available]	[Not Available]	R0	7th	T3	N0	MX	Stage IIB	[Not Applicable]	[Not Applicable]	[Not Applicable]	[Not Applicable]	YES	68	19	66	2	19	[Not Available]	[Not Available]	[Not Available]	[Not Available]	[Not Available]	[Not Available]	[Not Available]	4	No	1972	2012	40	[Not Available]	Dead	[Not Available]	[Not Available]	[Not Available]	[Not Available]
TCGA-55-8094	2007-08-12	Lung Adenocarcinoma	YES	NO	Male	Lung	WHITE	NOT HISPANIC OR LATINO	[Not Available]	No	L-Upper	Peripheral Lung	2012	[Not Available]	[Not Available]	R0	7th	T2b	N0	M1b	Stage IV	[Not Applicable]	[Not Applicable]	[Not Applicable]	[Not Applicable]	[Not Available]	[Not Available]	[Not Available]	[Not Available]	[Not Available]	[Not Available]	NO	[Not Available]	[Not Available]	YES	[Not Available]	YES	FISH	4	No	1976	2011	70	[Not Available]	Alive	[Not Available]	[Not Available]	[Not Available]	[Not Available]
TCGA-55-8096	6/17/12	Lung Adenocarcinoma	YES	NO	Female	Lung	WHITE	NOT HISPANIC OR LATINO	[Not Available]	No	L-Upper	Central Lung	2011	[Not Available]	[Not Available]	[Not Available]	7th	T2a	N0	MX	Stage IB	[Not Applicable]	[Not Applicable]	[Not Applicable]	[Not Applicable]	YES	55	[Not Available]	77	[Not Available]	[Not Available]	NO	[Not Available]	[Not Available]	NO	[Not Available]	NO	[Not Available]	2	No	1959	[Not Available]	104	70	Dead	2	Preoperative	[Not Available]	[Not Available]
TCGA-55-8097	6/15/12	Lung Adenocarcinoma	YES	NO	Female	Lung	WHITE	NOT HISPANIC OR LATINO	[Not Available]	No	R-Upper	[Not Available]	2012	[Not Available]	[Not Available]	R0	7th	T1a	N0	MX	Stage IA	[Not Applicable]	[Not Applicable]	[Not Applicable]	[Not Applicable]	YES	79	87	[Not Available]	[Not Available]	74	NO	[Not Available]	[Not Available]	NO	[Not Available]	NO	[Not Available]	4	No	1973	2008	35	[Not Available]	Alive	[Not Available]	[Not Available]	[Not Available]	[Not Available]
TCGA-55-8203	6/16/12	Lung Adenocarcinoma	YES	NO	Female	Lung	WHITE	NOT HISPANIC OR LATINO	[Not Available]	Yes, History of Prior Malignancy	R-Lower	[Not Available]	2011	[Not Available]	[Not Available]	R0	7th	T1b	N0	M0	Stage IA	[Not Applicable]	[Not Applicable]	[Not Applicable]	[Not Applicable]	YES	49	48	52	50	39	NO	[Not Available]	[Not Available]	NO	[Not Available]	NO	[Not Available]	2	No	[Not Available]	[Not Available]	50	[Not Available]	Alive	[Not Available]	[Not Available]	[Not Available]	[Not Available]
TCGA-55-8204	2007-08-12	Lung Adenocarcinoma	YES	NO	Female	Lung	WHITE	NOT HISPANIC OR LATINO	[Not Available]	Yes, History of Prior Malignancy	L-Upper	[Not Available]	2011	[Not Available]	[Not Available]	R0	7th	T2a	N0	MX	Stage IB	[Not Applicable]	[Not Applicable]	[Not Applicable]	[Not Applicable]	YES	85	[Not Available]	88	[Not Available]	101	[Not Available]	[Not Available]	[Not Available]	[Not Available]	[Not Available]	[Not Available]	[Not Available]	3	No	[Not Available]	[Not Available]	[Not Available]	[Not Available]	Alive	[Not Available]	[Not Available]	[Not Available]	[Not Available]
TCGA-55-8205	6/17/12	Lung Adenocarcinoma	YES	NO	Female	Lung	WHITE	NOT HISPANIC OR LATINO	[Not Available]	Yes, History of Prior Malignancy	R-Lower	Central Lung	2012	[Not Available]	[Not Available]	R0	7th	T2b	N0	M0	Stage IIA	[Not Applicable]	[Not Applicable]	[Not Applicable]	[Not Applicable]	YES	42	[Not Available]	73	[Not Available]	[Not Available]	YES	NO	[Not Available]	YES	[Not Available]	NO	[Not Available]	4	No	1951	2012	30	100	Alive	0	Preoperative	[Not Available]	[Not Available]
TCGA-55-8206	6/15/12	Lung Adenocarcinoma	YES	NO	Male	Lung	WHITE	NOT HISPANIC OR LATINO	[Not Available]	No	R-Upper	[Not Available]	2012	[Not Available]	[Not Available]	R0	7th	T1b	N0	M0	Stage IA	[Not Applicable]	[Not Applicable]	[Not Applicable]	[Not Applicable]	YES	84	[Not Available]	104	[Not Available]	98	[Not Available]	[Not Available]	[Not Available]	[Not Available]	[Not Available]	[Not Available]	[Not Available]	1	No	[Not Available]	[Not Available]	[Not Available]	[Not Available]	Alive	[Not Available]	[Not Available]	NO	[Not Available]
TCGA-55-8207	2007-08-12	Lung Adenocarcinoma	YES	NO	Male	Lung	WHITE	NOT HISPANIC OR LATINO	[Not Available]	Yes, History of Synchronous/Bilateral Malignancy	L-Lower	[Not Available]	2011	[Not Available]	[Not Available]	R0	7th	T2a	N0	MX	Stage IB	[Not Applicable]	[Not Applicable]	[Not Applicable]	[Not Applicable]	YES	84	83	86	84	48	[Not Available]	[Not Available]	[Not Available]	[Not Available]	[Not Available]	[Not Available]	[Not Available]	3	No	[Not Available]	[Not Available]	[Not Available]	[Not Available]	Alive	[Not Available]	[Not Available]	NO	[Not Available]
TCGA-55-8208	6/13/12	Lung Adenocarcinoma	YES	NO	Female	Lung	WHITE	NOT HISPANIC OR LATINO	[Not Available]	No	R-Upper	Peripheral Lung	2012	[Not Available]	[Not Available]	R0	7th	T1b	N0	M0	Stage IA	[Not Applicable]	[Not Applicable]	[Not Applicable]	[Not Applicable]	YES	156	151	72	68	50	[Not Available]	[Not Available]	[Not Available]	[Not Available]	[Not Available]	[Not Available]	[Not Available]	2	No	[Not Available]	[Not Available]	50	100	Alive	0	Preoperative	[Not Available]	[Not Available]
TCGA-55-8299	2010-08-12	Lung Adenocarcinoma	YES	NO	Female	Lung	WHITE	NOT HISPANIC OR LATINO	[Not Available]	No	R-Upper	[Not Available]	2012	[Not Available]	[Not Available]	R0	7th	T1b	N0	MX	Stage IA	[Not Applicable]	[Not Applicable]	[Not Applicable]	[Not Applicable]	YES	74	[Not Available]	75	[Not Available]	[Not Available]	[Not Available]	[Not Available]	[Not Available]	[Not Available]	[Not Available]	[Not Available]	[Not Available]	4	No	1971	2012	20	[Not Available]	Dead	[Not Available]	[Not Available]	NO	[Not Available]
TCGA-55-8301	2010-03-12	Lung Adenocarcinoma	YES	NO	Male	Lung	WHITE	NOT HISPANIC OR LATINO	[Not Available]	No	R-Lower	[Not Available]	2012	[Not Available]	[Not Available]	R0	7th	T2a	N0	MX	Stage IB	[Not Applicable]	[Not Applicable]	[Not Applicable]	[Not Applicable]	[Not Available]	[Not Available]	[Not Available]	[Not Available]	[Not Available]	[Not Available]	[Not Available]	[Not Available]	[Not Available]	[Not Available]	[Not Available]	[Not Available]	[Not Available]	2	No	1962	[Not Available]	100	[Not Available]	Alive	[Not Available]	[Not Available]	NO	[Not Available]
TCGA-55-8302	2012-03-12	Lung Adenocarcinoma	YES	NO	Male	Lung	WHITE	[Not Available]	[Not Available]	No	R-Lower	[Not Available]	2012	[Not Available]	[Not Available]	R0	7th	T2	N0	MX	Stage IB	[Not Applicable]	[Not Applicable]	[Not Applicable]	[Not Applicable]	[Not Available]	[Not Available]	[Not Available]	[Not Available]	[Not Available]	[Not Available]	[Not Available]	[Not Available]	[Not Available]	[Not Available]	[Not Available]	[Not Available]	[Not Available]	2	No	1965	[Not Available]	59	[Not Available]	Alive	[Not Available]	[Not Available]	NO	[Not Available]
TCGA-55-8505	12/28/12	Lung Adenocarcinoma	YES	NO	Male	Lung	WHITE	NOT HISPANIC OR LATINO	[Not Available]	No	R-Lower	[Not Available]	2012	[Not Available]	[Not Available]	R0	7th	T1a	N2	MX	Stage IIIA	[Not Applicable]	[Not Applicable]	[Not Applicable]	[Not Applicable]	[Not Available]	[Not Available]	[Not Available]	[Not Available]	[Not Available]	[Not Available]	[Not Available]	[Not Available]	[Not Available]	[Not Available]	[Not Available]	[Not Available]	[Not Available]	1	No	[Not Available]	[Not Available]	[Not Available]	[Not Available]	Alive	[Not Available]	[Not Available]	[Not Available]	[Not Available]
TCGA-55-8506	12/28/12	Lung Adenocarcinoma	YES	NO	Female	Lung	WHITE	NOT HISPANIC OR LATINO	[Not Available]	No	R-Upper	Peripheral Lung	2012	[Not Available]	[Not Available]	R0	7th	T3	N0	MX	Stage IIB	[Not Applicable]	[Not Applicable]	[Not Applicable]	[Not Applicable]	[Not Available]	[Not Available]	[Not Available]	[Not Available]	[Not Available]	[Not Available]	[Not Available]	[Not Available]	[Not Available]	[Not Available]	[Not Available]	[Not Available]	[Not Available]	2	No	1972	[Not Available]	[Not Available]	[Not Available]	Alive	[Not Available]	[Not Available]	[Not Available]	[Not Available]
TCGA-55-8507	12/28/12	Lung Adenocarcinoma	YES	NO	Male	Lung	WHITE	NOT HISPANIC OR LATINO	[Not Available]	No	R-Upper	Peripheral Lung	2012	[Not Available]	[Not Available]	R0	7th	T1a	N0	MX	Stage IA	[Not Applicable]	[Not Applicable]	[Not Applicable]	[Not Applicable]	[Not Available]	[Not Available]	[Not Available]	[Not Available]	[Not Available]	[Not Available]	[Not Available]	[Not Available]	[Not Available]	[Not Available]	[Not Available]	[Not Available]	[Not Available]	2	No	1972	[Not Available]	120	40	Alive	3	Other	NO	[Not Available]
TCGA-55-8508	12/28/12	Lung Adenocarcinoma	YES	NO	Female	Lung	BLACK OR AFRICAN AMERICAN	NOT HISPANIC OR LATINO	[Not Available]	No	R-Upper	Central Lung	2012	[Not Available]	[Not Available]	R0	7th	T2a	N1	MX	Stage IIA	[Not Applicable]	[Not Applicable]	[Not Applicable]	[Not Applicable]	[Not Available]	[Not Available]	[Not Available]	[Not Available]	[Not Available]	[Not Available]	[Not Available]	[Not Available]	[Not Available]	[Not Available]	[Not Available]	[Not Available]	[Not Available]	2	No	[Not Available]	[Not Available]	[Not Available]	60	Alive	2	Preoperative	NO	[Not Available]
TCGA-55-8510	2001-11-13	Lung Adenocarcinoma	YES	NO	Female	Lung	WHITE	NOT HISPANIC OR LATINO	[Not Available]	No	R-Lower	[Not Available]	2012	[Not Available]	[Not Available]	R0	7th	T2a	N0	MX	Stage IB	[Not Applicable]	[Not Applicable]	[Not Applicable]	[Not Applicable]	YES	70	70	98	90	54	[Not Available]	[Not Available]	[Not Available]	[Not Available]	[Not Available]	[Not Available]	[Not Available]	2	No	[Not Available]	[Not Available]	[Not Available]	[Not Available]	Alive	[Not Available]	[Not Available]	NO	[Not Available]
TCGA-55-8511	2001-11-13	Lung Adenocarcinoma	YES	NO	Female	Lung	WHITE	NOT HISPANIC OR LATINO	[Not Available]	Yes, History of Prior Malignancy	R-Upper	[Not Available]	2012	[Not Available]	[Not Available]	R0	7th	T2a	N0	MX	Stage IB	[Not Applicable]	[Not Applicable]	[Not Applicable]	[Not Applicable]	YES	53	[Not Available]	82	[Not Available]	31	[Not Available]	[Not Available]	[Not Available]	[Not Available]	[Not Available]	[Not Available]	[Not Available]	2	No	1953	[Not Available]	58	70	Alive	2	Preoperative	NO	[Not Available]
TCGA-55-8512	2001-11-13	Lung Adenocarcinoma	YES	NO	Male	Lung	WHITE	NOT HISPANIC OR LATINO	[Not Available]	No	R-Lower	[Not Available]	2012	[Not Available]	[Not Available]	R0	7th	T1a	N1	M1b	Stage IV	[Not Applicable]	[Not Applicable]	[Not Applicable]	[Not Applicable]	NO	[Not Available]	[Not Available]	[Not Available]	[Not Available]	[Not Available]	[Not Available]	[Not Available]	[Not Available]	[Not Available]	[Not Available]	[Not Available]	[Not Available]	2	No	1989	[Not Available]	19	90	Dead	1	Preoperative	[Not Available]	[Not Available]
TCGA-55-8513	2001-11-13	Lung Adenocarcinoma	YES	NO	Female	Lung	WHITE	NOT HISPANIC OR LATINO	[Not Available]	No	L-Lower	[Not Available]	2012	[Not Available]	[Not Available]	R0	7th	T3	N0	MX	Stage IIB	[Not Applicable]	[Not Applicable]	[Not Applicable]	[Not Applicable]	YES	87	[Not Available]	108	[Not Available]	65	[Not Available]	[Not Available]	[Not Available]	YES	[Not Available]	YES	[Not Available]	1	No	[Not Available]	[Not Available]	[Not Available]	[Not Available]	Alive	[Not Available]	[Not Available]	NO	[Not Available]
TCGA-55-8514	2001-11-13	Lung Adenocarcinoma	YES	NO	Female	Lung	BLACK OR AFRICAN AMERICAN	NOT HISPANIC OR LATINO	[Not Available]	No	R-Upper	[Not Available]	2012	[Not Available]	[Not Available]	R0	7th	T2a	N0	MX	Stage IB	[Not Applicable]	[Not Applicable]	[Not Applicable]	[Not Applicable]	YES	85	[Not Available]	114	[Not Available]	90	[Not Available]	[Not Available]	[Not Available]	[Not Available]	[Not Available]	[Not Available]	[Not Available]	4	No	1971	2011	20	[Not Available]	Alive	[Not Available]	[Not Available]	NO	[Not Available]
TCGA-55-8614	2001-11-13	Lung Adenocarcinoma	YES	NO	Male	Lung	WHITE	NOT HISPANIC OR LATINO	[Not Available]	No	L-Upper	[Not Available]	2011	[Not Available]	[Not Available]	R0	7th	T2a	N0	MX	Stage IB	[Not Applicable]	[Not Applicable]	[Not Applicable]	[Not Applicable]	YES	94	[Not Available]	[Not Available]	[Not Available]	113	[Not Available]	[Not Available]	[Not Available]	[Not Available]	[Not Available]	[Not Available]	[Not Available]	3	No	[Not Available]	1995	40	[Not Available]	Alive	[Not Available]	[Not Available]	NO	[Not Available]
TCGA-55-8615	2001-11-13	Lung Adenocarcinoma	YES	NO	Male	Lung	WHITE	NOT HISPANIC OR LATINO	[Not Available]	No	R-Middle	[Not Available]	2012	[Not Available]	[Not Available]	R0	7th	T3	N2	MX	Stage IIIA	[Not Applicable]	[Not Applicable]	[Not Applicable]	[Not Applicable]	YES	88	[Not Available]	[Not Available]	[Not Available]	83	[Not Available]	[Not Available]	[Not Available]	[Not Available]	[Not Available]	[Not Available]	[Not Available]	2	No	1966	[Not Available]	67	[Not Available]	Alive	[Not Available]	[Not Available]	NO	[Not Available]
TCGA-55-8616	12/28/12	Lung Adenocarcinoma	YES	NO	Female	Lung	WHITE	NOT HISPANIC OR LATINO	[Not Available]	No	R-Upper	[Not Available]	2012	[Not Available]	[Not Available]	R0	7th	T2a	N0	M0	Stage IB	[Not Applicable]	[Not Applicable]	[Not Applicable]	[Not Applicable]	[Not Available]	[Not Available]	[Not Available]	[Not Available]	[Not Available]	[Not Available]	[Not Available]	[Not Available]	[Not Available]	[Not Available]	[Not Available]	[Not Available]	[Not Available]	4	No	[Not Available]	1999	[Not Available]	[Not Available]	Alive	0	Preoperative	[Not Available]	[Not Available]
TCGA-55-8619	2001-11-13	Lung Adenocarcinoma	YES	NO	Female	Lung	WHITE	NOT HISPANIC OR LATINO	[Not Available]	Yes, History of Prior Malignancy	R-Lower	[Not Available]	2012	[Not Available]	[Not Available]	R0	7th	T3	N0	MX	Stage IIB	[Not Applicable]	[Not Applicable]	[Not Applicable]	[Not Applicable]	[Not Available]	[Not Available]	[Not Available]	[Not Available]	[Not Available]	[Not Available]	[Not Available]	[Not Available]	[Not Available]	[Not Available]	[Not Available]	[Not Available]	[Not Available]	1	No	[Not Available]	[Not Available]	[Not Available]	90	Alive	[Not Available]	Preoperative	NO	[Not Available]
TCGA-55-8620	2001-11-13	Lung Adenocarcinoma	YES	NO	Male	Lung	WHITE	NOT HISPANIC OR LATINO	[Not Available]	No	L-Upper	Central Lung	2012	[Not Available]	[Not Available]	R0	7th	T1a	N1	M1b	Stage IV	[Not Applicable]	[Not Applicable]	[Not Applicable]	[Not Applicable]	YES	76	[Not Available]	73	[Not Available]	64	NO	[Not Available]	[Not Available]	NO	[Not Available]	NO	[Not Available]	4	No	1965	2012	154	70	Dead	2	Preoperative	YES	[Not Available]
TCGA-55-8621	2001-11-13	Lung Adenocarcinoma	YES	NO	Female	Lung	WHITE	NOT HISPANIC OR LATINO	[Not Available]	Yes, History of Prior Malignancy	L-Lower	[Not Available]	2012	[Not Available]	[Not Available]	R0	7th	T1a	N0	MX	Stage IA	[Not Applicable]	[Not Applicable]	[Not Applicable]	[Not Applicable]	YES	105	105	110	112	[Not Available]	[Not Available]	[Not Available]	[Not Available]	[Not Available]	[Not Available]	[Not Available]	[Not Available]	4	No	1980	2010	30	[Not Available]	Alive	[Not Available]	[Not Available]	NO	[Not Available]
TCGA-55-A48X	2/21/13	Lung Adenocarcinoma	YES	NO	Female	Lung	WHITE	NOT HISPANIC OR LATINO	[Not Available]	Yes, History of Prior Malignancy	L-Lower	[Not Available]	2012	[Not Available]	[Not Available]	R0	7th	T1b	N1	M0	Stage IIA	[Not Applicable]	[Not Applicable]	[Not Applicable]	[Not Applicable]	YES	57	[Not Available]	[Not Available]	[Not Available]	79	[Not Available]	[Not Available]	[Not Available]	[Not Available]	[Not Available]	[Not Available]	[Not Available]	4	No	1963	1999	36	[Not Available]	Alive	[Not Available]	[Not Available]	[Not Available]	[Not Available]
TCGA-55-A48Y	2/21/13	Lung Adenocarcinoma	YES	NO	Male	Lung	WHITE	NOT HISPANIC OR LATINO	[Not Available]	No	L-Lower	[Not Available]	2012	[Not Available]	[Not Available]	R0	7th	T2b	N0	M0	Stage IIA	[Not Applicable]	[Not Applicable]	[Not Applicable]	[Not Applicable]	YES	38	[Not Available]	[Not Available]	[Not Available]	42	[Not Available]	[Not Available]	[Not Available]	[Not Available]	[Not Available]	[Not Available]	[Not Available]	2	No	1962	[Not Available]	50	[Not Available]	Alive	[Not Available]	[Not Available]	[Not Available]	[Not Available]
TCGA-55-A48Z	2/21/13	Lung Adenocarcinoma	YES	NO	Female	Lung	WHITE	NOT HISPANIC OR LATINO	[Not Available]	No	R-Upper	Central Lung	2012	[Not Available]	[Not Available]	R0	7th	T1a	N3	MX	Stage IIIB	[Not Applicable]	[Not Applicable]	[Not Applicable]	[Not Applicable]	YES	87	[Not Available]	85	[Not Available]	110	YES	NO	[Not Available]	YES	Other	YES	FISH	4	No	1972	2012	40	70	Alive	2	Preoperative	[Not Available]	[Not Available]
TCGA-55-A490	2/21/13	Lung Adenocarcinoma	YES	NO	Male	Lung	WHITE	NOT HISPANIC OR LATINO	[Not Available]	No	R-Upper	Peripheral Lung	2012	[Not Available]	[Not Available]	R0	7th	T2b	N0	MX	Stage IIA	[Not Applicable]	[Not Applicable]	[Not Applicable]	[Not Applicable]	YES	56	[Not Available]	60	[Not Available]	40	YES	YES	G12C	YES	[Not Available]	YES	FISH	3	No	1951	1985	34	80	Dead	1	Preoperative	[Not Available]	[Not Available]
TCGA-55-A491	2/21/13	Lung Adenocarcinoma	YES	NO	Female	Lung	WHITE	NOT HISPANIC OR LATINO	[Not Available]	Yes, History of Prior Malignancy	L-Lower	[Not Available]	2012	[Not Available]	[Not Available]	R0	7th	T1b	N0	MX	Stage IA	[Not Applicable]	[Not Applicable]	[Not Applicable]	[Not Applicable]	YES	64	68	72	73	68	NO	[Not Available]	[Not Available]	NO	[Not Available]	NO	[Not Available]	3	No	1952	1982	45	[Not Available]	Alive	[Not Available]	[Not Available]	[Not Available]	[Not Available]
TCGA-55-A492	2/21/13	Lung Adenocarcinoma	YES	NO	Female	Lung	WHITE	NOT HISPANIC OR LATINO	[Not Available]	Yes, History of Prior Malignancy	R-Upper	[Not Available]	2012	[Not Available]	[Not Available]	R0	7th	T1a	N0	MX	Stage IA	[Not Applicable]	[Not Applicable]	[Not Applicable]	[Not Applicable]	YES	95	92	[Not Available]	[Not Available]	52	NO	[Not Available]	[Not Available]	NO	[Not Available]	NO	[Not Available]	3	No	1962	1995	35	[Not Available]	Alive	[Not Available]	[Not Available]	[Not Available]	[Not Available]
TCGA-55-A493	2/21/13	Lung Adenocarcinoma	YES	NO	Female	Lung	WHITE	NOT HISPANIC OR LATINO	[Not Available]	No	R-Upper	[Not Available]	2012	[Not Available]	[Not Available]	R0	7th	T2a	N0	M0	Stage IB	[Not Applicable]	[Not Applicable]	[Not Applicable]	[Not Applicable]	NO	2	2	65	71	102	NO	[Not Available]	[Not Available]	NO	[Not Available]	NO	[Not Available]	2	No	1977	[Not Available]	53	[Not Available]	Alive	[Not Available]	[Not Available]	[Not Available]	[Not Available]
TCGA-55-A494	2/21/13	Lung Adenocarcinoma	YES	NO	Female	Lung	WHITE	NOT HISPANIC OR LATINO	[Not Available]	No	R-Lower	Peripheral Lung	2012	[Not Available]	[Not Available]	R0	7th	T2a	N0	MX	Stage IB	[Not Applicable]	[Not Applicable]	[Not Applicable]	[Not Applicable]	YES	77	[Not Available]	95	[Not Available]	76	YES	YES	G12D	YES	[Not Available]	YES	FISH	3	No	1967	1980	7	80	Alive	1	Preoperative	[Not Available]	[Not Available]
TCGA-55-A4DF	1/25/13	Lung Adenocarcinoma	YES	NO	Male	Lung	WHITE	NOT HISPANIC OR LATINO	[Not Available]	Yes, History of Synchronous/Bilateral Malignancy	R-Lower	[Not Available]	2012	[Not Available]	[Not Available]	R0	7th	T1b	N0	MX	Stage IA	[Not Applicable]	[Not Applicable]	[Not Applicable]	[Not Applicable]	YES	47	58	[Not Available]	[Not Available]	82	[Not Available]	[Not Available]	[Not Available]	[Not Available]	[Not Available]	[Not Available]	[Not Available]	3	No	[Not Available]	1984	60	[Not Available]	Dead	[Not Available]	[Not Available]	NO	[Not Available]
TCGA-55-A4DG	1/25/13	Lung Adenocarcinoma	YES	NO	Male	Lung	WHITE	NOT HISPANIC OR LATINO	[Not Available]	No	R-Upper	[Not Available]	2012	[Not Available]	[Not Available]	R0	7th	T1b	N0	MX	Stage IA	[Not Applicable]	[Not Applicable]	[Not Applicable]	[Not Applicable]	YES	[Not Available]	[Not Available]	73	[Not Available]	61	[Not Available]	[Not Available]	[Not Available]	[Not Available]	[Not Available]	[Not Available]	[Not Available]	4	No	[Not Available]	2012	100	[Not Available]	Alive	[Not Available]	[Not Available]	NO	[Not Available]
TCGA-55-A57B	5/31/13	Lung Adenocarcinoma	YES	NO	Female	Lung	BLACK OR AFRICAN AMERICAN	NOT HISPANIC OR LATINO	[Not Available]	No	L-Upper	Peripheral Lung	2012	[Not Available]	[Not Available]	R0	7th	T1b	N0	M0	Stage IA	[Not Applicable]	[Not Applicable]	[Not Applicable]	[Not Applicable]	YES	114	[Not Available]	99	[Not Available]	77	NO	[Not Available]	[Not Available]	NO	[Not Available]	NO	[Not Available]	1	No	[Not Available]	[Not Available]	[Not Available]	90	Alive	0	Preoperative	[Not Available]	[Not Available]
TCGA-62-8394	2007-05-12	Lung Adenocarcinoma	NO	YES	Female	Lung	WHITE	NOT HISPANIC OR LATINO	[Not Available]	No	L-Lower	Central Lung	2008	[Not Available]	[Not Available]	R0	6th	T4	N2	M0	Stage IIIB	[Not Applicable]	[Not Applicable]	[Not Applicable]	[Not Applicable]	YES	115	[Not Available]	74	[Not Available]	[Not Available]	NO	[Not Available]	[Not Available]	NO	[Not Available]	NO	[Not Available]	1	No	[Not Available]	[Not Available]	[Not Available]	100	Dead	[Not Available]	Preoperative	NO	[Not Available]
TCGA-62-8395	2007-04-12	Lung Adenocarcinoma	NO	YES	Female	Lung	WHITE	NOT HISPANIC OR LATINO	[Not Available]	No	R-Upper	Central Lung	2009	[Not Available]	[Not Available]	R0	6th	T3	N0	M0	Stage IIB	[Not Applicable]	[Not Applicable]	[Not Applicable]	[Not Applicable]	YES	130	[Not Available]	86	[Not Available]	[Not Available]	NO	[Not Available]	[Not Available]	YES	[Not Available]	NO	[Not Available]	1	No	[Not Available]	[Not Available]	[Not Available]	100	Alive	0	Preoperative	NO	[Not Available]
TCGA-62-8397	2007-04-12	Lung Adenocarcinoma	NO	YES	Female	Lung	WHITE	NOT HISPANIC OR LATINO	[Not Available]	No	R-Lower	Peripheral Lung	2008	[Not Available]	[Not Available]	R0	6th	T3	N0	M0	Stage IIB	[Not Applicable]	[Not Applicable]	[Not Applicable]	[Not Applicable]	YES	86	[Not Available]	64	[Not Available]	[Not Available]	NO	[Not Available]	[Not Available]	NO	[Not Available]	NO	[Not Available]	1	No	[Not Available]	[Not Available]	[Not Available]	90	Alive	0	Preoperative	NO	[Not Available]
TCGA-62-8398	2007-04-12	Lung Adenocarcinoma	NO	YES	Male	Lung	WHITE	NOT HISPANIC OR LATINO	[Not Available]	No	R-Lower	Central Lung	2007	[Not Available]	[Not Available]	R0	6th	T2	N2	M0	Stage IIIA	[Not Applicable]	[Not Applicable]	[Not Applicable]	[Not Applicable]	YES	64	[Not Available]	72	[Not Available]	[Not Available]	NO	[Not Available]	[Not Available]	NO	[Not Available]	NO	[Not Available]	4	No	1970	1999	20	100	Dead	[Not Available]	Preoperative	NO	[Not Available]
TCGA-62-8399	2007-04-12	Lung Adenocarcinoma	NO	YES	Male	Lung	WHITE	NOT HISPANIC OR LATINO	[Not Available]	No	L-Upper	Peripheral Lung	2006	[Not Available]	[Not Available]	R0	6th	T2	N2	M0	Stage IIIA	[Not Applicable]	[Not Applicable]	[Not Applicable]	[Not Applicable]	YES	32	[Not Available]	48	[Not Available]	[Not Available]	NO	[Not Available]	[Not Available]	NO	[Not Available]	NO	[Not Available]	4	No	[Not Available]	[Not Available]	70	100	Alive	[Not Available]	Preoperative	NO	[Not Available]
TCGA-62-8402	2007-04-12	Lung Adenocarcinoma	NO	YES	Female	Lung	WHITE	NOT HISPANIC OR LATINO	[Not Available]	No	R-Upper	Peripheral Lung	2008	[Not Available]	[Not Available]	R0	6th	T2	N2	M0	Stage IIIA	[Not Applicable]	[Not Applicable]	[Not Applicable]	[Not Applicable]	YES	134	[Not Available]	80	[Not Available]	[Not Available]	NO	[Not Available]	[Not Available]	YES	Exon 19 Deletion	NO	[Not Available]	1	No	[Not Available]	[Not Available]	[Not Available]	100	Dead	0	Preoperative	YES	[Not Available]
TCGA-62-A46O	10/29/12	Lung Adenocarcinoma	NO	YES	Female	Lung	WHITE	NOT HISPANIC OR LATINO	[Not Available]	No	R-Lower	Central Lung	2006	[Not Available]	[Not Available]	R0	6th	T2	N0	M0	Stage IB	[Not Applicable]	[Not Applicable]	[Not Applicable]	[Not Applicable]	YES	106	[Not Available]	65	[Not Available]	[Not Available]	NO	[Not Available]	[Not Available]	NO	[Not Available]	NO	[Not Available]	2	No	[Not Available]	[Not Available]	48	100	Dead	[Not Available]	Preoperative	NO	[Not Available]
TCGA-62-A46P	10/29/12	Lung Adenocarcinoma	NO	YES	Male	Lung	WHITE	NOT HISPANIC OR LATINO	[Not Available]	No	L-Upper	Central Lung	2006	[Not Available]	[Not Available]	R0	6th	T2	N0	M0	Stage IB	[Not Applicable]	[Not Applicable]	[Not Applicable]	[Not Applicable]	YES	78	[Not Available]	66	[Not Available]	[Not Available]	NO	[Not Available]	[Not Available]	NO	[Not Available]	NO	[Not Available]	4	No	[Not Available]	[Not Available]	40	100	Dead	[Not Available]	Preoperative	NO	[Not Available]
TCGA-62-A46R	10/29/12	Lung Adenocarcinoma	NO	YES	Female	Lung	WHITE	NOT HISPANIC OR LATINO	[Not Available]	No	L-Lower	Central Lung	2006	[Not Available]	[Not Available]	R0	6th	T2	N0	M0	Stage IB	[Not Applicable]	[Not Applicable]	[Not Applicable]	[Not Applicable]	YES	74	[Not Available]	73	[Not Available]	[Not Available]	NO	[Not Available]	[Not Available]	NO	[Not Available]	NO	[Not Available]	4	No	[Not Available]	[Not Available]	25	100	Dead	[Not Available]	Preoperative	NO	[Not Available]
TCGA-62-A46S	10/29/12	Lung Adenocarcinoma	NO	YES	Male	Lung	WHITE	NOT HISPANIC OR LATINO	[Not Available]	No	L-Upper	Peripheral Lung	2007	[Not Available]	[Not Available]	R0	6th	T2	N0	M0	Stage IB	[Not Applicable]	[Not Applicable]	[Not Applicable]	[Not Applicable]	YES	72	[Not Available]	66	[Not Available]	[Not Available]	NO	[Not Available]	[Not Available]	NO	[Not Available]	NO	[Not Available]	4	No	[Not Available]	[Not Available]	40	100	Dead	0	Preoperative	NO	[Not Available]
TCGA-62-A46U	10/30/12	Lung Adenocarcinoma	NO	YES	Female	Lung	WHITE	NOT HISPANIC OR LATINO	[Not Available]	No	R-Lower	Central Lung	2007	[Not Available]	[Not Available]	R0	6th	T2	N1	M0	Stage IIB	[Not Applicable]	[Not Applicable]	[Not Applicable]	[Not Applicable]	YES	131	[Not Available]	81	[Not Available]	[Not Available]	NO	[Not Available]	[Not Available]	NO	[Not Available]	NO	[Not Available]	1	No	[Not Available]	[Not Available]	[Not Available]	100	Alive	[Not Available]	Preoperative	NO	[Not Available]
TCGA-62-A46V	10/30/12	Lung Adenocarcinoma	NO	YES	Female	Lung	WHITE	NOT HISPANIC OR LATINO	[Not Available]	No	L-Lower	Peripheral Lung	2007	[Not Available]	[Not Available]	R0	6th	T2	N0	M0	Stage IB	[Not Applicable]	[Not Applicable]	[Not Applicable]	[Not Applicable]	YES	100	[Not Available]	51	[Not Available]	[Not Available]	NO	[Not Available]	[Not Available]	NO	[Not Available]	NO	[Not Available]	3	No	[Not Available]	[Not Available]	[Not Available]	90	Alive	[Not Available]	Preoperative	NO	[Not Available]
TCGA-62-A46Y	10/30/12	Lung Adenocarcinoma	NO	YES	Female	Lung	WHITE	NOT HISPANIC OR LATINO	[Not Available]	No	R-Lower	Peripheral Lung	2008	[Not Available]	[Not Available]	R0	6th	T2	N2	M0	Stage IIIA	[Not Applicable]	[Not Applicable]	[Not Applicable]	[Not Applicable]	YES	88	[Not Available]	84	[Not Available]	[Not Available]	NO	[Not Available]	[Not Available]	NO	[Not Available]	NO	[Not Available]	1	No	[Not Available]	[Not Available]	[Not Available]	90	Dead	[Not Available]	Preoperative	YES	[Not Available]
TCGA-62-A470	10/30/12	Lung Adenocarcinoma	NO	YES	Male	Lung	WHITE	NOT HISPANIC OR LATINO	[Not Available]	No	R-Upper	Central Lung	2009	[Not Available]	[Not Available]	R0	6th	T2	N0	M0	Stage IB	[Not Applicable]	[Not Applicable]	[Not Applicable]	[Not Applicable]	YES	111	[Not Available]	74	[Not Available]	[Not Available]	NO	[Not Available]	[Not Available]	NO	[Not Available]	NO	[Not Available]	3	No	[Not Available]	[Not Available]	30	100	Dead	0	Preoperative	NO	[Not Available]
TCGA-62-A471	10/30/12	Lung Adenocarcinoma	NO	YES	Male	Lung	WHITE	NOT HISPANIC OR LATINO	[Not Available]	No	L-Upper	Peripheral Lung	2010	[Not Available]	[Not Available]	R0	7th	T2b	N1	M0	Stage IIB	[Not Applicable]	[Not Applicable]	[Not Applicable]	[Not Applicable]	YES	104	[Not Available]	75	[Not Available]	[Not Available]	NO	[Not Available]	[Not Available]	NO	[Not Available]	NO	[Not Available]	4	No	[Not Available]	2006	30	100	Alive	0	Preoperative	NO	[Not Available]
TCGA-62-A472	10/30/12	Lung Adenocarcinoma	NO	YES	Male	Lung	WHITE	NOT HISPANIC OR LATINO	[Not Available]	No	R-Lower	Central Lung	2011	[Not Available]	[Not Available]	R0	7th	T3	N0	M0	Stage IIB	[Not Applicable]	[Not Applicable]	[Not Applicable]	[Not Applicable]	YES	87	[Not Available]	70	[Not Available]	[Not Available]	NO	[Not Available]	[Not Available]	NO	[Not Available]	NO	[Not Available]	2	No	[Not Available]	[Not Available]	60	80	Alive	1	Preoperative	NO	[Not Available]
TCGA-64-1676	11/15/10	Lung Adenocarcinoma	NO	YES	Male	Lung	WHITE	NOT HISPANIC OR LATINO	[Not Available]	No	R-Lower	Central Lung	2005	[Not Available]	[Not Available]	R0	[Not Available]	T1a	N0	M0	Stage IA	[Not Applicable]	[Not Applicable]	[Not Applicable]	[Not Applicable]	[Not Available]	[Not Available]	[Not Available]	[Not Available]	[Not Available]	[Not Available]	[Not Available]	[Not Available]	[Not Available]	[Not Available]	[Not Available]	[Not Available]	[Not Available]	2	No	[Not Available]	[Not Available]	60	[Not Available]	Alive	[Not Available]	[Not Available]	[Not Available]	[Not Available]
TCGA-64-1677	2/18/11	Lung Adenocarcinoma	NO	YES	Female	Lung	WHITE	NOT HISPANIC OR LATINO	[Not Available]	Yes	R-Lower	[Not Available]	2005	[Not Available]	[Not Available]	R0	[Not Available]	T2	N2	M0	Stage IIIA	[Not Applicable]	[Not Applicable]	[Not Applicable]	[Not Applicable]	[Not Available]	[Not Available]	[Not Available]	[Not Available]	[Not Available]	[Not Available]	[Not Available]	[Not Available]	[Not Available]	[Not Available]	[Not Available]	[Not Available]	[Not Available]	2	No	1955	[Not Available]	50	0	Dead	[Not Available]	[Not Available]	[Not Available]	[Not Available]
TCGA-64-1678	11/15/10	Lung Adenocarcinoma	NO	YES	Female	Lung	WHITE	NOT HISPANIC OR LATINO	[Not Available]	No	R-Middle	[Not Available]	2006	[Not Available]	[Not Available]	R0	6th	T2b	N0	M0	[Discrepancy]	[Not Applicable]	[Not Applicable]	[Not Applicable]	[Not Applicable]	[Not Available]	[Not Available]	[Not Available]	[Not Available]	[Not Available]	[Not Available]	[Not Available]	[Not Available]	[Not Available]	[Not Available]	[Not Available]	[Not Available]	[Not Available]	3	No	1970	1990	20	[Not Available]	Alive	[Not Available]	[Not Available]	[Not Available]	[Not Available]
TCGA-64-1679	12/21/11	Lung Adenocarcinoma	NO	YES	Female	Lung	WHITE	NOT HISPANIC OR LATINO	[Not Available]	No	R-Upper	[Not Available]	2007	[Not Available]	[Not Available]	R0	6th	T1	N2	M0	Stage IIIA	[Not Applicable]	[Not Applicable]	[Not Applicable]	[Not Applicable]	YES	[Not Available]	[Not Available]	[Not Available]	[Not Available]	[Not Available]	NO	[Not Available]	[Not Available]	[Not Available]	[Not Available]	[Not Available]	[Not Available]	2	No	[Not Available]	[Not Available]	40	[Not Available]	Alive	0	Post-Adjuvant Therapy	[Not Available]	[Not Available]
TCGA-64-1680	11/16/10	Lung Adenocarcinoma	NO	YES	Male	Lung	WHITE	NOT HISPANIC OR LATINO	[Not Available]	No	R-Middle	[Not Available]	2007	[Not Available]	[Not Available]	R0	6th	T2a	N2	M1	Stage IV	[Not Applicable]	[Not Applicable]	[Not Applicable]	[Not Applicable]	[Not Available]	[Not Available]	[Not Available]	[Not Available]	[Not Available]	[Not Available]	[Not Available]	[Not Available]	[Not Available]	[Not Available]	[Not Available]	[Not Available]	[Not Available]	3	No	1962	1982	50	[Not Available]	Alive	[Not Available]	[Not Available]	[Not Available]	[Not Available]
TCGA-64-1681	12/21/11	Lung Adenocarcinoma	NO	YES	Female	Lung	WHITE	NOT HISPANIC OR LATINO	[Not Available]	No	R-Upper	[Not Available]	2008	[Not Available]	[Not Available]	R0	6th	T1	N0	M0	Stage IA	[Not Applicable]	[Not Applicable]	[Not Applicable]	[Not Applicable]	[Not Available]	[Not Available]	[Not Available]	[Not Available]	[Not Available]	[Not Available]	YES	NO	[Not Available]	YES	Exon 19 Deletion	[Not Available]	[Not Available]	3	No	1968	1988	[Not Available]	0	Dead	[Not Available]	[Not Available]	[Not Available]	[Not Available]
TCGA-64-5774	2005-02-11	Lung Adenocarcinoma	NO	YES	Male	Lung	WHITE	NOT HISPANIC OR LATINO	[Not Available]	No	[Discrepancy]	Central Lung	2004	[Not Available]	[Not Available]	R0	6th	T2	N0	M0	Stage IB	[Not Applicable]	[Not Applicable]	[Not Applicable]	[Not Applicable]	YES	72	[Not Available]	71	[Not Available]	95	[Not Available]	[Not Available]	[Not Available]	[Not Available]	[Not Available]	[Not Available]	[Not Available]	4	No	1959	2004	45	[Not Available]	Alive	[Not Available]	[Not Available]	[Not Available]	[Not Available]
TCGA-64-5775	2005-02-11	Lung Adenocarcinoma	NO	YES	Male	Lung	WHITE	NOT HISPANIC OR LATINO	[Not Available]	No	L-Upper	[Not Available]	2005	[Not Available]	[Not Available]	R0	[Not Available]	T4	N0	M0	Stage IIIA	[Not Applicable]	[Not Applicable]	[Not Applicable]	[Not Applicable]	[Not Available]	[Not Available]	[Not Available]	[Not Available]	[Not Available]	[Not Available]	[Not Available]	[Not Available]	[Not Available]	[Not Available]	[Not Available]	[Not Available]	[Not Available]	2	Yes	1950	[Not Available]	110	[Not Available]	Dead	[Not Available]	[Not Available]	[Not Available]	[Not Available]
TCGA-64-5778	2005-02-11	Lung Adenocarcinoma	NO	YES	Male	Lung	WHITE	NOT HISPANIC OR LATINO	[Not Available]	No	R-Upper	Central Lung	2008	[Not Available]	[Not Available]	R0	6th	T2	N0	M0	Stage IB	[Not Applicable]	[Not Applicable]	[Not Applicable]	[Not Applicable]	YES	[Not Available]	[Not Available]	[Not Available]	[Not Available]	[Not Available]	[Not Available]	[Not Available]	[Not Available]	[Not Available]	[Not Available]	[Not Available]	[Not Available]	4	No	1966	2000	68	[Discrepancy]	Alive	1	Other	[Not Available]	[Not Available]
TCGA-64-5779	2005-02-11	Lung Adenocarcinoma	NO	YES	Male	Lung	WHITE	NOT HISPANIC OR LATINO	[Not Available]	No	L-Lower	Central Lung	2009	[Not Available]	[Not Available]	R0	6th	T2	N2	M0	Stage IIIA	[Not Applicable]	[Not Applicable]	[Not Applicable]	[Not Applicable]	YES	100	[Not Available]	94	[Not Available]	100	[Not Available]	[Not Available]	[Not Available]	[Not Available]	[Not Available]	[Not Available]	[Not Available]	4	No	1969	2009	40	[Not Available]	Alive	0	Post-Adjuvant Therapy	[Not Available]	[Not Available]
TCGA-64-5781	2005-03-11	Lung Adenocarcinoma	NO	YES	Female	Lung	WHITE	NOT HISPANIC OR LATINO	[Not Available]	No	R-Upper	Central Lung	2007	[Not Available]	[Not Available]	R0	6th	T2	N0	M0	Stage IB	[Not Applicable]	[Not Applicable]	[Not Applicable]	[Not Applicable]	YES	77	[Not Available]	61	[Not Available]	73	[Not Available]	[Not Available]	[Not Available]	[Not Available]	[Not Available]	[Not Available]	[Not Available]	4	No	1982	2007	25	[Not Available]	Alive	0	Post-Adjuvant Therapy	[Not Available]	[Not Available]
TCGA-64-5815	2005-02-11	Lung Adenocarcinoma	NO	YES	Male	Lung	WHITE	NOT HISPANIC OR LATINO	[Not Available]	No	R-Upper	Central Lung	2009	[Not Available]	[Not Available]	R0	6th	T2	N1	M0	Stage IIB	[Not Applicable]	[Not Applicable]	[Not Applicable]	[Not Applicable]	YES	89	[Not Available]	76	[Not Available]	87	YES	[Not Available]	[Not Available]	YES	[Not Available]	[Not Available]	[Not Available]	3	No	[Not Available]	1985	30	[Not Available]	Alive	[Not Available]	[Not Available]	[Not Available]	[Not Available]
TCGA-67-3770	2010-12-00	Lung Adenocarcinoma	YES	NO	Female	Lung	WHITE	NOT HISPANIC OR LATINO	[Not Available]	No	R-Upper	Central Lung	2009	[Not Available]	[Not Available]	R0	[Not Available]	T1	N0	M0	Stage IA	[Not Applicable]	[Not Applicable]	[Not Applicable]	[Not Applicable]	[Not Available]	[Not Available]	[Not Available]	[Not Available]	[Not Available]	[Not Available]	NO	[Not Available]	[Not Available]	NO	[Not Available]	NO	[Not Available]	3	No	[Not Available]	[Not Available]	[Not Available]	[Not Available]	Alive	[Not Available]	[Not Available]	[Not Available]	[Not Available]
TCGA-67-3771	1/21/11	Lung Adenocarcinoma	YES	NO	Female	Lung	BLACK OR AFRICAN AMERICAN	NOT HISPANIC OR LATINO	[Not Available]	No	L-Upper	Central Lung	2009	[Not Available]	[Not Available]	R0	6th	T1	N0	M0	Stage IA	[Not Applicable]	[Not Applicable]	[Not Applicable]	[Not Applicable]	[Not Available]	[Not Available]	[Not Available]	[Not Available]	[Not Available]	[Not Available]	NO	[Not Available]	[Not Available]	NO	[Not Available]	NO	[Not Available]	4	No	[Not Available]	[Not Available]	[Not Available]	[Not Available]	Alive	[Not Available]	[Not Available]	[Not Available]	[Not Available]
TCGA-67-3772	2003-03-11	Lung Adenocarcinoma	YES	NO	Female	Lung	WHITE	NOT HISPANIC OR LATINO	[Not Available]	No	R-Upper	[Not Available]	2009	[Not Available]	[Not Available]	[Not Available]	6th	T2	N0	M0	Stage IB	[Not Applicable]	[Not Applicable]	[Not Applicable]	[Not Applicable]	[Not Available]	[Not Available]	[Not Available]	[Not Available]	[Not Available]	[Not Available]	NO	[Not Available]	[Not Available]	NO	[Not Available]	NO	[Not Available]	1	No	[Not Available]	[Not Available]	[Not Available]	[Not Available]	Alive	[Not Available]	[Not Available]	[Not Available]	[Not Available]
TCGA-67-3773	1/21/11	Lung Adenocarcinoma	YES	NO	Female	Lung	WHITE	NOT HISPANIC OR LATINO	[Not Available]	No	L-Lower	Central Lung	2009	[Not Available]	[Not Available]	R0	6th	T2	N0	M0	Stage IB	[Not Applicable]	[Not Applicable]	[Not Applicable]	[Not Applicable]	[Not Available]	[Not Available]	[Not Available]	[Not Available]	[Not Available]	[Not Available]	NO	[Not Available]	[Not Available]	NO	[Not Available]	NO	[Not Available]	3	No	[Not Available]	[Not Available]	[Not Available]	[Not Available]	Alive	[Not Available]	[Not Available]	[Not Available]	[Not Available]
TCGA-67-3774	2003-03-11	Lung Adenocarcinoma	YES	NO	Female	Lung	WHITE	NOT HISPANIC OR LATINO	[Not Available]	No	L-Lower	[Not Available]	2009	[Not Available]	[Not Available]	RX	6th	T2	N0	M0	Stage IB	[Not Applicable]	[Not Applicable]	[Not Applicable]	[Not Applicable]	[Not Available]	[Not Available]	[Not Available]	[Not Available]	[Not Available]	[Not Available]	NO	[Not Available]	[Not Available]	NO	[Not Available]	NO	[Not Available]	3	No	[Not Available]	[Not Available]	[Not Available]	[Not Available]	Alive	[Not Available]	[Not Available]	[Not Available]	[Not Available]
TCGA-67-3776	1/21/11	Lung Adenocarcinoma	YES	NO	Female	Lung	WHITE	NOT HISPANIC OR LATINO	[Not Available]	No	R-Lower	Central Lung	2009	[Not Available]	[Not Available]	R0	[Not Available]	T2	N1	M0	Stage IIB	[Not Applicable]	[Not Applicable]	[Not Applicable]	[Not Applicable]	[Not Available]	[Not Available]	[Not Available]	[Not Available]	[Not Available]	[Not Available]	NO	[Not Available]	[Not Available]	NO	[Not Available]	NO	[Not Available]	3	No	[Not Available]	[Not Available]	[Not Available]	[Not Available]	Alive	[Not Available]	[Not Available]	[Not Available]	[Not Available]
TCGA-67-4679	1/21/11	Lung Adenocarcinoma	YES	NO	Male	Lung	WHITE	NOT HISPANIC OR LATINO	[Not Available]	No	R-Lower	Central Lung	2009	[Not Available]	[Not Available]	R0	[Not Available]	T3	N0	M0	[Discrepancy]	[Not Applicable]	[Not Applicable]	[Not Applicable]	[Not Applicable]	[Not Available]	[Not Available]	[Not Available]	[Not Available]	[Not Available]	[Not Available]	NO	[Not Available]	[Not Available]	NO	[Not Available]	NO	[Not Available]	4	No	[Not Available]	[Not Available]	[Not Available]	[Not Available]	Alive	[Not Available]	[Not Available]	[Not Available]	[Not Available]
TCGA-67-6215	2006-02-11	Lung Adenocarcinoma	YES	NO	Female	Lung	WHITE	NOT HISPANIC OR LATINO	[Not Available]	No	R-Lower	Central Lung	2010	[Not Available]	[Not Available]	R0	7th	T2a	N0	M0	Stage IB	[Not Applicable]	[Not Applicable]	[Not Applicable]	[Not Applicable]	[Not Available]	[Not Available]	[Not Available]	[Not Available]	[Not Available]	[Not Available]	NO	[Not Available]	[Not Available]	NO	[Not Available]	NO	[Not Available]	1	No	[Not Available]	[Not Available]	[Not Available]	[Not Available]	Alive	2	Post-Adjuvant Therapy	[Not Available]	[Not Available]
TCGA-67-6216	2006-03-11	Lung Adenocarcinoma	YES	NO	Female	Lung	WHITE	NOT HISPANIC OR LATINO	[Not Available]	No	R-Middle	Central Lung	2010	[Not Available]	[Not Available]	R0	7th	T1a	N0	M0	Stage IA	[Not Applicable]	[Not Applicable]	[Not Applicable]	[Not Applicable]	[Not Available]	[Not Available]	[Not Available]	[Not Available]	[Not Available]	[Not Available]	NO	[Not Available]	[Not Available]	NO	[Not Available]	NO	[Not Available]	1	No	[Not Available]	[Not Available]	[Not Available]	[Not Available]	Alive	[Not Available]	[Not Available]	[Not Available]	[Not Available]
TCGA-67-6217	2006-06-11	Lung Adenocarcinoma	YES	NO	Female	Lung	WHITE	NOT HISPANIC OR LATINO	[Not Available]	Yes	L-Upper	Central Lung	2010	[Not Available]	[Not Available]	R0	7th	T2a	N1	M0	Stage IIA	[Not Applicable]	[Not Applicable]	[Not Applicable]	[Not Applicable]	[Not Available]	[Not Available]	[Not Available]	[Not Available]	[Not Available]	[Not Available]	YES	NO	[Not Available]	YES	L858R	YES	RT-PCR	3	No	[Not Available]	1965	[Not Available]	[Not Available]	Alive	[Not Available]	[Not Available]	[Not Available]	[Not Available]
TCGA-69-7760	1/24/12	Lung Adenocarcinoma	YES	NO	Male	Lung	WHITE	NOT HISPANIC OR LATINO	[Not Available]	No	R-Lower	Peripheral Lung	2011	[Not Available]	[Not Available]	[Not Available]	7th	T3	N0	M0	Stage IIB	[Not Applicable]	[Not Applicable]	[Not Applicable]	[Not Applicable]	YES	83	[Not Available]	91	[Not Available]	125	NO	[Not Available]	[Not Available]	YES	[Not Available]	NO	[Not Available]	1	No	[Not Available]	[Not Available]	[Not Available]	[Not Available]	Alive	[Not Available]	[Not Available]	[Not Available]	[Not Available]
TCGA-69-7761	3/13/12	Lung Adenocarcinoma	NO	YES	Male	Lung	WHITE	NOT HISPANIC OR LATINO	[Not Available]	No	L-Lower	Peripheral Lung	2011	[Not Available]	[Not Available]	[Not Available]	7th	T2a	N0	MX	Stage IB	[Not Applicable]	[Not Applicable]	[Not Applicable]	[Not Applicable]	YES	98	[Not Available]	91	[Not Available]	80	[Not Available]	[Not Available]	[Not Available]	YES	Other	[Not Available]	[Not Available]	3	No	1955	1975	20	[Not Available]	Alive	1	Other	[Not Available]	[Not Available]
TCGA-69-7763	1/25/12	Lung Adenocarcinoma	NO	YES	Male	Lung	WHITE	NOT HISPANIC OR LATINO	[Not Available]	No	R-Middle	Peripheral Lung	2010	[Not Available]	[Not Available]	[Not Available]	7th	T1b	N0	M0	Stage IA	[Not Applicable]	[Not Applicable]	[Not Applicable]	[Not Applicable]	YES	89	[Not Available]	93	[Not Available]	72	NO	[Not Available]	[Not Available]	NO	[Not Available]	NO	[Not Available]	4	No	1959	2004	7.5	[Not Available]	Alive	1	Other	[Not Available]	[Not Available]
TCGA-69-7764	1/26/12	Lung Adenocarcinoma	NO	YES	Male	Lung	WHITE	NOT HISPANIC OR LATINO	[Not Available]	No	R-Upper	Peripheral Lung	2010	[Not Available]	[Not Available]	[Not Available]	7th	T1b	N0	M0	Stage IA	[Not Applicable]	[Not Applicable]	[Not Applicable]	[Not Applicable]	YES	106	[Not Available]	94	[Not Available]	[Not Available]	NO	[Not Available]	[Not Available]	YES	[Not Available]	NO	[Not Available]	3	No	1977	1991	30	[Not Available]	Alive	0	Other	[Not Available]	[Not Available]
TCGA-69-7765	1/27/12	Lung Adenocarcinoma	YES	NO	Male	Lung	BLACK OR AFRICAN AMERICAN	NOT HISPANIC OR LATINO	[Not Available]	No	R-Upper	Peripheral Lung	2011	[Not Available]	[Not Available]	[Not Available]	7th	T4	N0	MX	[Discrepancy]	[Not Applicable]	[Not Applicable]	[Not Applicable]	[Not Applicable]	YES	84	[Not Available]	86	[Not Available]	45	NO	[Not Available]	[Not Available]	NO	Other	NO	[Not Available]	4	No	1981	2011	[Not Available]	[Not Available]	Alive	[Not Available]	[Not Available]	[Not Available]	[Not Available]
TCGA-69-7973	2004-02-12	Lung Adenocarcinoma	NO	YES	Female	Lung	WHITE	NOT HISPANIC OR LATINO	[Not Available]	No	R-Middle	Central Lung	2011	[Not Available]	[Not Available]	[Not Available]	7th	T2a	N0	M0	Stage IB	[Not Applicable]	[Not Applicable]	[Not Applicable]	[Not Applicable]	NO	[Not Available]	[Not Available]	[Not Available]	[Not Available]	[Not Available]	[Not Available]	[Not Available]	[Not Available]	YES	[Not Available]	[Not Available]	[Not Available]	4	No	[Not Available]	2011	25	[Not Available]	Alive	1	Pre-Adjuvant Therapy	[Not Available]	[Not Available]
TCGA-69-7974	2004-09-12	Lung Adenocarcinoma	NO	YES	Female	Lung	WHITE	NOT HISPANIC OR LATINO	[Not Available]	No	L-Upper	Peripheral Lung	2011	[Not Available]	[Not Available]	[Not Available]	7th	T2a	N2	MX	Stage IIIA	[Not Applicable]	[Not Applicable]	[Not Applicable]	[Not Applicable]	YES	47	[Not Available]	58	[Not Available]	[Not Available]	[Not Available]	[Not Available]	[Not Available]	YES	Other	[Not Available]	[Not Available]	4	No	1981	2011	30	80	Alive	[Not Available]	Post-Adjuvant Therapy	[Not Available]	[Not Available]
TCGA-69-7978	2004-09-12	Lung Adenocarcinoma	NO	YES	Male	Lung	WHITE	NOT HISPANIC OR LATINO	[Not Available]	No	R-Upper	Peripheral Lung	2011	[Not Available]	[Not Available]	[Not Available]	7th	T2b	N1	MX	Stage IIB	[Not Applicable]	[Not Applicable]	[Not Applicable]	[Not Applicable]	YES	67	75	88	91	[Not Available]	[Not Available]	[Not Available]	[Not Available]	YES	Other	[Not Available]	[Not Available]	2	No	[Not Available]	[Not Available]	80	[Not Available]	Alive	[Not Available]	[Not Available]	[Not Available]	[Not Available]
TCGA-69-7979	2004-09-12	Lung Adenocarcinoma	NO	YES	Female	Lung	WHITE	NOT HISPANIC OR LATINO	[Not Available]	No	R-Upper	[Not Available]	2011	[Not Available]	[Not Available]	[Not Available]	7th	T2a	N0	MX	Stage IB	[Not Applicable]	[Not Applicable]	[Not Applicable]	[Not Applicable]	YES	59	64	70	71	[Not Available]	NO	[Not Available]	[Not Available]	NO	[Not Available]	NO	[Not Available]	2	No	1955	[Not Available]	28	[Not Available]	Alive	[Not Available]	[Not Available]	[Not Available]	[Not Available]
TCGA-69-7980	2004-09-12	Lung Adenocarcinoma	YES	NO	Female	Lung	WHITE	NOT HISPANIC OR LATINO	[Not Available]	No	R-Upper	[Not Available]	2011	[Not Available]	[Not Available]	[Not Available]	7th	T1b	N0	M0	Stage I	[Not Applicable]	[Not Applicable]	[Not Applicable]	[Not Applicable]	YES	92	[Not Available]	86	[Not Available]	71	NO	[Not Available]	[Not Available]	YES	Other	NO	[Not Available]	4	No	[Not Available]	2001	80	[Not Available]	Alive	[Not Available]	[Not Available]	[Not Available]	[Not Available]
TCGA-69-8253	2006-01-12	Lung Adenocarcinoma	YES	NO	Female	Lung	BLACK OR AFRICAN AMERICAN	NOT HISPANIC OR LATINO	[Not Available]	No	R-Lower	[Not Available]	2012	[Not Available]	[Not Available]	[Not Available]	7th	T1a	N1	MX	Stage IIA	[Not Applicable]	[Not Applicable]	[Not Applicable]	[Not Applicable]	YES	87	[Not Available]	[Not Available]	[Not Available]	[Not Available]	NO	[Not Available]	[Not Available]	NO	[Not Available]	NO	[Not Available]	4	No	1972	2011	7.8	[Not Available]	Alive	2	Pre-Adjuvant Therapy	NO	[Not Available]
TCGA-69-8254	2006-04-12	Lung Adenocarcinoma	YES	NO	Male	Lung	WHITE	NOT HISPANIC OR LATINO	[Not Available]	No	R-Lower	[Not Available]	2012	[Not Available]	[Not Available]	[Not Available]	7th	T2b	[Not Available]	[Not Available]	[Not Available]	[Not Applicable]	[Not Applicable]	[Not Applicable]	[Not Applicable]	YES	62	[Not Available]	[Not Available]	[Not Available]	[Not Available]	NO	[Not Available]	[Not Available]	YES	Other	NO	[Not Available]	3	No	[Not Available]	1989	40	80	Alive	[Not Available]	Other	NO	[Not Available]
TCGA-69-8255	2006-04-12	Lung Adenocarcinoma	YES	NO	Male	Lung	WHITE	HISPANIC OR LATINO	[Not Available]	No	R-Upper	[Not Available]	2011	[Not Available]	[Not Available]	[Not Available]	7th	T1a	N0	M0	Stage IA	[Not Applicable]	[Not Applicable]	[Not Applicable]	[Not Applicable]	YES	57	60	[Not Available]	[Not Available]	60	NO	[Not Available]	[Not Available]	YES	Other	NO	[Not Available]	2	No	1971	[Not Available]	40	[Not Available]	Alive	[Not Available]	[Not Available]	NO	[Not Available]
TCGA-69-8453	12/21/12	Lung Adenocarcinoma	YES	NO	Male	Lung	WHITE	NOT HISPANIC OR LATINO	[Not Available]	No	R-Lower	Peripheral Lung	2012	[Not Available]	[Not Available]	[Not Available]	7th	T3	N0	MX	Stage IIB	[Not Applicable]	[Not Applicable]	[Not Applicable]	[Not Applicable]	YES	85	85	86	87	52	[Not Available]	[Not Available]	[Not Available]	[Not Available]	[Not Available]	[Not Available]	[Not Available]	3	No	[Not Available]	1974	12	[Not Available]	Alive	1	Preoperative	NO	[Not Available]
TCGA-69-A59K	2/18/13	Lung Adenocarcinoma	YES	NO	Female	Lung	BLACK OR AFRICAN AMERICAN	NOT HISPANIC OR LATINO	[Not Available]	No	R-Upper	[Not Available]	2012	[Not Available]	[Not Available]	[Not Available]	7th	T3	N0	M0	Stage IIB	[Not Applicable]	[Not Applicable]	[Not Applicable]	[Not Applicable]	YES	118	120	[Not Available]	[Not Available]	75	[Not Available]	[Not Available]	[Not Available]	YES	[Not Available]	NO	[Not Available]	4	No	1999	2012	25	[Not Available]	Alive	2	Pre-Adjuvant Therapy	NO	[Not Available]
TCGA-71-6725	2008-09-11	Lung Adenocarcinoma	YES	NO	Female	Lung	ASIAN	NOT HISPANIC OR LATINO	[Not Available]	No	R-Upper	[Not Available]	2011	[Not Available]	[Not Available]	RX	6th	T2	N0	M0	Stage IB	[Not Applicable]	[Not Applicable]	[Not Applicable]	[Not Applicable]	[Not Available]	[Not Available]	[Not Available]	[Not Available]	[Not Available]	[Not Available]	[Not Available]	[Not Available]	[Not Available]	[Not Available]	[Not Available]	[Not Available]	[Not Available]	2	No	[Not Available]	[Not Available]	[Not Available]	60	Alive	[Not Available]	[Not Available]	[Not Available]	[Not Available]
TCGA-71-8520	4/15/13	Lung Adenocarcinoma	YES	NO	Female	Lung	ASIAN	NOT HISPANIC OR LATINO	[Not Available]	No	L-Upper	[Not Available]	2011	[Not Available]	[Not Available]	R0	7th	T2	N0	M0	Stage IB	[Not Applicable]	[Not Applicable]	[Not Applicable]	[Not Applicable]	NO	[Not Available]	[Not Available]	[Not Available]	[Not Available]	[Not Available]	YES	NO	[Not Available]	[Not Available]	[Not Available]	[Not Available]	[Not Available]	1	No	[Not Available]	[Not Available]	[Not Available]	40	Dead	[Not Available]	Preoperative	NO	[Not Available]
TCGA-73-4658	6/15/11	Lung Adenocarcinoma	NO	YES	Female	Lung	WHITE	NOT HISPANIC OR LATINO	[Not Available]	Yes	L-Lower	Central Lung	2004	[Not Available]	[Not Available]	R0	6th	T2	N0	M0	Stage IB	[Not Applicable]	[Not Applicable]	[Not Applicable]	[Not Applicable]	[Not Available]	[Not Available]	[Not Available]	[Not Available]	[Not Available]	[Not Available]	NO	[Not Available]	[Not Available]	NO	[Not Available]	[Not Available]	[Not Available]	3	No	[Not Available]	[Not Available]	25	[Not Available]	Dead	[Not Available]	[Not Available]	[Not Available]	[Not Available]
TCGA-73-4659	2001-03-11	Lung Adenocarcinoma	NO	YES	Male	Lung	WHITE	NOT HISPANIC OR LATINO	[Not Available]	No	R-Upper	Central Lung	2006	[Not Available]	[Not Available]	R0	6th	T2	N2	M0	Stage IIIA	[Not Applicable]	[Not Applicable]	[Not Applicable]	[Not Applicable]	[Not Available]	[Not Available]	[Not Available]	[Not Available]	[Not Available]	[Not Available]	NO	[Not Available]	[Not Available]	NO	[Not Available]	NO	[Not Available]	3	No	1974	1986	12	90	Dead	0	Other	[Not Available]	[Not Available]
TCGA-73-4662	2001-06-11	Lung Adenocarcinoma	NO	YES	Female	Lung	WHITE	NOT HISPANIC OR LATINO	[Not Available]	No	L-Upper	Peripheral Lung	2007	[Not Available]	[Not Available]	R0	6th	T1	N0	M0	Stage IA	[Not Applicable]	[Not Applicable]	[Not Applicable]	[Not Applicable]	YES	111	[Not Available]	115	[Not Available]	116	NO	[Not Available]	[Not Available]	NO	[Not Available]	NO	[Not Available]	3	No	1955	1972	10	100	Alive	0	Preoperative	[Not Available]	[Not Available]
TCGA-73-4666	2001-06-11	Lung Adenocarcinoma	NO	YES	Female	Lung	WHITE	NOT HISPANIC OR LATINO	[Not Available]	No	R-Upper	Central Lung	2009	[Not Available]	[Not Available]	R0	[Not Available]	T1	N0	M1	Stage IV	[Not Applicable]	[Not Applicable]	[Not Applicable]	[Not Applicable]	[Not Available]	[Not Available]	[Not Available]	[Not Available]	[Not Available]	[Not Available]	NO	[Not Available]	[Not Available]	NO	[Not Available]	NO	[Not Available]	4	No	1982	2002	10	100	Alive	0	Preoperative	[Not Available]	[Not Available]
TCGA-73-4668	2001-06-11	Lung Adenocarcinoma	NO	YES	Female	Lung	AMERICAN INDIAN OR ALASKA NATIVE	NOT HISPANIC OR LATINO	[Not Available]	No	L-Upper	Peripheral Lung	2009	[Not Available]	[Not Available]	R0	[Not Available]	T2	N1	M0	Stage IIB	[Not Applicable]	[Not Applicable]	[Not Applicable]	[Not Applicable]	[Not Available]	[Not Available]	[Not Available]	[Not Available]	[Not Available]	[Not Available]	NO	[Not Available]	[Not Available]	NO	[Not Available]	NO	[Not Available]	4	No	1968	2005	55	100	Alive	0	Preoperative	[Not Available]	[Not Available]
TCGA-73-4670	2001-06-11	Lung Adenocarcinoma	NO	YES	Female	Lung	WHITE	NOT HISPANIC OR LATINO	[Not Available]	No	L-Upper	Peripheral Lung	2010	[Not Available]	[Not Available]	R0	[Not Available]	T2	N0	M1	Stage IV	[Not Applicable]	[Not Applicable]	[Not Applicable]	[Not Applicable]	[Not Available]	[Not Available]	[Not Available]	[Not Available]	[Not Available]	[Not Available]	NO	[Not Available]	[Not Available]	NO	[Not Available]	NO	[Not Available]	4	[Discrepancy]	1979	2009	30	[Not Available]	Alive	[Not Available]	[Not Available]	[Not Available]	[Not Available]
TCGA-73-4675	2001-07-11	Lung Adenocarcinoma	NO	YES	Male	Lung	WHITE	NOT HISPANIC OR LATINO	[Not Available]	No	L-Lower	Peripheral Lung	2010	[Not Available]	[Not Available]	RX	7th	T3	N1	M0	Stage IIIA	[Not Applicable]	[Not Applicable]	[Not Applicable]	[Not Applicable]	YES	66	[Not Available]	55	[Not Available]	69	NO	[Not Available]	[Not Available]	NO	[Not Available]	NO	[Not Available]	4	No	1969	2010	41	[Not Available]	Dead	0	Pre-Adjuvant Therapy	[Not Available]	[Not Available]
TCGA-73-4676	5/18/11	Lung Adenocarcinoma	NO	YES	Male	Lung	WHITE	NOT HISPANIC OR LATINO	[Not Available]	No	R-Upper	Peripheral Lung	2010	[Not Available]	[Not Available]	R0	7th	T2a	N1	M0	Stage IIA	[Not Applicable]	[Not Applicable]	[Not Applicable]	[Not Applicable]	YES	78	[Not Available]	67	[Not Available]	86	NO	[Not Available]	[Not Available]	NO	[Not Available]	NO	[Not Available]	4	Yes	1977	2009	48	70	Dead	1	Preoperative	[Not Available]	[Not Available]
TCGA-73-4677	2001-07-11	Lung Adenocarcinoma	NO	YES	Male	Lung	WHITE	NOT HISPANIC OR LATINO	[Not Available]	No	R-Upper	Peripheral Lung	2010	[Not Available]	[Not Available]	R0	[Not Available]	T2a	N0	M0	[Discrepancy]	[Not Applicable]	[Not Applicable]	[Not Applicable]	[Not Applicable]	[Not Available]	[Not Available]	[Not Available]	[Not Available]	[Not Available]	[Not Available]	NO	[Not Available]	[Not Available]	NO	[Not Available]	NO	[Not Available]	3	No	[Not Available]	1985	[Not Available]	[Not Available]	Dead	[Not Available]	Other	[Not Available]	[Not Available]
TCGA-73-7498	5/31/12	Lung Adenocarcinoma	NO	YES	Female	Lung	WHITE	NOT HISPANIC OR LATINO	[Not Available]	Yes, History of Synchronous/Bilateral Malignancy	R-Lower	Peripheral Lung	2010	[Not Available]	[Not Available]	R0	7th	T1b	N0	M0	Stage IA	[Not Applicable]	[Not Applicable]	[Not Applicable]	[Not Applicable]	YES	61.2	60.1	91.9	89.6	74	NO	[Not Available]	[Not Available]	NO	[Not Available]	NO	[Not Available]	4	No	1969	1997	28	80	Alive	1	Preoperative	NO	[Not Available]
TCGA-73-7499	5/31/12	Lung Adenocarcinoma	NO	YES	Female	Lung	WHITE	NOT HISPANIC OR LATINO	[Not Available]	No	R-Upper	Peripheral Lung	2010	[Not Available]	[Not Available]	R0	7th	T2a	N0	M0	Stage IB	[Not Applicable]	[Not Applicable]	[Not Applicable]	[Not Applicable]	YES	91.5	[Not Available]	103.7	[Not Available]	54	NO	[Not Available]	[Not Available]	NO	[Not Available]	NO	[Not Available]	1	No	[Not Available]	[Not Available]	[Not Available]	90	Dead	0	Other	NO	[Not Available]
TCGA-73-A9RS	6/17/14	Lung Adenocarcinoma	NO	YES	Male	Lung	BLACK OR AFRICAN AMERICAN	NOT HISPANIC OR LATINO	[Not Available]	No	R-Upper	Peripheral Lung	2013	[Not Available]	[Not Available]	R0	7th	T3	N0	M0	Stage IIB	[Not Applicable]	[Not Applicable]	[Not Applicable]	[Not Applicable]	YES	59.6	60.2	81.5	81.9	[Not Available]	YES	NO	[Not Available]	YES	[Not Available]	YES	FISH	2	No	1990	[Not Available]	11	80	Dead	1	Preoperative	YES	[Not Available]
TCGA-75-5122	3/28/11	Lung Adenocarcinoma	NO	YES	Male	Lung	[Not Available]	[Not Available]	[Not Available]	No	L-Upper	Peripheral Lung	2005	[Not Available]	[Not Available]	R0	[Not Available]	T2	N0	M0	Stage IB	[Not Applicable]	[Not Applicable]	[Not Applicable]	[Not Applicable]	[Not Available]	[Not Available]	[Not Available]	[Not Available]	[Not Available]	[Not Available]	NO	[Not Available]	[Not Available]	NO	[Not Available]	NO	[Not Available]	3	No	[Not Available]	1985	20	0	Dead	[Not Available]	Other	[Not Available]	[Not Available]
TCGA-75-5125	3/31/11	Lung Adenocarcinoma	NO	YES	Male	Lung	[Not Available]	[Not Available]	[Not Available]	No	R-Upper	Peripheral Lung	[Not Available]	[Not Available]	[Not Available]	R0	6th	T2	N1	M0	Stage IIB	[Not Applicable]	[Not Applicable]	[Not Applicable]	[Not Applicable]	[Not Available]	[Not Available]	[Not Available]	[Not Available]	[Not Available]	[Not Available]	NO	[Not Available]	[Not Available]	NO	[Not Available]	NO	[Not Available]	3	No	[Not Available]	1987	25	[Not Available]	Dead	[Not Available]	Other	[Not Available]	[Not Available]
TCGA-75-5126	3/31/11	Lung Adenocarcinoma	NO	YES	Female	Lung	[Not Available]	[Not Available]	[Not Available]	No	L-Upper	Peripheral Lung	2007	[Not Available]	[Not Available]	R2	[Not Available]	T3	N2	M0	Stage IIIA	[Not Applicable]	[Not Applicable]	[Not Applicable]	[Not Applicable]	[Not Available]	[Not Available]	[Not Available]	[Not Available]	[Not Available]	[Not Available]	NO	[Not Available]	[Not Available]	NO	[Not Available]	NO	[Not Available]	4	No	[Not Available]	2007	40	[Not Available]	Alive	1	Other	[Not Available]	[Not Available]
TCGA-75-5146	2004-06-11	Lung Adenocarcinoma	NO	YES	Male	Lung	[Not Available]	[Not Available]	[Not Available]	No	R-Lower	Peripheral Lung	[Not Available]	[Not Available]	[Not Available]	R0	6th	T2	N0	M0	Stage IB	[Not Applicable]	[Not Applicable]	[Not Applicable]	[Not Applicable]	[Not Available]	[Not Available]	[Not Available]	[Not Available]	[Not Available]	[Not Available]	NO	[Not Available]	[Not Available]	NO	[Not Available]	NO	[Not Available]	3	No	[Not Available]	1987	[Not Available]	[Not Available]	Alive	[Not Available]	Other	[Not Available]	[Not Available]
TCGA-75-5147	2004-06-11	Lung Adenocarcinoma	NO	YES	Female	Lung	[Not Available]	[Not Available]	[Not Available]	No	R-Upper	Peripheral Lung	[Not Available]	[Not Available]	[Not Available]	R0	6th	T2	N0	M0	Stage IB	[Not Applicable]	[Not Applicable]	[Not Applicable]	[Not Applicable]	[Not Available]	[Not Available]	[Not Available]	[Not Available]	[Not Available]	[Not Available]	NO	[Not Available]	[Not Available]	NO	[Not Available]	NO	[Not Available]	1	No	[Not Available]	[Not Available]	[Not Available]	[Not Available]	Alive	[Not Available]	Other	[Not Available]	[Not Available]
TCGA-75-6203	8/15/11	Lung Adenocarcinoma	NO	YES	Female	Lung	[Not Available]	[Not Available]	[Not Available]	No	L-Lower	[Not Available]	2008	[Not Available]	[Not Available]	R0	6th	T2	N2	M0	Stage IIIA	[Not Applicable]	[Not Applicable]	[Not Applicable]	[Not Applicable]	[Not Available]	[Not Available]	[Not Available]	[Not Available]	[Not Available]	[Not Available]	[Not Available]	[Not Available]	[Not Available]	[Not Available]	[Not Available]	[Not Available]	[Not Available]	1	No	[Not Available]	[Not Available]	[Not Available]	[Not Available]	Alive	[Not Available]	[Not Available]	[Not Available]	[Not Available]
TCGA-75-6205	7/21/11	Lung Adenocarcinoma	NO	YES	Female	Lung	[Not Available]	[Not Available]	[Not Available]	No	L-Upper	Peripheral Lung	2006	[Not Available]	[Not Available]	R0	7th	T2a	N0	M0	Stage IB	[Not Applicable]	[Not Applicable]	[Not Applicable]	[Not Applicable]	[Not Available]	[Not Available]	[Not Available]	[Not Available]	[Not Available]	[Not Available]	[Not Available]	[Not Available]	[Not Available]	[Not Available]	[Not Available]	[Not Available]	[Not Available]	1	No	[Not Available]	[Not Available]	[Not Available]	[Not Available]	Dead	[Not Available]	[Not Available]	[Not Available]	[Not Available]
TCGA-75-6206	7/21/11	Lung Adenocarcinoma	NO	YES	Male	Lung	[Not Available]	[Not Available]	[Not Available]	No	R-Upper	Peripheral Lung	[Not Available]	[Not Available]	[Not Available]	R0	6th	T2	N0	M0	Stage IB	[Not Applicable]	[Not Applicable]	[Not Applicable]	[Not Applicable]	[Not Available]	[Not Available]	[Not Available]	[Not Available]	[Not Available]	[Not Available]	[Not Available]	[Not Available]	[Not Available]	[Not Available]	[Not Available]	[Not Available]	[Not Available]	3	No	[Not Available]	1962	20	[Not Available]	Alive	[Not Available]	[Not Available]	[Not Available]	[Not Available]
TCGA-75-6207	7/21/11	Lung Adenocarcinoma	NO	YES	Male	Lung	[Not Available]	[Not Available]	[Not Available]	No	R-Upper	Peripheral Lung	2007	[Not Available]	[Not Available]	R0	6th	T2	N2	M0	Stage IIIA	[Not Applicable]	[Not Applicable]	[Not Applicable]	[Not Applicable]	[Not Available]	[Not Available]	[Not Available]	[Not Available]	[Not Available]	[Not Available]	[Not Available]	[Not Available]	[Not Available]	[Not Available]	[Not Available]	[Not Available]	[Not Available]	3	No	[Not Available]	1972	10	[Not Available]	Dead	[Not Available]	[Not Available]	[Not Available]	[Not Available]
TCGA-75-6211	7/21/11	Lung Adenocarcinoma	NO	YES	Female	Lung	[Not Available]	[Not Available]	[Not Available]	No	[Discrepancy]	[Not Available]	2009	[Not Available]	[Not Available]	R0	6th	T2	N0	M0	Stage IB	[Not Applicable]	[Not Applicable]	[Not Applicable]	[Not Applicable]	[Not Available]	[Not Available]	[Not Available]	[Not Available]	[Not Available]	[Not Available]	[Not Available]	[Not Available]	[Not Available]	[Not Available]	[Not Available]	[Not Available]	[Not Available]	2	No	[Not Available]	[Not Available]	34	[Not Available]	Dead	[Not Available]	Preoperative	[Not Available]	[Not Available]
TCGA-75-6212	7/21/11	Lung Adenocarcinoma	NO	YES	Female	Lung	[Not Available]	[Not Available]	[Not Available]	No	L-Lower	Peripheral Lung	[Not Available]	[Not Available]	[Not Available]	R0	6th	T2	N1	M0	Stage IIB	[Not Applicable]	[Not Applicable]	[Not Applicable]	[Not Applicable]	[Not Available]	[Not Available]	[Not Available]	[Not Available]	[Not Available]	[Not Available]	[Not Available]	[Not Available]	[Not Available]	[Not Available]	[Not Available]	[Not Available]	[Not Available]	1	No	[Not Available]	[Not Available]	[Not Available]	[Not Available]	Dead	[Not Available]	[Not Available]	[Not Available]	[Not Available]
TCGA-75-6214	2008-12-11	Lung Adenocarcinoma	NO	YES	Female	Lung	[Not Available]	[Not Available]	[Not Available]	No	R-Upper	Peripheral Lung	[Not Available]	[Not Available]	[Not Available]	R0	6th	T2	N2	M0	Stage IIIA	[Not Applicable]	[Not Applicable]	[Not Applicable]	[Not Applicable]	[Not Available]	[Not Available]	[Not Available]	[Not Available]	[Not Available]	[Not Available]	[Not Available]	[Not Available]	[Not Available]	[Not Available]	[Not Available]	[Not Available]	[Not Available]	2	No	1970	[Not Available]	40	[Not Available]	Dead	1	Preoperative	[Not Available]	[Not Available]
TCGA-75-7025	2008-11-11	Lung Adenocarcinoma	NO	YES	Male	Lung	[Not Available]	[Not Available]	[Not Available]	No	L-Lower	Peripheral Lung	[Not Available]	[Not Available]	[Not Available]	R0	6th	T2	N0	M0	Stage IB	[Not Applicable]	[Not Applicable]	[Not Applicable]	[Not Applicable]	[Not Available]	[Not Available]	[Not Available]	[Not Available]	[Not Available]	[Not Available]	[Not Available]	[Not Available]	[Not Available]	[Not Available]	[Not Available]	[Not Available]	[Not Available]	3	No	1967	1986	[Not Available]	[Not Available]	Alive	0	Preoperative	[Not Available]	[Not Available]
TCGA-75-7027	2008-12-11	Lung Adenocarcinoma	NO	YES	Male	Lung	[Not Available]	[Not Available]	[Not Available]	No	L-Lower	Peripheral Lung	[Not Available]	[Not Available]	[Not Available]	R0	6th	T2	N0	M0	Stage IB	[Not Applicable]	[Not Applicable]	[Not Applicable]	[Not Applicable]	[Not Available]	[Not Available]	[Not Available]	[Not Available]	[Not Available]	[Not Available]	[Not Available]	[Not Available]	[Not Available]	[Not Available]	[Not Available]	[Not Available]	[Not Available]	2	No	1956	[Not Available]	50	[Not Available]	Alive	0	Preoperative	[Not Available]	[Not Available]
TCGA-75-7030	8/16/11	Lung Adenocarcinoma	NO	YES	Male	Lung	[Not Available]	[Not Available]	[Not Available]	No	R-Lower	Peripheral Lung	2007	[Not Available]	[Not Available]	R0	6th	T3	N0	M0	Stage IIB	[Not Applicable]	[Not Applicable]	[Not Applicable]	[Not Applicable]	[Not Available]	[Not Available]	[Not Available]	[Not Available]	[Not Available]	[Not Available]	[Not Available]	[Not Available]	[Not Available]	[Not Available]	[Not Available]	[Not Available]	[Not Available]	1	No	[Not Available]	[Not Available]	[Not Available]	[Not Available]	Alive	0	Preoperative	[Not Available]	[Not Available]
TCGA-75-7031	8/16/11	Lung Adenocarcinoma	NO	YES	Female	Lung	[Not Available]	[Not Available]	[Not Available]	No	R-Upper	Peripheral Lung	2008	[Not Available]	[Not Available]	R0	6th	T2	N0	M0	Stage IB	[Not Applicable]	[Not Applicable]	[Not Applicable]	[Not Applicable]	[Not Available]	[Not Available]	[Not Available]	[Not Available]	[Not Available]	[Not Available]	[Not Available]	[Not Available]	[Not Available]	[Not Available]	[Not Available]	[Not Available]	[Not Available]	3	No	1965	1975	5	[Not Available]	Alive	0	Preoperative	[Not Available]	[Not Available]
TCGA-78-7143	9/23/11	Lung Adenocarcinoma	NO	YES	Female	Lung	WHITE	[Not Available]	[Not Available]	No	L-Upper	Central Lung	1992	[Not Available]	[Not Available]	R0	6th	T2	N0	M0	Stage IB	[Not Applicable]	[Not Applicable]	[Not Applicable]	[Not Applicable]	[Not Available]	[Not Available]	[Not Available]	[Not Available]	[Not Available]	[Not Available]	NO	[Not Available]	[Not Available]	NO	[Not Available]	NO	[Not Available]	1	No	[Not Available]	[Not Available]	[Not Available]	[Not Available]	Dead	0	Preoperative	[Not Available]	[Not Available]
TCGA-78-7145	9/23/11	Lung Adenocarcinoma	NO	YES	Female	Lung	WHITE	[Not Available]	[Not Available]	No	R-Middle	Peripheral Lung	2000	[Not Available]	[Not Available]	R1	6th	T4	N1	M1	Stage IV	[Not Applicable]	[Not Applicable]	[Not Applicable]	[Not Applicable]	[Not Available]	[Not Available]	[Not Available]	[Not Available]	[Not Available]	[Not Available]	NO	[Not Available]	[Not Available]	NO	[Not Available]	NO	[Not Available]	4	No	1973	1998	25	[Not Available]	Dead	1	Preoperative	[Not Available]	[Not Available]
TCGA-78-7146	9/28/11	Lung Adenocarcinoma	NO	YES	Female	Lung	WHITE	[Not Available]	[Not Available]	No	L-Lower	Peripheral Lung	1999	[Not Available]	[Not Available]	R0	6th	T2	N2	M0	Stage IIIA	[Not Applicable]	[Not Applicable]	[Not Applicable]	[Not Applicable]	[Not Available]	[Not Available]	[Not Available]	[Not Available]	[Not Available]	[Not Available]	NO	[Not Available]	[Not Available]	NO	[Not Available]	NO	[Not Available]	4	No	1988	1998	6	[Not Available]	Dead	1	Preoperative	[Not Available]	[Not Available]
TCGA-78-7147	9/28/11	Lung Adenocarcinoma	NO	YES	Female	Lung	WHITE	[Not Available]	[Not Available]	No	R-Upper	Peripheral Lung	2001	[Not Available]	[Not Available]	R0	6th	T2	N1	M0	Stage IIB	[Not Applicable]	[Not Applicable]	[Not Applicable]	[Not Applicable]	[Not Available]	[Not Available]	[Not Available]	[Not Available]	[Not Available]	[Not Available]	NO	[Not Available]	[Not Available]	NO	[Not Available]	NO	[Not Available]	2	No	1950	[Not Available]	50	[Not Available]	Dead	1	Preoperative	[Not Available]	[Not Available]
TCGA-78-7148	2010-04-11	Lung Adenocarcinoma	NO	YES	Male	Lung	WHITE	[Not Available]	[Not Available]	No	L-Upper	Peripheral Lung	2001	[Not Available]	[Not Available]	R0	6th	T2	N1	M0	Stage IIB	[Not Applicable]	[Not Applicable]	[Not Applicable]	[Not Applicable]	[Not Available]	[Not Available]	[Not Available]	[Not Available]	[Not Available]	[Not Available]	NO	[Not Available]	[Not Available]	NO	[Not Available]	NO	[Not Available]	2	No	1944	[Not Available]	57	[Not Available]	Dead	0	Preoperative	[Not Available]	[Not Available]
TCGA-78-7149	2010-03-11	Lung Adenocarcinoma	NO	YES	Male	Lung	WHITE	[Not Available]	[Not Available]	No	R-Lower	Central Lung	2002	[Not Available]	[Not Available]	R0	6th	T4	N0	M0	Stage IIIB	[Not Applicable]	[Not Applicable]	[Not Applicable]	[Not Applicable]	NO	[Not Available]	[Not Available]	[Not Available]	[Not Available]	[Not Available]	NO	[Not Available]	[Not Available]	NO	[Not Available]	NO	[Not Available]	2	No	1950	[Not Available]	115	[Not Available]	Alive	1	Preoperative	[Not Available]	[Not Available]
TCGA-78-7150	9/28/11	Lung Adenocarcinoma	NO	YES	Male	Lung	WHITE	[Not Available]	[Not Available]	No	L-Lower	Central Lung	2002	[Not Available]	[Not Available]	R0	6th	T2	N1	M0	Stage IIB	[Not Applicable]	[Not Applicable]	[Not Applicable]	[Not Applicable]	[Not Available]	[Not Available]	[Not Available]	[Not Available]	[Not Available]	[Not Available]	NO	[Not Available]	[Not Available]	NO	[Not Available]	NO	[Not Available]	4	No	1963	2000	37	[Not Available]	Dead	0	Preoperative	[Not Available]	[Not Available]
TCGA-78-7152	9/29/11	Lung Adenocarcinoma	NO	YES	Male	Lung	WHITE	[Not Available]	[Not Available]	No	R-Upper	Peripheral Lung	2003	[Not Available]	[Not Available]	R0	6th	T2	N0	M0	Stage IB	[Not Applicable]	[Not Applicable]	[Not Applicable]	[Not Applicable]	NO	[Not Available]	[Not Available]	[Not Available]	[Not Available]	[Not Available]	NO	[Not Available]	[Not Available]	NO	[Not Available]	NO	[Not Available]	4	No	1959	1999	40	[Not Available]	Dead	1	Preoperative	[Not Available]	[Not Available]
TCGA-78-7153	9/29/11	Lung Adenocarcinoma	NO	YES	Female	Lung	WHITE	[Not Available]	[Not Available]	No	R-Upper	Peripheral Lung	2003	[Not Available]	[Not Available]	R0	6th	T2	N0	M0	Stage IB	[Not Applicable]	[Not Applicable]	[Not Applicable]	[Not Applicable]	NO	[Not Available]	[Not Available]	[Not Available]	[Not Available]	[Not Available]	NO	[Not Available]	[Not Available]	NO	[Not Available]	NO	[Not Available]	4	No	1948	1988	20	[Not Available]	Alive	0	Preoperative	[Not Available]	[Not Available]
TCGA-78-7154	9/27/11	Lung Adenocarcinoma	NO	YES	Male	Lung	WHITE	[Not Available]	[Not Available]	No	L-Upper	Peripheral Lung	2003	[Not Available]	[Not Available]	R0	6th	T3	N2	M0	Stage IIIA	[Not Applicable]	[Not Applicable]	[Not Applicable]	[Not Applicable]	[Not Available]	[Not Available]	[Not Available]	[Not Available]	[Not Available]	[Not Available]	NO	[Not Available]	[Not Available]	NO	[Not Available]	NO	[Not Available]	4	No	1948	1993	112.5	[Not Available]	Dead	1	Preoperative	[Not Available]	[Not Available]
TCGA-78-7155	9/28/11	Lung Adenocarcinoma	NO	YES	Male	Lung	WHITE	[Not Available]	[Not Available]	No	L-Upper	Peripheral Lung	2005	[Not Available]	[Not Available]	R0	6th	T2	N0	M0	Stage IB	[Not Applicable]	[Not Applicable]	[Not Applicable]	[Not Applicable]	[Not Available]	[Not Available]	[Not Available]	[Not Available]	[Not Available]	[Not Available]	NO	[Not Available]	[Not Available]	NO	[Not Available]	NO	[Not Available]	4	No	1957	2005	48	[Not Available]	Dead	0	Preoperative	[Not Available]	[Not Available]
TCGA-78-7156	9/29/11	Lung Adenocarcinoma	NO	YES	Male	Lung	WHITE	[Not Available]	[Not Available]	No	[Not Available]	Peripheral Lung	2006	[Not Available]	[Not Available]	R0	6th	T4	N1	M1	Stage IV	[Not Applicable]	[Not Applicable]	[Not Applicable]	[Not Applicable]	[Not Available]	[Not Available]	[Not Available]	[Not Available]	[Not Available]	[Not Available]	NO	[Not Available]	[Not Available]	NO	[Not Available]	NO	[Not Available]	3	No	1961	1989	84	[Not Available]	Dead	1	Preoperative	[Not Available]	[Not Available]
TCGA-78-7158	9/15/11	Lung Adenocarcinoma	NO	YES	Female	Lung	WHITE	[Not Available]	[Not Available]	No	L-Lower	Peripheral Lung	2007	[Not Available]	[Not Available]	R1	6th	T4	N2	M0	Stage IIIB	[Not Applicable]	[Not Applicable]	[Not Applicable]	[Not Applicable]	[Not Available]	[Not Available]	[Not Available]	[Not Available]	[Not Available]	[Not Available]	NO	[Not Available]	[Not Available]	NO	[Not Available]	NO	[Not Available]	4	No	1963	2005	14	[Not Available]	Dead	1	Preoperative	[Not Available]	[Not Available]
TCGA-78-7159	9/27/11	Lung Adenocarcinoma	NO	YES	Female	Lung	WHITE	[Not Available]	[Not Available]	No	L-Upper	Peripheral Lung	2008	[Not Available]	[Not Available]	R0	6th	T1	NX	M0	Stage IA	[Not Applicable]	[Not Applicable]	[Not Applicable]	[Not Applicable]	[Not Available]	[Not Available]	[Not Available]	[Not Available]	[Not Available]	[Not Available]	NO	[Not Available]	[Not Available]	NO	[Not Available]	NO	[Not Available]	4	No	1965	2007	21	[Not Available]	Alive	1	Preoperative	[Not Available]	[Not Available]
TCGA-78-7160	9/29/11	Lung Adenocarcinoma	NO	YES	Male	Lung	WHITE	[Not Available]	[Not Available]	No	R-Lower	Central Lung	2008	[Not Available]	[Not Available]	R0	6th	T4	N2	M1	Stage IV	[Not Applicable]	[Not Applicable]	[Not Applicable]	[Not Applicable]	NO	[Not Available]	[Not Available]	[Not Available]	[Not Available]	[Not Available]	NO	[Not Available]	[Not Available]	NO	[Not Available]	NO	[Not Available]	4	No	1963	1998	43.8	[Not Available]	Dead	1	Preoperative	[Not Available]	[Not Available]
TCGA-78-7161	10/27/11	Lung Adenocarcinoma	NO	YES	Female	Lung	WHITE	[Not Available]	[Not Available]	No	L-Upper	Peripheral Lung	2011	[Not Available]	[Not Available]	R1	7th	T3	N0	M0	Stage IIB	[Not Applicable]	[Not Applicable]	[Not Applicable]	[Not Applicable]	NO	[Not Available]	[Not Available]	[Not Available]	[Not Available]	[Not Available]	NO	[Not Available]	[Not Available]	YES	[Not Available]	NO	[Not Available]	4	No	1961	1998	27.8	[Not Available]	Dead	1	Preoperative	[Not Available]	[Not Available]
TCGA-78-7162	2010-03-11	Lung Adenocarcinoma	NO	YES	Male	Lung	WHITE	[Not Available]	[Not Available]	No	L-Upper	Peripheral Lung	1991	[Not Available]	[Not Available]	R0	6th	T1	N0	M0	Stage IA	[Not Applicable]	[Not Applicable]	[Not Applicable]	[Not Applicable]	[Not Available]	[Not Available]	[Not Available]	[Not Available]	[Not Available]	[Not Available]	NO	[Not Available]	[Not Available]	NO	[Not Available]	NO	[Not Available]	2	No	1940	[Not Available]	12	[Not Available]	Dead	0	Preoperative	[Not Available]	[Not Available]
TCGA-78-7163	9/26/11	Lung Adenocarcinoma	NO	YES	Male	Lung	WHITE	[Not Available]	[Not Available]	No	R-Lower	Peripheral Lung	1992	[Not Available]	[Not Available]	R0	6th	T2	N0	M0	Stage IB	[Not Applicable]	[Not Applicable]	[Not Applicable]	[Not Applicable]	NO	[Not Available]	[Not Available]	[Not Available]	[Not Available]	[Not Available]	NO	[Not Available]	[Not Available]	NO	[Not Available]	NO	[Not Available]	4	No	1950	1991	41	[Not Available]	Alive	1	Preoperative	[Not Available]	[Not Available]
TCGA-78-7166	9/28/11	Lung Adenocarcinoma	NO	YES	Male	Lung	WHITE	[Not Available]	[Not Available]	Yes	L-Lower	Central Lung	2002	[Not Available]	[Not Available]	R0	6th	T2	N1	M0	Stage IIB	[Not Applicable]	[Not Applicable]	[Not Applicable]	[Not Applicable]	[Not Available]	[Not Available]	[Not Available]	[Not Available]	[Not Available]	[Not Available]	NO	[Not Available]	[Not Available]	NO	[Not Available]	NO	[Not Available]	3	No	1934	1972	38	[Not Available]	Dead	2	Preoperative	[Not Available]	[Not Available]
TCGA-78-7167	2010-04-11	Lung Adenocarcinoma	NO	YES	Male	Lung	WHITE	[Not Available]	[Not Available]	No	[Not Available]	Peripheral Lung	2002	[Not Available]	[Not Available]	R0	6th	T2	N0	M1	Stage IV	[Not Applicable]	[Not Applicable]	[Not Applicable]	[Not Applicable]	[Not Available]	[Not Available]	[Not Available]	[Not Available]	[Not Available]	[Not Available]	NO	[Not Available]	[Not Available]	NO	[Not Available]	NO	[Not Available]	2	No	1937	[Not Available]	64	[Not Available]	Dead	1	Preoperative	[Not Available]	[Not Available]
TCGA-78-7220	2012-08-11	Lung Adenocarcinoma	NO	YES	Female	Lung	WHITE	[Not Available]	[Not Available]	No	L-Upper	Peripheral Lung	2000	[Not Available]	[Not Available]	R0	6th	T2	N2	M0	Stage IIIA	[Not Applicable]	[Not Applicable]	[Not Applicable]	[Not Applicable]	[Not Available]	[Not Available]	[Not Available]	[Not Available]	[Not Available]	[Not Available]	NO	[Not Available]	[Not Available]	NO	[Not Available]	NO	[Not Available]	2	No	1965	[Not Available]	35	[Not Available]	Dead	0	Preoperative	[Not Available]	[Not Available]
TCGA-78-7535	1/19/12	Lung Adenocarcinoma	NO	YES	Male	Lung	WHITE	[Not Available]	[Not Available]	No	L-Upper	[Not Available]	2000	[Not Available]	[Not Available]	R0	6th	T2	N0	M0	Stage IB	[Not Applicable]	[Not Applicable]	[Not Applicable]	[Not Applicable]	[Not Available]	[Not Available]	[Not Available]	[Not Available]	[Not Available]	[Not Available]	NO	[Not Available]	[Not Available]	NO	[Not Available]	NO	[Not Available]	2	No	1972	[Not Available]	35	[Not Available]	Dead	0	Preoperative	[Not Available]	[Not Available]
TCGA-78-7536	1/19/12	Lung Adenocarcinoma	NO	YES	Male	Lung	WHITE	[Not Available]	[Not Available]	No	R-Upper	[Not Available]	2001	[Not Available]	[Not Available]	R0	6th	T2	N2	M0	Stage IIIA	[Not Applicable]	[Not Applicable]	[Not Applicable]	[Not Applicable]	[Not Available]	[Not Available]	[Not Available]	[Not Available]	[Not Available]	[Not Available]	NO	[Not Available]	[Not Available]	NO	[Not Available]	NO	[Not Available]	4	No	1949	1993	44	[Not Available]	Dead	0	Preoperative	[Not Available]	[Not Available]
TCGA-78-7537	1/13/12	Lung Adenocarcinoma	YES	NO	Male	Lung	[Not Available]	[Not Available]	[Not Available]	No	R-Upper	[Not Available]	2002	[Not Available]	[Not Available]	R0	6th	T2	N0	M0	Stage IB	[Not Applicable]	[Not Applicable]	[Not Applicable]	[Not Applicable]	[Not Available]	[Not Available]	[Not Available]	[Not Available]	[Not Available]	[Not Available]	NO	[Not Available]	[Not Available]	NO	[Not Available]	NO	[Not Available]	3	No	1944	1984	20	[Not Available]	Dead	1	Preoperative	[Not Available]	[Not Available]
TCGA-78-7539	1/19/12	Lung Adenocarcinoma	NO	YES	Female	Lung	WHITE	[Not Available]	[Not Available]	No	R-Upper	[Not Available]	2011	[Not Available]	[Not Available]	R0	7th	T2b	N0	M0	Stage IIA	[Not Applicable]	[Not Applicable]	[Not Applicable]	[Not Applicable]	NO	[Not Available]	[Not Available]	[Not Available]	[Not Available]	[Not Available]	NO	[Not Available]	[Not Available]	NO	[Not Available]	NO	[Not Available]	3	No	1953	1981	2.2	[Not Available]	Alive	1	Preoperative	[Not Available]	[Not Available]
TCGA-78-7540	1/18/12	Lung Adenocarcinoma	NO	YES	Female	Lung	WHITE	[Not Available]	[Not Available]	No	L-Lower	[Not Available]	1999	[Not Available]	[Not Available]	R0	6th	T2	N0	M0	Stage IB	[Not Applicable]	[Not Applicable]	[Not Applicable]	[Not Applicable]	[Not Available]	[Not Available]	[Not Available]	[Not Available]	[Not Available]	[Not Available]	NO	[Not Available]	[Not Available]	NO	[Not Available]	NO	[Not Available]	1	No	[Not Available]	[Not Available]	[Not Available]	[Not Available]	Dead	0	Preoperative	[Not Available]	[Not Available]
TCGA-78-7542	1/13/12	Lung Adenocarcinoma	NO	YES	Male	Lung	WHITE	[Not Available]	[Not Available]	No	R-Upper	[Not Available]	1993	[Not Available]	[Not Available]	R0	6th	T2	N0	M0	Stage IB	[Not Applicable]	[Not Applicable]	[Not Applicable]	[Not Applicable]	[Not Available]	[Not Available]	[Not Available]	[Not Available]	[Not Available]	[Not Available]	NO	[Not Available]	[Not Available]	NO	[Not Available]	NO	[Not Available]	2	No	1952	[Not Available]	60	[Not Available]	Dead	0	Preoperative	[Not Available]	[Not Available]
TCGA-78-7633	1/31/12	Lung Adenocarcinoma	NO	YES	Male	Lung	WHITE	[Not Available]	[Not Available]	Yes	L-Upper	[Not Available]	2009	[Not Available]	[Not Available]	R0	6th	T2	N0	M0	Stage IB	[Not Applicable]	[Not Applicable]	[Not Applicable]	[Not Applicable]	YES	100	[Not Available]	[Not Available]	[Not Available]	57	NO	[Not Available]	[Not Available]	NO	[Not Available]	NO	[Not Available]	4	No	1955	2002	94	[Not Available]	Dead	0	Preoperative	[Not Available]	[Not Available]
TCGA-78-8640	10/23/12	Lung Adenocarcinoma	NO	YES	Male	Lung	[Not Available]	[Not Available]	[Not Available]	No	L-Upper	Peripheral Lung	1994	[Not Available]	[Not Available]	R0	6th	T1	N1	M0	Stage IIA	[Not Applicable]	[Not Applicable]	[Not Applicable]	[Not Applicable]	YES	66	[Not Available]	73	[Not Available]	[Not Available]	NO	[Not Available]	[Not Available]	NO	[Not Available]	NO	[Not Available]	2	No	1949	[Not Available]	45	[Not Available]	Alive	0	Preoperative	NO	[Not Available]
TCGA-78-8648	10/23/12	Lung Adenocarcinoma	NO	YES	Female	Lung	[Not Available]	[Not Available]	[Not Available]	No	R-Upper	Peripheral Lung	2002	[Not Available]	[Not Available]	R0	6th	T3	N0	M0	Stage IIB	[Not Applicable]	[Not Applicable]	[Not Applicable]	[Not Applicable]	YES	70	[Not Available]	83	[Not Available]	69	NO	[Not Available]	[Not Available]	NO	[Not Available]	NO	[Not Available]	2	No	1971	[Not Available]	45	[Not Available]	Dead	2	Preoperative	NO	[Not Available]
TCGA-78-8655	10/23/12	Lung Adenocarcinoma	NO	YES	Female	Lung	[Not Available]	[Not Available]	[Not Available]	No	L-Lower	Peripheral Lung	2003	[Not Available]	[Not Available]	R0	6th	T1	N0	M0	Stage IA	[Not Applicable]	[Not Applicable]	[Not Applicable]	[Not Applicable]	YES	128	[Not Available]	70	[Not Available]	93	NO	[Not Available]	[Not Available]	NO	[Not Available]	NO	[Not Available]	4	No	1981	2001	10	[Not Available]	Alive	0	Preoperative	NO	[Not Available]
TCGA-78-8660	10/23/12	Lung Adenocarcinoma	NO	YES	Male	Lung	[Not Available]	[Not Available]	[Not Available]	Yes, History of Prior Malignancy	R-Lower	Peripheral Lung	2005	[Not Available]	[Not Available]	R0	6th	T2	N1	M0	Stage IIB	[Not Applicable]	[Not Applicable]	[Not Applicable]	[Not Applicable]	YES	108	[Not Available]	72	[Not Available]	87	NO	[Not Available]	[Not Available]	NO	[Not Available]	NO	[Not Available]	4	No	1954	2005	11	[Not Available]	Dead	1	Preoperative	YES	[Not Available]
TCGA-78-8662	10/23/12	Lung Adenocarcinoma	NO	YES	Female	Lung	[Not Available]	[Not Available]	[Not Available]	No	R-Upper	Peripheral Lung	2000	[Not Available]	[Not Available]	R0	6th	T2	N0	M0	Stage IB	[Not Applicable]	[Not Applicable]	[Not Applicable]	[Not Applicable]	YES	96	[Not Available]	64	[Not Available]	76	NO	[Not Available]	[Not Available]	NO	[Not Available]	NO	[Not Available]	2	No	1964	[Not Available]	45	[Not Available]	Dead	0	Preoperative	NO	[Not Available]
TCGA-80-5607	2008-12-11	Lung Adenocarcinoma	NO	YES	Female	Lung	[Not Available]	[Not Available]	[Not Available]	Yes	L-Upper	Peripheral Lung	2007	[Not Available]	[Not Available]	R0	6th	T2	N1	M0	Stage IIB	[Not Applicable]	[Not Applicable]	[Not Applicable]	[Not Applicable]	[Not Available]	[Not Available]	[Not Available]	[Not Available]	[Not Available]	[Not Available]	[Not Available]	[Not Available]	[Not Available]	[Not Available]	[Not Available]	[Not Available]	[Not Available]	3	No	1965	1985	15	[Not Available]	Alive	1	Preoperative	[Not Available]	[Not Available]
TCGA-80-5608	8/15/11	Lung Adenocarcinoma	NO	YES	Female	Lung	[Not Available]	[Not Available]	[Not Available]	No	R-Upper	Peripheral Lung	[Not Available]	[Not Available]	[Not Available]	R0	6th	T1	N0	M0	Stage IA	[Not Applicable]	[Not Applicable]	[Not Applicable]	[Not Applicable]	[Not Available]	[Not Available]	[Not Available]	[Not Available]	[Not Available]	[Not Available]	[Not Available]	[Not Available]	[Not Available]	[Not Available]	[Not Available]	[Not Available]	[Not Available]	2	No	1972	[Not Available]	26	[Not Available]	Alive	1	Preoperative	[Not Available]	[Not Available]
TCGA-80-5611	7/26/11	Lung Adenocarcinoma	NO	YES	Male	Lung	[Not Available]	[Not Available]	[Not Available]	Yes	L-Upper	Peripheral Lung	[Not Available]	[Not Available]	[Not Available]	R0	6th	T2	N0	M0	Stage IB	[Not Applicable]	[Not Applicable]	[Not Applicable]	[Not Applicable]	[Not Available]	[Not Available]	[Not Available]	[Not Available]	[Not Available]	[Not Available]	[Not Available]	[Not Available]	[Not Available]	[Not Available]	[Not Available]	[Not Available]	[Not Available]	4	No	[Not Available]	2008	60	[Not Available]	Alive	0	Preoperative	[Not Available]	[Not Available]
TCGA-83-5908	5/25/11	Lung Adenocarcinoma	YES	NO	Female	Lung	WHITE	NOT HISPANIC OR LATINO	[Not Available]	No	L-Upper	[Not Available]	2009	[Not Available]	[Not Available]	R0	6th	T1	N0	M0	Stage IA	[Not Applicable]	[Not Applicable]	[Not Applicable]	[Not Applicable]	[Not Available]	[Not Available]	[Not Available]	[Not Available]	[Not Available]	[Not Available]	NO	[Not Available]	[Not Available]	NO	[Not Available]	NO	[Not Available]	4	No	1962	2007	69	90	Alive	1	Preoperative	[Not Available]	[Not Available]
TCGA-86-6562	6/21/11	Lung Adenocarcinoma	YES	NO	Male	Lung	WHITE	NOT HISPANIC OR LATINO	[Not Available]	No	R-Upper	Central Lung	2011	[Not Available]	[Not Available]	R0	7th	T2a	N1	M0	Stage IIA	[Not Applicable]	[Not Applicable]	[Not Applicable]	[Not Applicable]	NO	[Not Available]	[Not Available]	[Not Available]	[Not Available]	[Not Available]	NO	[Not Available]	[Not Available]	[Not Available]	[Not Available]	[Not Available]	[Not Available]	1	No	[Not Available]	[Not Available]	[Not Available]	[Not Available]	Dead	[Not Available]	[Not Available]	[Not Available]	[Not Available]
TCGA-86-6851	2010-07-11	Lung Adenocarcinoma	YES	NO	Female	Lung	WHITE	NOT HISPANIC OR LATINO	[Not Available]	No	L-Upper	[Not Available]	2011	[Not Available]	[Not Available]	[Not Available]	7th	T1b	N1	M0	Stage IIA	[Not Applicable]	[Not Applicable]	[Not Applicable]	[Not Applicable]	NO	[Not Available]	[Not Available]	[Not Available]	[Not Available]	[Not Available]	[Not Available]	[Not Available]	[Not Available]	[Not Available]	[Not Available]	[Not Available]	[Not Available]	2	No	1959	[Not Available]	52	[Not Available]	Alive	[Not Available]	[Not Available]	[Not Available]	[Not Available]
TCGA-86-7701	1/18/12	Lung Adenocarcinoma	YES	NO	Male	Lung	WHITE	NOT HISPANIC OR LATINO	[Not Available]	No	R-Upper	Peripheral Lung	2011	[Not Available]	[Not Available]	R0	7th	T2	N0	M1	Stage IV	[Not Applicable]	[Not Applicable]	[Not Applicable]	[Not Applicable]	NO	[Not Available]	[Not Available]	[Not Available]	[Not Available]	[Not Available]	[Not Available]	[Not Available]	[Not Available]	[Not Available]	[Not Available]	[Not Available]	[Not Available]	1	No	[Not Available]	[Not Available]	[Not Available]	80	Alive	2	[Not Available]	[Not Available]	[Not Available]
TCGA-86-7711	2005-02-11	Lung Adenocarcinoma	YES	NO	Male	Lung	WHITE	HISPANIC OR LATINO	[Not Available]	No	R-Lower	Peripheral Lung	2011	[Not Available]	[Not Available]	R0	7th	T2a	N1	M0	Stage IIA	[Not Applicable]	[Not Applicable]	[Not Applicable]	[Not Applicable]	NO	[Not Available]	[Not Available]	[Not Available]	[Not Available]	[Not Available]	NO	[Not Available]	[Not Available]	[Not Available]	[Not Available]	[Not Available]	[Not Available]	2	No	1960	[Not Available]	50	80	Dead	2	[Not Available]	[Not Available]	[Not Available]
TCGA-86-7713	2005-02-11	Lung Adenocarcinoma	YES	NO	Male	Lung	WHITE	NOT HISPANIC OR LATINO	[Not Available]	No	R-Middle	Peripheral Lung	2011	[Not Available]	[Not Available]	R0	7th	T2b	N0	M0	Stage IIA	[Not Applicable]	[Not Applicable]	[Not Applicable]	[Not Applicable]	NO	[Not Available]	[Not Available]	[Not Available]	[Not Available]	[Not Available]	NO	[Not Available]	[Not Available]	[Not Available]	[Not Available]	[Not Available]	[Not Available]	1	No	[Not Available]	[Not Available]	[Not Available]	80	Alive	1	[Not Available]	[Not Available]	[Not Available]
TCGA-86-7714	2007-12-11	Lung Adenocarcinoma	YES	NO	Female	Lung	BLACK OR AFRICAN AMERICAN	NOT HISPANIC OR LATINO	[Not Available]	No	R-Lower	Peripheral Lung	2011	[Not Available]	[Not Available]	R0	7th	T1b	N2	M0	Stage IIIA	[Not Applicable]	[Not Applicable]	[Not Applicable]	[Not Applicable]	NO	[Not Available]	[Not Available]	[Not Available]	[Not Available]	[Not Available]	NO	[Not Available]	[Not Available]	NO	[Not Available]	[Not Available]	[Not Available]	2	No	1968	[Not Available]	43	100	Dead	0	Preoperative	[Not Available]	[Not Available]
TCGA-86-7953	3/14/12	Lung Adenocarcinoma	YES	NO	Female	Lung	WHITE	NOT HISPANIC OR LATINO	[Not Available]	No	L-Upper	Peripheral Lung	2011	[Not Available]	[Not Available]	RX	7th	T1b	N0	M0	Stage IA	[Not Applicable]	[Not Applicable]	[Not Applicable]	[Not Applicable]	NO	[Not Available]	[Not Available]	[Not Available]	[Not Available]	[Not Available]	[Not Available]	[Not Available]	[Not Available]	NO	[Not Available]	[Not Available]	[Not Available]	1	No	[Not Available]	[Not Available]	[Not Available]	[Not Available]	Alive	[Not Available]	[Not Available]	[Not Available]	[Not Available]
TCGA-86-7954	3/30/12	Lung Adenocarcinoma	YES	NO	Female	Lung	WHITE	NOT HISPANIC OR LATINO	[Not Available]	No	R-Lower	Peripheral Lung	2011	[Not Available]	[Not Available]	R0	7th	T2	N0	M0	Stage IB	[Not Applicable]	[Not Applicable]	[Not Applicable]	[Not Applicable]	NO	[Not Available]	[Not Available]	[Not Available]	[Not Available]	[Not Available]	NO	[Not Available]	[Not Available]	NO	[Not Available]	[Not Available]	[Not Available]	3	No	1963	1971	8	100	Alive	0	Preoperative	[Not Available]	[Not Available]
TCGA-86-7955	3/14/12	Lung Adenocarcinoma	YES	NO	Male	Lung	WHITE	NOT HISPANIC OR LATINO	[Not Available]	No	R-Lower	Peripheral Lung	2011	[Not Available]	[Not Available]	RX	7th	T2a	N0	M0	Stage IB	[Not Applicable]	[Not Applicable]	[Not Applicable]	[Not Applicable]	NO	[Not Available]	[Not Available]	[Not Available]	[Not Available]	[Not Available]	NO	[Not Available]	[Not Available]	NO	[Not Available]	[Not Available]	[Not Available]	1	No	[Not Available]	[Not Available]	[Not Available]	90	Alive	1	[Not Available]	[Not Available]	[Not Available]
TCGA-86-8054	2005-02-12	Lung Adenocarcinoma	YES	NO	Male	Lung	WHITE	NOT HISPANIC OR LATINO	[Not Available]	No	R-Upper	Central Lung	2011	[Not Available]	[Not Available]	R0	7th	T2b	N1	M0	Stage IIB	[Not Applicable]	[Not Applicable]	[Not Applicable]	[Not Applicable]	NO	[Not Available]	[Not Available]	[Not Available]	[Not Available]	[Not Available]	NO	[Not Available]	[Not Available]	NO	[Not Available]	NO	[Not Available]	2	No	1994	[Not Available]	9	[Not Available]	Alive	[Not Available]	[Not Available]	[Not Available]	[Not Available]
TCGA-86-8055	2005-09-12	Lung Adenocarcinoma	YES	NO	Male	Lung	WHITE	NOT HISPANIC OR LATINO	[Not Available]	No	L-Upper	Peripheral Lung	2011	[Not Available]	[Not Available]	R0	7th	T2a	N1	M0	Stage IIA	[Not Applicable]	[Not Applicable]	[Not Applicable]	[Not Applicable]	NO	[Not Available]	[Not Available]	[Not Available]	[Not Available]	[Not Available]	NO	[Not Available]	[Not Available]	NO	[Not Available]	[Not Available]	[Not Available]	2	No	1955	[Not Available]	60	80	Dead	2	Preoperative	[Not Available]	[Not Available]
TCGA-86-8056	2005-09-12	Lung Adenocarcinoma	YES	NO	Female	Lung	WHITE	NOT HISPANIC OR LATINO	[Not Available]	No	Other (please specify)	Peripheral Lung	2011	[Not Available]	[Not Available]	R0	7th	T4	N0	M0	Stage IIIA	[Not Applicable]	[Not Applicable]	[Not Applicable]	[Not Applicable]	NO	[Not Available]	[Not Available]	[Not Available]	[Not Available]	[Not Available]	NO	[Not Available]	[Not Available]	NO	[Not Available]	NO	[Not Available]	3	No	1963	1975	36	100	Alive	0	Preoperative	[Not Available]	[Not Available]
TCGA-86-8073	6/13/12	Lung Adenocarcinoma	YES	NO	Male	Lung	WHITE	NOT HISPANIC OR LATINO	[Not Available]	No	L-Upper	Peripheral Lung	2011	[Not Available]	[Not Available]	R0	7th	T2a	N0	M0	Stage IB	[Not Applicable]	[Not Applicable]	[Not Applicable]	[Not Applicable]	NO	[Not Available]	[Not Available]	[Not Available]	[Not Available]	[Not Available]	NO	[Not Available]	[Not Available]	NO	[Not Available]	NO	[Not Available]	2	No	1970	[Not Available]	40	[Not Available]	Alive	[Not Available]	[Not Available]	[Not Available]	[Not Available]
TCGA-86-8074	2005-09-12	Lung Adenocarcinoma	YES	NO	Female	Lung	WHITE	NOT HISPANIC OR LATINO	[Not Available]	No	L-Lower	Peripheral Lung	2011	[Not Available]	[Not Available]	R0	7th	T1b	N1	M0	Stage IIA	[Not Applicable]	[Not Applicable]	[Not Applicable]	[Not Applicable]	NO	[Not Available]	[Not Available]	[Not Available]	[Not Available]	[Not Available]	NO	[Not Available]	[Not Available]	NO	[Not Available]	NO	[Not Available]	2	No	1970	[Not Available]	40	80	Alive	2	[Not Available]	[Not Available]	[Not Available]
TCGA-86-8075	5/16/12	Lung Adenocarcinoma	YES	NO	Female	Lung	WHITE	NOT HISPANIC OR LATINO	[Not Available]	No	L-Upper	Peripheral Lung	2011	[Not Available]	[Not Available]	R0	7th	T2	N0	M0	Stage IB	[Not Applicable]	[Not Applicable]	[Not Applicable]	[Not Applicable]	NO	[Not Available]	[Not Available]	[Not Available]	[Not Available]	[Not Available]	NO	[Not Available]	[Not Available]	NO	[Not Available]	NO	[Not Available]	1	No	[Not Available]	[Not Available]	[Not Available]	80	Dead	2	Preoperative	[Not Available]	[Not Available]
TCGA-86-8076	2005-09-12	Lung Adenocarcinoma	YES	NO	Male	Lung	WHITE	NOT HISPANIC OR LATINO	[Not Available]	No	R-Upper	Peripheral Lung	2011	[Not Available]	[Not Available]	R0	7th	T1	N0	M0	Stage IA	[Not Applicable]	[Not Applicable]	[Not Applicable]	[Not Applicable]	NO	[Not Available]	[Not Available]	[Not Available]	[Not Available]	[Not Available]	NO	[Not Available]	[Not Available]	NO	[Not Available]	NO	[Not Available]	1	No	[Not Available]	[Not Available]	[Not Available]	80	Alive	2	Preoperative	[Not Available]	[Not Available]
TCGA-86-8278	2006-06-12	Lung Adenocarcinoma	YES	NO	Female	Lung	WHITE	NOT HISPANIC OR LATINO	[Not Available]	No	L-Lower	Peripheral Lung	2011	[Not Available]	[Not Available]	R0	7th	T2	N1	M0	Stage IIB	[Not Applicable]	[Not Applicable]	[Not Applicable]	[Not Applicable]	[Not Available]	[Not Available]	[Not Available]	[Not Available]	[Not Available]	[Not Available]	NO	[Not Available]	[Not Available]	[Not Available]	[Not Available]	[Not Available]	[Not Available]	1	No	[Not Available]	[Not Available]	[Not Available]	80	Alive	2	[Not Available]	[Not Available]	[Not Available]
TCGA-86-8279	2006-06-12	Lung Adenocarcinoma	YES	NO	Male	Lung	WHITE	NOT HISPANIC OR LATINO	[Not Available]	No	R-Upper	Peripheral Lung	2011	[Not Available]	[Not Available]	R0	7th	T2a	N1	M0	Stage IIA	[Not Applicable]	[Not Applicable]	[Not Applicable]	[Not Applicable]	NO	[Not Available]	[Not Available]	[Not Available]	[Not Available]	[Not Available]	NO	[Not Available]	[Not Available]	[Not Available]	[Not Available]	[Not Available]	[Not Available]	1	No	[Not Available]	[Not Available]	[Not Available]	80	Alive	2	Preoperative	YES	[Not Available]
TCGA-86-8280	5/30/12	Lung Adenocarcinoma	YES	NO	Female	Lung	WHITE	NOT HISPANIC OR LATINO	[Not Available]	No	L-Lower	Peripheral Lung	2011	[Not Available]	[Not Available]	R0	7th	T2b	N0	M0	Stage IIA	[Not Applicable]	[Not Applicable]	[Not Applicable]	[Not Applicable]	NO	[Not Available]	[Not Available]	[Not Available]	[Not Available]	[Not Available]	NO	[Not Available]	[Not Available]	[Not Available]	[Not Available]	[Not Available]	[Not Available]	1	No	[Not Available]	[Not Available]	[Not Available]	[Not Available]	Alive	[Not Available]	[Not Available]	[Not Available]	[Not Available]
TCGA-86-8281	5/30/12	Lung Adenocarcinoma	YES	NO	Male	Lung	WHITE	NOT HISPANIC OR LATINO	[Not Available]	No	R-Lower	Peripheral Lung	2011	[Not Available]	[Not Available]	[Not Available]	7th	T1	NX	M0	Stage IA	[Not Applicable]	[Not Applicable]	[Not Applicable]	[Not Applicable]	NO	[Not Available]	[Not Available]	[Not Available]	[Not Available]	[Not Available]	NO	[Not Available]	[Not Available]	[Not Available]	[Not Available]	[Not Available]	[Not Available]	3	No	1955	1985	30	100	Alive	0	Preoperative	[Not Available]	[Not Available]
TCGA-86-8358	2007-06-12	Lung Adenocarcinoma	YES	NO	Male	Lung	WHITE	NOT HISPANIC OR LATINO	[Not Available]	No	R-Upper	Peripheral Lung	2012	[Not Available]	[Not Available]	R0	7th	T2a	N0	M0	Stage IB	[Not Applicable]	[Not Applicable]	[Not Applicable]	[Not Applicable]	[Not Available]	[Not Available]	[Not Available]	[Not Available]	[Not Available]	[Not Available]	NO	[Not Available]	[Not Available]	[Not Available]	[Not Available]	[Not Available]	[Not Available]	2	No	1992	[Not Available]	20	90	Alive	2	Preoperative	[Not Available]	[Not Available]
TCGA-86-8359	7/17/12	Lung Adenocarcinoma	YES	NO	Male	Lung	WHITE	NOT HISPANIC OR LATINO	[Not Available]	No	L-Lower	Peripheral Lung	2012	[Not Available]	[Not Available]	R0	7th	T3	N2	M0	Stage IIIA	[Not Applicable]	[Not Applicable]	[Not Applicable]	[Not Applicable]	NO	[Not Available]	[Not Available]	[Not Available]	[Not Available]	[Not Available]	[Not Available]	[Not Available]	[Not Available]	[Not Available]	[Not Available]	[Not Available]	[Not Available]	2	No	1982	[Not Available]	36	80	Dead	1	Preoperative	[Not Available]	[Not Available]
TCGA-86-8585	8/30/12	Lung Adenocarcinoma	YES	NO	Male	Lung	WHITE	NOT HISPANIC OR LATINO	[Not Available]	No	L-Upper	Peripheral Lung	2012	[Not Available]	[Not Available]	R0	7th	T2a	N0	M0	Stage IB	[Not Applicable]	[Not Applicable]	[Not Applicable]	[Not Applicable]	NO	[Not Available]	[Not Available]	[Not Available]	[Not Available]	[Not Available]	NO	[Not Available]	[Not Available]	NO	[Not Available]	[Not Available]	[Not Available]	1	No	[Not Available]	[Not Available]	[Not Available]	[Not Available]	Alive	[Not Available]	[Not Available]	[Not Available]	[Not Available]
TCGA-86-8668	8/30/12	Lung Adenocarcinoma	YES	NO	Female	Lung	WHITE	NOT HISPANIC OR LATINO	[Not Available]	No	L-Lower	Peripheral Lung	2012	[Not Available]	[Not Available]	R0	7th	T1b	N0	M0	Stage IA	[Not Applicable]	[Not Applicable]	[Not Applicable]	[Not Applicable]	NO	[Not Available]	[Not Available]	[Not Available]	[Not Available]	[Not Available]	NO	[Not Available]	[Not Available]	[Not Available]	[Not Available]	[Not Available]	[Not Available]	1	No	[Not Available]	[Not Available]	[Not Available]	100	Alive	0	Preoperative	[Not Available]	[Not Available]
TCGA-86-8669	8/30/12	Lung Adenocarcinoma	YES	NO	Male	Lung	WHITE	NOT HISPANIC OR LATINO	[Not Available]	No	R-Upper	Peripheral Lung	2012	[Not Available]	[Not Available]	R0	7th	T1b	N0	M0	Stage IA	[Not Applicable]	[Not Applicable]	[Not Applicable]	[Not Applicable]	NO	[Not Available]	[Not Available]	[Not Available]	[Not Available]	[Not Available]	NO	[Not Available]	[Not Available]	[Not Available]	[Not Available]	[Not Available]	[Not Available]	2	No	1965	[Not Available]	47	100	Alive	0	Preoperative	[Not Available]	[Not Available]
TCGA-86-8671	8/30/12	Lung Adenocarcinoma	YES	NO	Female	Lung	WHITE	NOT HISPANIC OR LATINO	[Not Available]	No	R-Upper	Peripheral Lung	2012	[Not Available]	[Not Available]	R0	7th	T2b	N1	M0	Stage IIB	[Not Applicable]	[Not Applicable]	[Not Applicable]	[Not Applicable]	NO	[Not Available]	[Not Available]	[Not Available]	[Not Available]	[Not Available]	[Not Available]	[Not Available]	[Not Available]	[Not Available]	[Not Available]	[Not Available]	[Not Available]	1	No	[Not Available]	[Not Available]	[Not Available]	90	Alive	1	Preoperative	[Not Available]	[Not Available]
TCGA-86-8672	8/31/12	Lung Adenocarcinoma	YES	NO	Male	Lung	WHITE	NOT HISPANIC OR LATINO	[Not Available]	No	R-Upper	Central Lung	2012	[Not Available]	[Not Available]	R0	7th	T3	N0	M0	Stage IIB	[Not Applicable]	[Not Applicable]	[Not Applicable]	[Not Applicable]	NO	[Not Available]	[Not Available]	[Not Available]	[Not Available]	[Not Available]	NO	[Not Available]	[Not Available]	[Not Available]	[Not Available]	[Not Available]	[Not Available]	1	No	[Not Available]	[Not Available]	[Not Available]	[Not Available]	Dead	[Not Available]	[Not Available]	[Not Available]	[Not Available]
TCGA-86-8673	8/30/12	Lung Adenocarcinoma	YES	NO	Male	Lung	WHITE	NOT HISPANIC OR LATINO	[Not Available]	No	L-Upper	[Not Available]	2011	[Not Available]	[Not Available]	R0	7th	T2	N0	M0	Stage IB	[Not Applicable]	[Not Applicable]	[Not Applicable]	[Not Applicable]	NO	[Not Available]	[Not Available]	[Not Available]	[Not Available]	[Not Available]	[Not Available]	[Not Available]	[Not Available]	[Not Available]	[Not Available]	[Not Available]	[Not Available]	2	No	1968	[Not Available]	54	[Not Available]	Alive	[Not Available]	[Not Available]	[Not Available]	[Not Available]
TCGA-86-8674	8/30/12	Lung Adenocarcinoma	YES	NO	Male	Lung	WHITE	NOT HISPANIC OR LATINO	[Not Available]	No	R-Middle	Peripheral Lung	2012	[Not Available]	[Not Available]	R0	7th	T2a	N1	M0	Stage IIA	[Not Applicable]	[Not Applicable]	[Not Applicable]	[Not Applicable]	NO	[Not Available]	[Not Available]	[Not Available]	[Not Available]	[Not Available]	[Not Available]	[Not Available]	[Not Available]	[Not Available]	[Not Available]	[Not Available]	[Not Available]	4	No	1982	2012	37.5	[Not Available]	Alive	[Not Available]	[Not Available]	[Not Available]	[Not Available]
TCGA-86-A456	2012-06-12	Lung Adenocarcinoma	YES	NO	Female	Lung	ASIAN	NOT HISPANIC OR LATINO	[Not Available]	No	L-Upper	Peripheral Lung	2012	[Not Available]	[Not Available]	R0	7th	T1a	N0	M0	Stage IA	[Not Applicable]	[Not Applicable]	[Not Applicable]	[Not Applicable]	NO	[Not Available]	[Not Available]	[Not Available]	[Not Available]	[Not Available]	[Not Available]	[Not Available]	[Not Available]	[Not Available]	[Not Available]	[Not Available]	[Not Available]	4	No	1974	2009	[Not Available]	[Not Available]	Alive	[Not Available]	[Not Available]	[Not Available]	[Not Available]
TCGA-86-A4D0	2012-06-12	Lung Adenocarcinoma	YES	NO	Male	Lung	WHITE	NOT HISPANIC OR LATINO	[Not Available]	No	R-Upper	[Not Available]	2012	[Not Available]	[Not Available]	R0	7th	T2b	N0	M0	Stage IIA	[Not Applicable]	[Not Applicable]	[Not Applicable]	[Not Applicable]	NO	[Not Available]	[Not Available]	[Not Available]	[Not Available]	[Not Available]	NO	[Not Available]	[Not Available]	NO	[Not Available]	NO	[Not Available]	2	No	1983	[Not Available]	[Not Available]	90	Dead	1	Preoperative	[Not Available]	[Not Available]
TCGA-86-A4JF	2/14/13	Lung Adenocarcinoma	YES	NO	Male	Lung	WHITE	NOT HISPANIC OR LATINO	[Not Available]	No	R-Upper	Central Lung	2012	[Not Available]	[Not Available]	R0	7th	T3	N0	M0	Stage IIB	[Not Applicable]	[Not Applicable]	[Not Applicable]	[Not Applicable]	NO	[Not Available]	[Not Available]	[Not Available]	[Not Available]	[Not Available]	NO	[Not Available]	[Not Available]	NO	[Not Available]	NO	[Not Available]	4	No	[Not Available]	2012	[Not Available]	90	Dead	1	Preoperative	[Not Available]	[Not Available]
TCGA-86-A4P7	2002-07-13	Lung Adenocarcinoma	YES	NO	Female	Lung	WHITE	NOT HISPANIC OR LATINO	[Not Available]	No	L-Lower	Peripheral Lung	2012	[Not Available]	[Not Available]	R0	7th	T2a	N0	M0	Stage IB	[Not Applicable]	[Not Applicable]	[Not Applicable]	[Not Applicable]	NO	[Not Available]	[Not Available]	[Not Available]	[Not Available]	[Not Available]	NO	[Not Available]	[Not Available]	NO	[Not Available]	NO	[Not Available]	1	No	[Not Available]	[Not Available]	[Not Available]	100	Alive	0	Preoperative	[Not Available]	[Not Available]
TCGA-86-A4P8	2002-07-13	Lung Adenocarcinoma	YES	NO	Female	Lung	WHITE	NOT HISPANIC OR LATINO	[Not Available]	No	R-Lower	[Not Available]	2012	[Not Available]	[Not Available]	[Not Available]	7th	T1b	N2	MX	Stage IIIA	[Not Applicable]	[Not Applicable]	[Not Applicable]	[Not Applicable]	YES	84	89	74	78	85	NO	[Not Available]	[Not Available]	YES	[Not Available]	YES	FISH	1	No	[Not Available]	[Not Available]	[Not Available]	[Not Available]	Alive	[Not Available]	[Not Available]	[Not Available]	[Not Available]
TCGA-91-6828	7/15/11	Lung Adenocarcinoma	YES	NO	Male	Lung	WHITE	NOT HISPANIC OR LATINO	[Not Available]	No	L-Lower	[Not Available]	2011	[Not Available]	[Not Available]	R0	7th	T1a	N0	M0	Stage IA	[Not Applicable]	[Not Applicable]	[Not Applicable]	[Not Applicable]	YES	81	[Not Available]	[Not Available]	[Not Available]	71	NO	[Not Available]	[Not Available]	[Not Available]	[Not Available]	[Not Available]	[Not Available]	3	No	[Not Available]	1993	[Not Available]	[Not Available]	Alive	2	Preoperative	[Not Available]	[Not Available]
TCGA-91-6829	7/19/11	Lung Adenocarcinoma	NO	YES	Male	Lung	WHITE	NOT HISPANIC OR LATINO	[Not Available]	No	R-Lower	[Not Available]	2001	[Not Available]	[Not Available]	R0	5th	T2	N0	MX	Stage IB	[Not Applicable]	[Not Applicable]	[Not Applicable]	[Not Applicable]	[Not Available]	[Not Available]	[Not Available]	[Not Available]	[Not Available]	[Not Available]	NO	[Not Available]	[Not Available]	[Not Available]	[Not Available]	[Not Available]	[Not Available]	4	No	1940	2003	94.5	[Not Available]	Dead	3	Other	[Not Available]	[Not Available]
TCGA-91-6830	7/19/11	Lung Adenocarcinoma	NO	YES	Female	Lung	WHITE	NOT HISPANIC OR LATINO	[Not Available]	No	L-Upper	[Not Available]	2002	[Not Available]	[Not Available]	[Not Available]	5th	T1	N1	MX	Stage IIA	[Not Applicable]	[Not Applicable]	[Not Applicable]	[Not Applicable]	[Not Available]	[Not Available]	[Not Available]	[Not Available]	[Not Available]	[Not Available]	NO	[Not Available]	[Not Available]	[Not Available]	[Not Available]	[Not Available]	[Not Available]	4	No	1990	2002	12	[Not Available]	Alive	[Not Available]	[Not Available]	[Not Available]	[Not Available]
TCGA-91-6831	7/19/11	Lung Adenocarcinoma	NO	YES	Male	Lung	WHITE	NOT HISPANIC OR LATINO	[Not Available]	No	R-Middle	[Not Available]	2001	[Not Available]	[Not Available]	[Not Available]	5th	T2	N0	MX	Stage IB	[Not Applicable]	[Not Applicable]	[Not Applicable]	[Not Applicable]	NO	[Not Available]	[Not Available]	[Not Available]	[Not Available]	[Not Available]	NO	[Not Available]	[Not Available]	[Not Available]	[Not Available]	[Not Available]	[Not Available]	2	No	[Not Available]	[Not Available]	[Not Available]	[Not Available]	Alive	[Not Available]	[Not Available]	[Not Available]	[Not Available]
TCGA-91-6835	7/20/11	Lung Adenocarcinoma	NO	YES	Female	Lung	WHITE	NOT HISPANIC OR LATINO	[Not Available]	No	R-Lower	[Not Available]	2010	[Not Available]	[Not Available]	R0	7th	T1	N0	M0	Stage IA	[Not Applicable]	[Not Applicable]	[Not Applicable]	[Not Applicable]	YES	75	91	[Not Available]	[Not Available]	78	NO	[Not Available]	[Not Available]	NO	[Not Available]	[Not Available]	[Not Available]	3	No	[Not Available]	1976	25	[Not Available]	Alive	[Not Available]	[Not Available]	[Not Available]	[Not Available]
TCGA-91-6836	7/20/11	Lung Adenocarcinoma	NO	YES	Female	Lung	WHITE	NOT HISPANIC OR LATINO	[Not Available]	Yes	R-Upper	[Not Available]	2010	[Not Available]	[Not Available]	[Not Available]	7th	T2	N0	MX	Stage IB	[Not Applicable]	[Not Applicable]	[Not Applicable]	[Not Applicable]	YES	108	109	[Not Available]	101	97	NO	[Not Available]	[Not Available]	NO	[Not Available]	[Not Available]	[Not Available]	2	No	1973	[Not Available]	50	[Not Available]	Alive	[Not Available]	[Not Available]	[Not Available]	[Not Available]
TCGA-91-6840	7/15/11	Lung Adenocarcinoma	YES	NO	Female	Lung	WHITE	NOT HISPANIC OR LATINO	[Not Available]	No	R-Upper	[Not Available]	2011	[Not Available]	[Not Available]	R0	7th	T1b	N0	M0	Stage IA	[Not Applicable]	[Not Applicable]	[Not Applicable]	[Not Applicable]	NO	[Not Available]	[Not Available]	[Not Available]	[Not Available]	[Not Available]	NO	[Not Available]	[Not Available]	[Not Available]	[Not Available]	[Not Available]	[Not Available]	3	No	1971	1996	50	[Not Available]	Alive	[Not Available]	[Not Available]	[Not Available]	[Not Available]
TCGA-91-6847	7/19/11	Lung Adenocarcinoma	NO	YES	Female	Lung	WHITE	NOT HISPANIC OR LATINO	[Not Available]	No	R-Lower	[Not Available]	2002	[Not Available]	[Not Available]	[Not Available]	5th	T2	N0	MX	Stage IB	[Not Applicable]	[Not Applicable]	[Not Applicable]	[Not Applicable]	[Not Available]	[Not Available]	[Not Available]	[Not Available]	[Not Available]	[Not Available]	NO	[Not Available]	[Not Available]	[Not Available]	[Not Available]	[Not Available]	[Not Available]	3	No	[Not Available]	1967	[Not Available]	[Not Available]	Alive	[Not Available]	[Not Available]	[Not Available]	[Not Available]
TCGA-91-6848	7/19/11	Lung Adenocarcinoma	NO	YES	Male	Lung	WHITE	NOT HISPANIC OR LATINO	[Not Available]	No	L-Upper	[Not Available]	2009	[Not Available]	[Not Available]	[Not Available]	6th	T2	N2	MX	Stage IIIA	[Not Applicable]	[Not Applicable]	[Not Applicable]	[Not Applicable]	[Not Available]	[Not Available]	[Not Available]	[Not Available]	[Not Available]	[Not Available]	YES	NO	[Not Available]	[Not Available]	[Not Available]	[Not Available]	[Not Available]	4	No	[Not Available]	2007	[Not Available]	[Not Available]	Alive	[Not Available]	[Not Available]	[Not Available]	[Not Available]
TCGA-91-6849	7/20/11	Lung Adenocarcinoma	NO	YES	Female	Lung	BLACK OR AFRICAN AMERICAN	NOT HISPANIC OR LATINO	[Not Available]	No	L-Upper	[Not Available]	2009	[Not Available]	[Not Available]	[Not Available]	6th	T2	N2	MX	Stage IIIA	[Not Applicable]	[Not Applicable]	[Not Applicable]	[Not Applicable]	YES	88	86	76	75	66	NO	[Not Available]	[Not Available]	YES	[Not Available]	[Not Available]	[Not Available]	3	No	1946	1976	30	90	Alive	[Not Available]	Preoperative	[Not Available]	[Not Available]
TCGA-91-7771	1/24/12	Lung Adenocarcinoma	YES	NO	Male	Lung	WHITE	NOT HISPANIC OR LATINO	[Not Available]	Yes	R-Upper	[Not Available]	2011	[Not Available]	[Not Available]	[Not Available]	7th	T3	N0	MX	Stage IIB	[Not Applicable]	[Not Applicable]	[Not Applicable]	[Not Applicable]	NO	[Not Available]	[Not Available]	[Not Available]	[Not Available]	[Not Available]	NO	[Not Available]	[Not Available]	NO	[Not Available]	[Not Available]	[Not Available]	4	No	[Not Available]	2011	75	[Not Available]	Alive	[Not Available]	[Not Available]	[Not Available]	[Not Available]
TCGA-91-8496	8/23/12	Lung Adenocarcinoma	YES	NO	Female	Lung	WHITE	NOT HISPANIC OR LATINO	[Not Available]	No	L-Lower	[Not Available]	2011	[Not Available]	[Not Available]	[Not Available]	7th	T2a	NX	MX	Stage IB	[Not Applicable]	[Not Applicable]	[Not Applicable]	[Not Applicable]	NO	[Not Available]	[Not Available]	[Not Available]	[Not Available]	[Not Available]	NO	[Not Available]	[Not Available]	NO	[Not Available]	NO	[Not Available]	1	No	[Not Available]	[Not Available]	[Not Available]	[Not Available]	Alive	0	Preoperative	NO	[Not Available]
TCGA-91-8497	8/20/12	Lung Adenocarcinoma	YES	NO	Female	Lung	WHITE	NOT HISPANIC OR LATINO	[Not Available]	No	R-Upper	[Not Available]	2012	[Not Available]	[Not Available]	[Not Available]	7th	T1a	N0	MX	Stage IA	[Not Applicable]	[Not Applicable]	[Not Applicable]	[Not Applicable]	NO	[Not Available]	[Not Available]	[Not Available]	[Not Available]	[Not Available]	NO	[Not Available]	[Not Available]	[Not Available]	[Not Available]	[Not Available]	[Not Available]	1	No	[Not Available]	[Not Available]	[Not Available]	[Not Available]	Dead	[Not Available]	[Not Available]	NO	[Not Available]
TCGA-91-8499	8/29/12	Lung Adenocarcinoma	YES	NO	Female	Lung	WHITE	NOT HISPANIC OR LATINO	[Not Available]	No	L-Lower	[Not Available]	2011	[Not Available]	[Not Available]	[Not Available]	7th	T1b	N0	MX	Stage IA	[Not Applicable]	[Not Applicable]	[Not Applicable]	[Not Applicable]	YES	[Not Available]	[Not Available]	[Not Available]	49	[Not Available]	NO	[Not Available]	[Not Available]	YES	[Not Available]	[Not Available]	[Not Available]	2	No	1945	[Not Available]	90	[Not Available]	Alive	[Not Available]	[Not Available]	NO	[Not Available]
TCGA-91-A4BC	2002-05-13	Lung Adenocarcinoma	YES	NO	Male	Lung	WHITE	NOT HISPANIC OR LATINO	[Not Available]	Yes, History of Synchronous/Bilateral Malignancy	R-Upper	[Not Available]	2012	[Not Available]	[Not Available]	[Not Available]	7th	T2b	N0	MX	Stage IIA	[Not Applicable]	[Not Applicable]	[Not Applicable]	[Not Applicable]	YES	[Not Available]	69	[Not Available]	[Not Available]	44	NO	[Not Available]	[Not Available]	NO	[Not Available]	[Not Available]	[Not Available]	4	No	1976	2001	30	[Not Available]	Alive	[Not Available]	[Not Available]	[Not Available]	[Not Available]
TCGA-91-A4BD	2002-05-13	Lung Adenocarcinoma	YES	NO	Male	Lung	WHITE	NOT HISPANIC OR LATINO	[Not Available]	No	L-Lower	[Not Available]	2012	[Not Available]	[Not Available]	RX	7th	T1b	N1	MX	Stage IIA	[Not Applicable]	[Not Applicable]	[Not Applicable]	[Not Applicable]	YES	[Not Available]	92	[Not Available]	70	94	NO	[Not Available]	[Not Available]	NO	[Not Available]	[Not Available]	[Not Available]	3	No	[Not Available]	1981	[Not Available]	[Not Available]	Alive	1	Other	NO	[Not Available]
TCGA-93-7347	3/30/12	Lung Adenocarcinoma	YES	NO	Female	Lung	WHITE	NOT HISPANIC OR LATINO	[Not Available]	No	R-Upper	Central Lung	2011	[Not Available]	[Not Available]	R0	7th	T1a	N0	MX	Stage IA	[Not Applicable]	[Not Applicable]	[Not Applicable]	[Not Applicable]	YES	84	84	62	61	70	NO	[Not Available]	[Not Available]	NO	[Not Available]	NO	[Not Available]	3	No	1952	1967	11	[Not Available]	Alive	[Not Available]	[Not Available]	[Not Available]	[Not Available]
TCGA-93-7348	11/14/11	Lung Adenocarcinoma	YES	NO	Female	Lung	WHITE	NOT HISPANIC OR LATINO	[Not Available]	No	R-Upper	Central Lung	2011	[Not Available]	[Not Available]	R0	7th	T1a	N0	MX	Stage IA	[Not Applicable]	[Not Applicable]	[Not Applicable]	[Not Applicable]	[Not Available]	[Not Available]	[Not Available]	[Not Available]	[Not Available]	[Not Available]	NO	[Not Available]	[Not Available]	NO	[Not Available]	NO	[Not Available]	4	No	1957	1999	42	100	Alive	0	Preoperative	[Not Available]	[Not Available]
TCGA-93-8067	5/18/12	Lung Adenocarcinoma	YES	NO	Male	Lung	ASIAN	NOT HISPANIC OR LATINO	[Not Available]	Yes, History of Prior Malignancy	L-Lower	Peripheral Lung	2011	[Not Available]	[Not Available]	RX	7th	T2a	N0	MX	Stage IB	[Not Applicable]	[Not Applicable]	[Not Applicable]	[Not Applicable]	YES	94	103	89	94	47	NO	[Not Available]	[Not Available]	NO	[Not Available]	NO	[Not Available]	4	No	1961	2001	20	80	Alive	2	Preoperative	NO	[Not Available]
TCGA-93-A4JN	2/27/14	Lung Adenocarcinoma	YES	NO	Male	Lung	WHITE	NOT HISPANIC OR LATINO	[Not Available]	No	L-Upper	[Not Available]	2012	[Not Available]	[Not Available]	RX	7th	T2a	N0	M1a	Stage IV	[Not Applicable]	[Not Applicable]	[Not Applicable]	[Not Applicable]	NO	[Not Available]	[Not Available]	[Not Available]	[Not Available]	[Not Available]	YES	NO	[Not Available]	YES	[Not Available]	YES	FISH	3	No	1971	1991	40	90	Alive	1	Preoperative	NO	[Not Available]
TCGA-93-A4JO	2/27/14	Lung Adenocarcinoma	YES	NO	Male	Lung	WHITE	NOT HISPANIC OR LATINO	[Not Available]	No	R-Lower	[Not Available]	2012	[Not Available]	[Not Available]	RX	7th	T1a	N0	MX	Stage IA	[Not Applicable]	[Not Applicable]	[Not Applicable]	[Not Applicable]	YES	98	97	125	126	81	NO	[Not Available]	[Not Available]	NO	[Not Available]	NO	[Not Available]	4	No	1956	2006	50	90	Dead	1	Preoperative	NO	[Not Available]
TCGA-93-A4JP	2/27/14	Lung Adenocarcinoma	YES	NO	Male	Lung	ASIAN	NOT HISPANIC OR LATINO	[Not Available]	No	R-Lower	[Not Available]	2012	[Not Available]	[Not Available]	RX	7th	TX	NX	M1b	Stage IV	[Not Applicable]	[Not Applicable]	[Not Applicable]	[Not Applicable]	NO	[Not Available]	[Not Available]	[Not Available]	[Not Available]	[Not Available]	NO	[Not Available]	[Not Available]	YES	L861Q	NO	[Not Available]	1	No	[Not Available]	[Not Available]	[Not Available]	[Not Available]	Alive	0	Preoperative	NO	[Not Available]
TCGA-93-A4JQ	2/27/14	Lung Adenocarcinoma	YES	NO	Male	Lung	WHITE	NOT HISPANIC OR LATINO	[Not Available]	Yes, History of Prior Malignancy	R-Upper	[Not Available]	2012	[Not Available]	[Not Available]	RX	7th	T1b	N0	MX	Stage IA	[Not Applicable]	[Not Applicable]	[Not Applicable]	[Not Applicable]	YES	93	100	94	97	83	NO	[Not Available]	[Not Available]	NO	[Not Available]	NO	[Not Available]	3	No	1973	1993	[Not Available]	[Not Available]	Alive	0	Preoperative	NO	[Not Available]
TCGA-95-7039	2011-8-00	Lung Adenocarcinoma	YES	NO	Female	Lung	WHITE	NOT HISPANIC OR LATINO	[Not Available]	No	R-Upper	[Not Available]	2011	[Not Available]	[Not Available]	[Not Available]	7th	T3	N0	MX	Stage IIB	[Not Applicable]	[Not Applicable]	[Not Applicable]	[Not Applicable]	[Not Available]	[Not Available]	[Not Available]	[Not Available]	[Not Available]	[Not Available]	[Not Available]	[Not Available]	[Not Available]	[Not Available]	[Not Available]	[Not Available]	[Not Available]	2	No	[Not Available]	[Not Available]	34	[Not Available]	Alive	1	Preoperative	[Not Available]	[Not Available]
TCGA-95-7043	2011-8-00	Lung Adenocarcinoma	YES	NO	Female	Lung	WHITE	NOT HISPANIC OR LATINO	[Not Available]	Yes	R-Upper	[Not Available]	2011	[Not Available]	[Not Available]	[Not Available]	7th	T1a	N0	MX	Stage IA	[Not Applicable]	[Not Applicable]	[Not Applicable]	[Not Applicable]	NO	[Not Available]	[Not Available]	[Not Available]	[Not Available]	[Not Available]	[Not Available]	[Not Available]	[Not Available]	[Not Available]	[Not Available]	[Not Available]	[Not Available]	4	No	1964	2003	40	[Not Available]	Dead	[Not Available]	[Not Available]	[Not Available]	[Not Available]
TCGA-95-7562	6/13/12	Lung Adenocarcinoma	YES	NO	Male	Lung	BLACK OR AFRICAN AMERICAN	NOT HISPANIC OR LATINO	[Not Available]	Yes, History of Prior Malignancy	R-Lower	[Not Available]	2011	[Not Available]	[Not Available]	RX	7th	T2a	N1	M0	Stage IIA	[Not Applicable]	[Not Applicable]	[Not Applicable]	[Not Applicable]	YES	80	90	76	72	57	[Not Available]	[Not Available]	[Not Available]	[Not Available]	[Not Available]	[Not Available]	[Not Available]	3	No	1973	1983	10	[Not Available]	Dead	1	Post-Adjuvant Therapy	NO	[Not Available]
TCGA-95-7567	1/31/12	Lung Adenocarcinoma	YES	NO	Male	Lung	WHITE	NOT HISPANIC OR LATINO	[Not Available]	No	R-Upper	[Not Available]	2011	[Not Available]	[Not Available]	[Not Available]	7th	T2b	N1	M0	Stage IIB	[Not Applicable]	[Not Applicable]	[Not Applicable]	[Not Applicable]	NO	[Not Available]	[Not Available]	[Not Available]	[Not Available]	[Not Available]	[Not Available]	[Not Available]	[Not Available]	[Not Available]	[Not Available]	[Not Available]	[Not Available]	4	No	1970	2011	[Not Available]	[Not Available]	Alive	1	Post-Adjuvant Therapy	[Not Available]	[Not Available]
TCGA-95-7944	3/21/12	Lung Adenocarcinoma	YES	NO	Male	Lung	WHITE	NOT HISPANIC OR LATINO	[Not Available]	No	L-Lower	[Not Available]	2011	[Not Available]	[Not Available]	R0	7th	T1a	N0	M0	Stage IA	[Not Applicable]	[Not Applicable]	[Not Applicable]	[Not Applicable]	YES	86	87	[Not Available]	[Not Available]	60	[Not Available]	[Not Available]	[Not Available]	[Not Available]	[Not Available]	[Not Available]	[Not Available]	2	No	1961	[Not Available]	50	[Not Available]	Alive	[Not Available]	[Not Available]	[Not Available]	[Not Available]
TCGA-95-7947	3/21/12	Lung Adenocarcinoma	YES	NO	Male	Lung	WHITE	NOT HISPANIC OR LATINO	[Not Available]	Yes	L-Upper	[Not Available]	2011	[Not Available]	[Not Available]	R0	7th	T1a	N0	M0	Stage IA	[Not Applicable]	[Not Applicable]	[Not Applicable]	[Not Applicable]	YES	37	37	[Not Available]	[Not Available]	[Not Available]	[Not Available]	[Not Available]	[Not Available]	[Not Available]	[Not Available]	[Not Available]	[Not Available]	4	No	1956	2006	100	[Not Available]	Alive	[Not Available]	[Not Available]	[Not Available]	[Not Available]
TCGA-95-7948	3/22/12	Lung Adenocarcinoma	YES	NO	Female	Lung	WHITE	NOT HISPANIC OR LATINO	[Not Available]	Yes	R-Lower	[Not Available]	2011	[Not Available]	[Not Available]	R0	7th	T2a	N0	M0	Stage IB	[Not Applicable]	[Not Applicable]	[Not Applicable]	[Not Applicable]	YES	72	79	[Not Available]	[Not Available]	87	[Not Available]	[Not Available]	[Not Available]	[Not Available]	[Not Available]	[Not Available]	[Not Available]	3	No	1993	1995	0.15	[Not Available]	Alive	[Not Available]	[Not Available]	[Not Available]	[Not Available]
TCGA-95-8039	6/20/12	Lung Adenocarcinoma	YES	NO	Male	Lung	WHITE	NOT HISPANIC OR LATINO	[Not Available]	No	R-Upper	[Not Available]	2012	[Not Available]	[Not Available]	RX	7th	T1	N0	MX	Stage IA	[Not Applicable]	[Not Applicable]	[Not Applicable]	[Not Applicable]	YES	2.4	2.54	67	70	98	[Not Available]	[Not Available]	[Not Available]	[Not Available]	[Not Available]	[Not Available]	[Not Available]	1	No	[Not Available]	[Not Available]	[Not Available]	[Not Available]	Alive	[Not Available]	[Not Available]	NO	[Not Available]
TCGA-95-8494	8/30/12	Lung Adenocarcinoma	YES	NO	Male	Lung	WHITE	NOT HISPANIC OR LATINO	[Not Available]	No	R-Middle	[Not Available]	2012	[Not Available]	[Not Available]	[Not Available]	7th	T2a	N1	M0	Stage IIA	[Not Applicable]	[Not Applicable]	[Not Applicable]	[Not Applicable]	NO	[Not Available]	[Not Available]	[Not Available]	[Not Available]	[Not Available]	NO	[Not Available]	[Not Available]	NO	[Not Available]	NO	[Not Available]	5	No	[Not Available]	[Not Available]	[Not Available]	[Not Available]	Alive	[Not Available]	[Not Available]	NO	[Not Available]
TCGA-95-A4VK	2/21/13	Lung Adenocarcinoma	YES	NO	Female	Lung	WHITE	NOT HISPANIC OR LATINO	[Not Available]	Yes, History of Prior Malignancy	R-Upper	[Not Available]	2012	[Not Available]	[Not Available]	RX	7th	T2b	N2	M0	Stage IIIA	[Not Applicable]	[Not Applicable]	[Not Applicable]	[Not Applicable]	YES	99	99	67	72	81	NO	[Not Available]	[Not Available]	YES	[Not Available]	NO	[Not Available]	3	No	1956	1986	45	[Not Available]	Alive	[Not Available]	[Not Available]	YES	[Not Available]
TCGA-95-A4VN	2/22/13	Lung Adenocarcinoma	YES	NO	Female	Lung	WHITE	NOT HISPANIC OR LATINO	[Not Available]	Yes, History of Prior Malignancy	R-Lower	[Not Available]	2012	[Not Available]	[Not Available]	R0	7th	T2a	N1	M0	Stage IIA	[Not Applicable]	[Not Applicable]	[Not Applicable]	[Not Applicable]	YES	58	67	60	65	50	NO	[Not Available]	[Not Available]	YES	[Not Available]	NO	[Not Available]	4	No	1965	2007	42	[Not Available]	Alive	[Not Available]	[Not Available]	NO	[Not Available]
TCGA-95-A4VP	2/22/13	Lung Adenocarcinoma	YES	NO	Female	Lung	WHITE	[Not Available]	[Not Available]	No	L-Lower	[Not Available]	2012	[Not Available]	[Not Available]	[Not Available]	7th	T2b	N2	M0	Stage IIIA	[Not Applicable]	[Not Applicable]	[Not Applicable]	[Not Applicable]	NO	[Not Available]	[Not Available]	[Not Available]	[Not Available]	[Not Available]	NO	[Not Available]	[Not Available]	NO	[Not Available]	NO	[Not Available]	4	No	1972	2012	20	[Not Available]	Alive	[Not Available]	[Not Available]	NO	[Not Available]
TCGA-97-7546	11/17/11	Lung Adenocarcinoma	NO	YES	Female	Lung	WHITE	NOT HISPANIC OR LATINO	[Not Available]	No	L-Upper	[Not Available]	2008	[Not Available]	[Not Available]	R0	6th	T1	N0	MX	Stage IA	[Not Applicable]	[Not Applicable]	[Not Applicable]	[Not Applicable]	YES	85	84	100	96	60	[Not Available]	[Not Available]	[Not Available]	[Not Available]	[Not Available]	[Not Available]	[Not Available]	3	No	1963	1983	25	[Not Available]	Alive	[Not Available]	[Not Available]	[Not Available]	[Not Available]
TCGA-97-7547	11/17/11	Lung Adenocarcinoma	NO	YES	Female	Lung	WHITE	NOT HISPANIC OR LATINO	[Not Available]	No	R-Upper	[Not Available]	2007	[Not Available]	[Not Available]	[Not Available]	6th	T2	N0	MX	Stage IB	[Not Applicable]	[Not Applicable]	[Not Applicable]	[Not Applicable]	YES	106	101	82	83	94	[Not Available]	[Not Available]	[Not Available]	[Not Available]	[Not Available]	[Not Available]	[Not Available]	3	No	[Not Available]	1986	30	[Not Available]	Alive	[Not Available]	[Not Available]	[Not Available]	[Not Available]
TCGA-97-7552	11/17/11	Lung Adenocarcinoma	NO	YES	Male	Lung	WHITE	NOT HISPANIC OR LATINO	[Not Available]	No	L-Lower	[Not Available]	2007	[Not Available]	[Not Available]	[Not Available]	6th	T2	N0	MX	Stage IB	[Not Applicable]	[Not Applicable]	[Not Applicable]	[Not Applicable]	YES	81	[Not Available]	82	[Not Available]	[Not Available]	[Not Available]	[Not Available]	[Not Available]	[Not Available]	[Not Available]	[Not Available]	[Not Available]	3	No	[Not Available]	1985	40	[Not Available]	Alive	[Not Available]	[Not Available]	[Not Available]	[Not Available]
TCGA-97-7553	11/17/11	Lung Adenocarcinoma	NO	YES	Female	Lung	WHITE	NOT HISPANIC OR LATINO	[Not Available]	No	L-Lower	Central Lung	2007	[Not Available]	[Not Available]	[Not Available]	6th	T1	N0	MX	Stage IA	[Not Applicable]	[Not Applicable]	[Not Applicable]	[Not Applicable]	YES	99	99	70	70	64	[Not Available]	[Not Available]	[Not Available]	[Not Available]	[Not Available]	[Not Available]	[Not Available]	2	No	1967	[Not Available]	20	[Not Available]	Alive	[Not Available]	[Not Available]	[Not Available]	[Not Available]
TCGA-97-7554	11/17/11	Lung Adenocarcinoma	NO	YES	Female	Lung	WHITE	NOT HISPANIC OR LATINO	[Not Available]	No	L-Lower	[Not Available]	2010	[Not Available]	[Not Available]	R0	7th	T2a	N2	M0	Stage IIIA	[Not Applicable]	[Not Applicable]	[Not Applicable]	[Not Applicable]	YES	68	75	76	75	53	YES	YES	G12V	[Not Available]	[Not Available]	[Not Available]	[Not Available]	3	No	1945	1983	30	[Not Available]	Alive	0	Preoperative	[Not Available]	[Not Available]
TCGA-97-7937	2/13/12	Lung Adenocarcinoma	YES	NO	Male	Lung	WHITE	NOT HISPANIC OR LATINO	[Not Available]	No	L-Upper	[Not Available]	2011	[Not Available]	[Not Available]	[Not Available]	7th	T2a	N0	MX	Stage IB	[Not Applicable]	[Not Applicable]	[Not Applicable]	[Not Applicable]	YES	120	[Not Available]	77	[Not Available]	89	YES	NO	[Not Available]	YES	[Not Available]	YES	FISH	3	No	[Not Available]	1994	35	[Not Available]	Alive	0	Preoperative	[Not Available]	[Not Available]
TCGA-97-7938	2/13/12	Lung Adenocarcinoma	YES	NO	Female	Lung	WHITE	NOT HISPANIC OR LATINO	[Not Available]	No	R-Upper	[Not Available]	2011	[Not Available]	[Not Available]	R0	7th	T1a	N0	MX	Stage IA	[Not Applicable]	[Not Applicable]	[Not Applicable]	[Not Applicable]	YES	50	54	58	59	53	YES	YES	G12C	YES	[Not Available]	NO	[Not Available]	3	No	[Not Available]	1996	40	[Not Available]	Dead	[Not Available]	[Not Available]	[Not Available]	[Not Available]
TCGA-97-7941	2/13/12	Lung Adenocarcinoma	YES	NO	Female	Lung	WHITE	NOT HISPANIC OR LATINO	[Not Available]	No	L-Upper	[Not Available]	2011	[Not Available]	[Not Available]	R0	7th	T1b	N0	MX	Stage IA	[Not Applicable]	[Not Applicable]	[Not Applicable]	[Not Applicable]	YES	97	98	94	81	57	YES	YES	G12A	YES	[Not Available]	NO	[Not Available]	3	No	1960	1985	22.5	[Not Available]	Alive	0	Preoperative	[Not Available]	[Not Available]
TCGA-97-8171	6/13/12	Lung Adenocarcinoma	YES	NO	Male	Lung	ASIAN	NOT HISPANIC OR LATINO	[Not Available]	No	Other (please specify)	[Not Available]	2011	[Not Available]	[Not Available]	[Not Available]	7th	T2a	N2	M1a	Stage IV	[Not Applicable]	[Not Applicable]	[Not Applicable]	[Not Applicable]	YES	99	104	55	55	110	YES	NO	[Not Available]	YES	Exon 19 Deletion	NO	[Not Available]	2	No	1946	[Not Available]	65	[Not Available]	Alive	1	Preoperative	[Not Available]	[Not Available]
TCGA-97-8172	6/13/12	Lung Adenocarcinoma	YES	NO	Female	Lung	WHITE	NOT HISPANIC OR LATINO	[Not Available]	Yes, History of Prior Malignancy	R-Upper	[Not Available]	2011	[Not Available]	[Not Available]	[Not Available]	7th	T2a	N0	M0	Stage IB	[Not Applicable]	[Not Applicable]	[Not Applicable]	[Not Applicable]	YES	104.64	107.25	93.27	105.1	64.98	YES	YES	G12V	YES	[Not Available]	NO	[Not Available]	3	No	1961	1981	20	[Not Available]	Alive	1	Preoperative	NO	[Not Available]
TCGA-97-8174	6/13/12	Lung Adenocarcinoma	YES	NO	Male	Lung	WHITE	NOT HISPANIC OR LATINO	[Not Available]	No	R-Upper	[Not Available]	2011	[Not Available]	[Not Available]	[Not Available]	7th	T2b	N0	M0	Stage IIA	[Not Applicable]	[Not Applicable]	[Not Applicable]	[Not Applicable]	YES	91	99	81	86	90	YES	NO	[Not Available]	YES	[Not Available]	YES	FISH	3	No	1965	1985	40	[Not Available]	Dead	0	Preoperative	NO	[Not Available]
TCGA-97-8175	6/13/12	Lung Adenocarcinoma	YES	NO	Female	Lung	WHITE	NOT HISPANIC OR LATINO	[Not Available]	No	L-Upper	Peripheral Lung	2011	[Not Available]	[Not Available]	[Not Available]	7th	T2a	N0	M0	Stage IB	[Not Applicable]	[Not Applicable]	[Not Applicable]	[Not Applicable]	NO	[Not Available]	[Not Available]	[Not Available]	[Not Available]	[Not Available]	YES	NO	[Not Available]	YES	[Not Available]	YES	FISH	3	No	[Not Available]	1981	[Not Available]	[Not Available]	Alive	[Not Available]	[Not Available]	NO	[Not Available]
TCGA-97-8176	2010-05-12	Lung Adenocarcinoma	YES	NO	Male	Lung	WHITE	NOT HISPANIC OR LATINO	[Not Available]	No	R-Lower	[Not Available]	2012	[Not Available]	[Not Available]	R0	7th	T3	N1	M0	Stage IIIA	[Not Applicable]	[Not Applicable]	[Not Applicable]	[Not Applicable]	YES	100	104	67	68	61	YES	YES	G12S	YES	[Not Available]	NO	[Not Available]	4	No	1971	2011	40	[Not Available]	Dead	0	Preoperative	YES	[Not Available]
TCGA-97-8177	6/13/12	Lung Adenocarcinoma	YES	NO	Female	Lung	WHITE	NOT HISPANIC OR LATINO	[Not Available]	No	L-Lower	[Not Available]	2012	[Not Available]	[Not Available]	[Not Available]	7th	T2a	N0	M0	Stage IB	[Not Applicable]	[Not Applicable]	[Not Applicable]	[Not Applicable]	YES	106	109	80	82	97	YES	NO	[Not Available]	YES	L858R	NO	[Not Available]	1	No	[Not Available]	[Not Available]	[Not Available]	[Not Available]	Alive	0	Preoperative	NO	[Not Available]
TCGA-97-8179	6/13/12	Lung Adenocarcinoma	YES	NO	Male	Lung	WHITE	NOT HISPANIC OR LATINO	[Not Available]	No	R-Upper	[Not Available]	2012	[Not Available]	[Not Available]	[Not Available]	7th	T1a	N0	M0	Stage IA	[Not Applicable]	[Not Applicable]	[Not Applicable]	[Not Applicable]	YES	90	95	86	91	73	YES	NO	[Not Available]	YES	[Not Available]	YES	FISH	3	No	1958	1988	60	[Not Available]	Alive	0	Preoperative	NO	[Not Available]
TCGA-97-8547	9/27/12	Lung Adenocarcinoma	YES	NO	Female	Lung	[Not Available]	[Not Available]	[Not Available]	No	R-Lower	[Not Available]	2012	[Not Available]	[Not Available]	[Not Available]	7th	T2a	N2	MX	Stage IIIA	[Not Applicable]	[Not Applicable]	[Not Applicable]	[Not Applicable]	YES	136	[Not Available]	[Not Available]	[Not Available]	87	YES	NO	[Not Available]	YES	Exon 19 Deletion	NO	[Not Available]	1	No	[Not Available]	[Not Available]	[Not Available]	[Not Available]	Alive	[Not Available]	[Not Available]	NO	[Not Available]
TCGA-97-8552	9/26/12	Lung Adenocarcinoma	YES	NO	Female	Lung	WHITE	NOT HISPANIC OR LATINO	[Not Available]	No	L-Lower	[Not Available]	2012	[Not Available]	[Not Available]	[Not Available]	7th	T1a	N0	MX	Stage I	[Not Applicable]	[Not Applicable]	[Not Applicable]	[Not Applicable]	YES	95	[Not Available]	77	[Not Available]	75	YES	NO	[Not Available]	YES	Exon 19 Deletion	NO	[Not Available]	1	No	[Not Available]	[Not Available]	[Not Available]	[Not Available]	Alive	0	Preoperative	NO	[Not Available]
TCGA-97-A4LX	2003-07-13	Lung Adenocarcinoma	YES	NO	Male	Lung	WHITE	NOT HISPANIC OR LATINO	[Not Available]	Yes, History of Synchronous/Bilateral Malignancy	Other (please specify)	[Not Available]	2012	[Not Available]	[Not Available]	[Not Available]	7th	T2a	N0	M0	Stage IB	[Not Applicable]	[Not Applicable]	[Not Applicable]	[Not Applicable]	YES	91	90	91	96	61	YES	YES	G12A	NO	[Not Available]	NO	[Not Available]	3	No	1945	1985	120	[Not Available]	Alive	1	Preoperative	NO	[Not Available]
TCGA-97-A4M0	2003-07-13	Lung Adenocarcinoma	YES	NO	Female	Lung	WHITE	NOT HISPANIC OR LATINO	[Not Available]	No	R-Upper	[Not Available]	2012	[Not Available]	[Not Available]	[Not Available]	7th	T2a	N0	M0	Stage IB	[Not Applicable]	[Not Applicable]	[Not Applicable]	[Not Applicable]	YES	97	[Not Available]	90	[Not Available]	[Not Available]	YES	YES	G12C	NO	[Not Available]	NO	[Not Available]	4	No	1970	2004	34	[Not Available]	Alive	0	Preoperative	NO	[Not Available]
TCGA-97-A4M1	2003-07-13	Lung Adenocarcinoma	YES	NO	Female	Lung	WHITE	NOT HISPANIC OR LATINO	[Not Available]	No	R-Upper	[Not Available]	2012	[Not Available]	[Not Available]	[Not Available]	7th	T1a	N0	M0	Stage IA	[Not Applicable]	[Not Applicable]	[Not Applicable]	[Not Applicable]	YES	100	105	87	92	111	NO	[Not Available]	[Not Available]	NO	[Not Available]	NO	[Not Available]	3	No	1972	1975	3	[Not Available]	Alive	0	Preoperative	NO	[Not Available]
TCGA-97-A4M2	2003-07-13	Lung Adenocarcinoma	YES	NO	Male	Lung	WHITE	NOT HISPANIC OR LATINO	[Not Available]	Yes, History of Prior Malignancy	R-Middle	[Not Available]	2012	[Not Available]	[Not Available]	R0	7th	T1a	N0	M0	Stage IA	[Not Applicable]	[Not Applicable]	[Not Applicable]	[Not Applicable]	YES	102	103	96	89	91	YES	NO	[Not Available]	NO	[Not Available]	NO	[Not Available]	2	No	1972	[Not Available]	100	[Not Available]	Alive	1	Preoperative	NO	[Not Available]
TCGA-97-A4M3	2003-07-13	Lung Adenocarcinoma	YES	NO	Female	Lung	WHITE	NOT HISPANIC OR LATINO	[Not Available]	Yes, History of Prior Malignancy	R-Upper	[Not Available]	2012	[Not Available]	[Not Available]	[Not Available]	7th	T1b	N0	M0	Stage IA	[Not Applicable]	[Not Applicable]	[Not Applicable]	[Not Applicable]	YES	61	73	61	69	106	YES	NO	[Not Available]	NO	[Not Available]	NO	[Not Available]	3	No	1959	1984	37.5	[Not Available]	Alive	1	Preoperative	NO	[Not Available]
TCGA-97-A4M5	2003-07-13	Lung Adenocarcinoma	YES	NO	Male	Lung	WHITE	NOT HISPANIC OR LATINO	[Not Available]	No	R-Upper	[Not Available]	2012	[Not Available]	[Not Available]	[Not Available]	7th	T1b	N0	M0	Stage IA	[Not Applicable]	[Not Applicable]	[Not Applicable]	[Not Applicable]	YES	98	94	85	84	51	YES	YES	G12C	NO	[Not Available]	NO	[Not Available]	3	No	1952	1982	6	[Not Available]	Alive	[Not Available]	[Not Available]	NO	[Not Available]
TCGA-97-A4M6	2003-07-13	Lung Adenocarcinoma	YES	NO	Female	Lung	WHITE	NOT HISPANIC OR LATINO	[Not Available]	No	R-Lower	[Not Available]	2012	[Not Available]	[Not Available]	[Not Available]	7th	T1a	N0	M0	Stage IA	[Not Applicable]	[Not Applicable]	[Not Applicable]	[Not Applicable]	YES	110	116	95	95	92	YES	NO	[Not Available]	YES	Exon 19 Deletion	NO	[Not Available]	1	No	[Not Available]	[Not Available]	[Not Available]	[Not Available]	Alive	0	Preoperative	NO	[Not Available]
TCGA-97-A4M7	2003-07-13	Lung Adenocarcinoma	YES	NO	Male	Lung	WHITE	NOT HISPANIC OR LATINO	[Not Available]	Yes, History of Synchronous/Bilateral Malignancy	R-Middle	[Not Available]	2012	[Not Available]	[Not Available]	R0	7th	T1b	N0	M0	Stage IA	[Not Applicable]	[Not Applicable]	[Not Applicable]	[Not Applicable]	YES	91	101	74	82	99	YES	NO	[Not Available]	YES	L858R	NO	[Not Available]	3	No	1958	1978	40	[Not Available]	Alive	0	Preoperative	NO	[Not Available]
TCGA-99-7458	2001-06-12	Lung Adenocarcinoma	NO	YES	Female	Lung	WHITE	NOT HISPANIC OR LATINO	[Not Available]	No	R-Lower	[Not Available]	2010	[Not Available]	[Not Available]	R0	7th	T4	N0	M0	Stage IIIA	[Not Applicable]	[Not Applicable]	[Not Applicable]	[Not Applicable]	[Not Available]	[Not Available]	[Not Available]	[Not Available]	[Not Available]	[Not Available]	YES	YES	G12A	YES	[Not Available]	YES	RT-PCR	4	No	1958	2010	52	90	Alive	1	Preoperative	[Not Available]	[Not Available]
TCGA-99-8025	6/25/12	Lung Adenocarcinoma	NO	YES	Female	Lung	BLACK OR AFRICAN AMERICAN	NOT HISPANIC OR LATINO	[Not Available]	No	R-Upper	Central Lung	2010	[Not Available]	[Not Available]	R0	7th	T3	N2	M0	Stage IIIA	[Not Applicable]	[Not Applicable]	[Not Applicable]	[Not Applicable]	YES	111	[Not Available]	[Not Available]	[Not Available]	87	YES	NO	[Not Available]	YES	[Not Available]	YES	[Not Available]	4	No	1958	1998	20	[Not Available]	Alive	1	Preoperative	NO	[Not Available]
TCGA-99-8028	6/15/12	Lung Adenocarcinoma	NO	YES	Female	Lung	BLACK OR AFRICAN AMERICAN	NOT HISPANIC OR LATINO	[Not Available]	No	L-Upper	[Not Available]	2011	[Not Available]	[Not Available]	R0	7th	T1a	N0	M0	Stage IA	[Not Applicable]	[Not Applicable]	[Not Applicable]	[Not Applicable]	YES	94	98	91	91	71	YES	YES	G12C	YES	[Not Available]	YES	RT-PCR	4	No	1981	2011	30	[Not Available]	Alive	0	Preoperative	NO	[Not Available]
TCGA-99-8032	6/15/12	Lung Adenocarcinoma	YES	NO	Male	Lung	WHITE	NOT HISPANIC OR LATINO	[Not Available]	No	R-Upper	[Not Available]	2011	[Not Available]	[Not Available]	R0	7th	T1a	N0	M0	Stage IA	[Not Applicable]	[Not Applicable]	[Not Applicable]	[Not Applicable]	YES	59	[Not Available]	55	[Not Available]	54	YES	YES	G12C	YES	[Not Available]	NO	[Not Available]	2	No	1966	[Not Available]	90	[Not Available]	Alive	0	Preoperative	NO	[Not Available]
TCGA-99-8033	6/18/12	Lung Adenocarcinoma	YES	NO	Female	Lung	WHITE	NOT HISPANIC OR LATINO	[Not Available]	No	R-Upper	Peripheral Lung	2011	[Not Available]	[Not Available]	R0	7th	TX	NX	M1	Stage IV	[Not Applicable]	[Not Applicable]	[Not Applicable]	[Not Applicable]	NO	[Not Available]	[Not Available]	[Not Available]	[Not Available]	[Not Available]	YES	NO	[Not Available]	YES	[Not Available]	NO	[Not Available]	1	No	[Not Available]	[Not Available]	[Not Available]	[Not Available]	Dead	1	Preoperative	NO	[Not Available]
TCGA-99-AA5R	5/14/14	Lung Adenocarcinoma	YES	NO	Female	Lung	BLACK OR AFRICAN AMERICAN	NOT HISPANIC OR LATINO	[Not Available]	No	L-Lower	[Not Available]	2013	[Not Available]	[Not Available]	R0	7th	T1a	N0	M0	Stage IA	[Not Applicable]	[Not Applicable]	[Not Applicable]	[Not Applicable]	YES	64	[Not Available]	65	[Not Available]	47	YES	YES	G12C	YES	[Not Available]	YES	IHC	2	No	1967	[Not Available]	46	[Not Available]	Alive	1	Preoperative	NO	[Not Available]
TCGA-J2-8192	2006-06-12	Lung Adenocarcinoma	YES	NO	Female	Lung	WHITE	NOT HISPANIC OR LATINO	[Not Available]	Yes, History of Prior Malignancy	L-Upper	[Not Available]	2011	[Not Available]	[Not Available]	[Not Available]	7th	T2a	N1	MX	Stage IIA	[Not Applicable]	[Not Applicable]	[Not Applicable]	[Not Applicable]	YES	77	89	97	100	112	YES	NO	[Not Available]	YES	Exon 19 Deletion	NO	[Not Available]	1	No	[Not Available]	[Not Available]	[Not Available]	[Not Available]	Alive	[Not Available]	[Not Available]	NO	[Not Available]
TCGA-J2-8194	2006-06-12	Lung Adenocarcinoma	YES	NO	Female	Lung	WHITE	NOT HISPANIC OR LATINO	[Not Available]	Yes, History of Prior Malignancy	R-Lower	[Not Available]	2011	[Not Available]	[Not Available]	[Not Available]	7th	T3	N0	MX	Stage IIB	[Not Applicable]	[Not Applicable]	[Not Applicable]	[Not Applicable]	YES	83	83	2.04	2.04	59	[Not Available]	[Not Available]	[Not Available]	[Not Available]	[Not Available]	[Not Available]	[Not Available]	3	No	1956	1982	20	[Not Available]	Alive	[Not Available]	[Not Available]	NO	[Not Available]
TCGA-J2-A4AD	12/27/12	Lung Adenocarcinoma	YES	NO	Female	Lung	WHITE	NOT HISPANIC OR LATINO	[Not Available]	No	L-Upper	[Not Available]	2012	[Not Available]	[Not Available]	RX	7th	T1a	N0	MX	Stage IA	[Not Applicable]	[Not Applicable]	[Not Applicable]	[Not Applicable]	YES	1.95	[Not Available]	[Not Available]	[Not Available]	[Not Available]	NO	[Not Available]	[Not Available]	NO	[Not Available]	NO	[Not Available]	2	No	1970	[Not Available]	120	[Not Available]	Dead	[Not Available]	[Not Available]	NO	[Not Available]
TCGA-J2-A4AE	12/27/12	Lung Adenocarcinoma	YES	NO	Female	Lung	WHITE	NOT HISPANIC OR LATINO	[Not Available]	No	L-Upper	[Not Available]	2012	[Not Available]	[Not Available]	R0	7th	T1a	N0	MX	Stage IA	[Not Applicable]	[Not Applicable]	[Not Applicable]	[Not Applicable]	YES	92	[Not Available]	0.72	[Not Available]	89	NO	[Not Available]	[Not Available]	NO	[Not Available]	NO	[Not Available]	1	No	[Not Available]	[Not Available]	[Not Available]	[Not Available]	Alive	[Not Available]	[Not Available]	NO	[Not Available]
TCGA-J2-A4AG	12/27/12	Lung Adenocarcinoma	YES	NO	Female	Lung	WHITE	NOT HISPANIC OR LATINO	[Not Available]	No	L-Upper	[Not Available]	2012	[Not Available]	[Not Available]	R0	7th	T1b	N0	MX	Stage IA	[Not Applicable]	[Not Applicable]	[Not Applicable]	[Not Applicable]	NO	[Not Available]	[Not Available]	[Not Available]	[Not Available]	[Not Available]	NO	[Not Available]	[Not Available]	NO	[Not Available]	NO	[Not Available]	3	No	1956	1981	25	[Not Available]	Alive	[Not Available]	[Not Available]	NO	[Not Available]
TCGA-L4-A4E5	2012-05-12	Lung Adenocarcinoma	NO	YES	Female	Lung	WHITE	NOT HISPANIC OR LATINO	[Not Available]	No	L-Upper	Central Lung	2012	[Not Available]	[Not Available]	R0	7th	T1	N0	M0	Stage I	[Not Applicable]	[Not Applicable]	[Not Applicable]	[Not Applicable]	YES	82	82	94	94	93	NO	[Not Available]	[Not Available]	NO	[Not Available]	NO	[Not Available]	4	No	1979	2012	33	[Not Available]	Alive	1	Preoperative	NO	[Not Available]
TCGA-L4-A4E6	2012-05-12	Lung Adenocarcinoma	NO	YES	Male	Lung	WHITE	NOT HISPANIC OR LATINO	[Not Available]	No	R-Upper	Peripheral Lung	2012	[Not Available]	[Not Available]	R0	7th	T1	N0	M0	Stage IA	[Not Applicable]	[Not Applicable]	[Not Applicable]	[Not Applicable]	YES	69	85	84	82	98	NO	[Not Available]	[Not Available]	NO	[Not Available]	NO	[Not Available]	3	No	1954	1984	30	[Not Available]	Alive	[Not Available]	[Not Available]	NO	[Not Available]
TCGA-L9-A443	10/26/12	Lung Adenocarcinoma	YES	NO	Female	Lung	WHITE	NOT HISPANIC OR LATINO	[Not Available]	Yes, History of Prior Malignancy	L-Lower	Central Lung	2012	[Not Available]	[Not Available]	R0	7th	T1a	N0	MX	Stage IA	[Not Applicable]	[Not Applicable]	[Not Applicable]	[Not Applicable]	YES	[Not Available]	69	[Not Available]	74	61	NO	[Not Available]	[Not Available]	NO	[Not Available]	NO	[Not Available]	4	No	1960	2005	90	[Not Available]	Dead	1	Preoperative	NO	[Not Available]
TCGA-L9-A444	10/26/12	Lung Adenocarcinoma	YES	NO	Female	Lung	WHITE	NOT HISPANIC OR LATINO	[Not Available]	Yes, History of Prior Malignancy	R-Upper	Central Lung	2012	[Not Available]	[Not Available]	R0	7th	T1a	N0	MX	Stage IA	[Not Applicable]	[Not Applicable]	[Not Applicable]	[Not Applicable]	YES	49	54	58	62	57	NO	[Not Available]	[Not Available]	NO	[Not Available]	NO	[Not Available]	2	No	1972	[Not Available]	10	[Not Available]	Alive	0	Preoperative	NO	[Not Available]
TCGA-L9-A50W	2003-08-13	Lung Adenocarcinoma	YES	NO	Male	Lung	BLACK OR AFRICAN AMERICAN	NOT HISPANIC OR LATINO	[Not Available]	No	L-Lower	[Not Available]	2012	[Not Available]	[Not Available]	R0	7th	T1b	N1	MX	Stage IIA	[Not Applicable]	[Not Applicable]	[Not Applicable]	[Not Applicable]	YES	81	[Not Available]	103	[Not Available]	[Not Available]	NO	[Not Available]	[Not Available]	YES	T790M	YES	FISH	3	No	1967	1986	19	[Not Available]	Dead	0	Preoperative	NO	[Not Available]
TCGA-L9-A5IP	5/14/13	Lung Adenocarcinoma	YES	NO	Female	Lung	BLACK OR AFRICAN AMERICAN	NOT HISPANIC OR LATINO	[Not Available]	No	R-Upper	[Not Available]	2012	[Not Available]	[Not Available]	R1	7th	T3	N2	M1b	Stage IV	[Not Applicable]	[Not Applicable]	[Not Applicable]	[Not Applicable]	NO	[Not Available]	[Not Available]	[Not Available]	[Not Available]	[Not Available]	NO	[Not Available]	[Not Available]	YES	[Not Available]	YES	FISH	4	No	[Not Available]	2012	[Not Available]	[Not Available]	Dead	[Not Available]	[Not Available]	NO	[Not Available]
TCGA-L9-A743	4/14/14	Lung Adenocarcinoma	YES	NO	Male	Lung	BLACK OR AFRICAN AMERICAN	NOT HISPANIC OR LATINO	[Not Available]	Yes, History of Prior Malignancy	L-Upper	Central Lung	2013	[Not Available]	[Not Available]	R0	7th	T2a	N1	M0	Stage IIA	[Not Applicable]	[Not Applicable]	[Not Applicable]	[Not Applicable]	YES	88	78	85	81	45	NO	[Not Available]	[Not Available]	NO	[Not Available]	NO	[Not Available]	2	No	1986	[Not Available]	40.5	[Not Available]	Alive	0	Preoperative	NO	[Not Available]
TCGA-L9-A7SV	2001-07-14	Lung Adenocarcinoma	YES	NO	Male	Lung	BLACK OR AFRICAN AMERICAN	NOT HISPANIC OR LATINO	[Not Available]	No	L-Lower	[Not Available]	2013	[Not Available]	[Not Available]	R0	7th	T2a	N1	M0	Stage IIA	[Not Applicable]	[Not Applicable]	[Not Applicable]	[Not Applicable]	YES	40	45	38	40	55	NO	[Not Available]	[Not Available]	NO	[Not Available]	NO	[Not Available]	3	No	1959	1990	93	[Not Available]	Alive	0	Preoperative	NO	[Not Available]
TCGA-L9-A8F4	2/14/14	Lung Adenocarcinoma	YES	NO	Female	Lung	BLACK OR AFRICAN AMERICAN	NOT HISPANIC OR LATINO	[Not Available]	No	L-Upper	[Not Available]	2013	[Not Available]	[Not Available]	R0	7th	T2a	N0	MX	Stage IB	[Not Applicable]	[Not Applicable]	[Not Applicable]	[Not Applicable]	YES	53	54	45	48	35	NO	[Not Available]	[Not Available]	NO	[Not Available]	NO	[Not Available]	2	No	1973	[Not Available]	14	[Not Available]	Alive	0	Preoperative	YES	[Not Available]
TCGA-MN-A4N1	2012-04-12	Lung Adenocarcinoma	NO	YES	Male	Lung	BLACK OR AFRICAN AMERICAN	NOT HISPANIC OR LATINO	[Not Available]	Yes, History of Prior Malignancy	R-Upper	[Not Available]	2011	[Not Available]	[Not Available]	R0	7th	T2a	N1	M0	Stage IIA	[Not Applicable]	[Not Applicable]	[Not Applicable]	[Not Applicable]	YES	117	[Not Available]	74	[Not Available]	55	NO	[Not Available]	[Not Available]	YES	[Not Available]	YES	IHC	2	No	1967	[Not Available]	[Not Available]	100	Alive	0	Preoperative	NO	[Not Available]
TCGA-MN-A4N4	2012-04-12	Lung Adenocarcinoma	NO	YES	Male	Lung	WHITE	NOT HISPANIC OR LATINO	[Not Available]	No	L-Upper	[Not Available]	2010	[Not Available]	[Not Available]	R0	7th	T1b	N0	M0	Stage IA	[Not Applicable]	[Not Applicable]	[Not Applicable]	[Not Applicable]	YES	77	82	70	75	[Not Available]	NO	[Not Available]	[Not Available]	NO	[Not Available]	NO	[Not Available]	2	No	1980	[Not Available]	[Not Available]	100	Alive	1	Preoperative	NO	[Not Available]
TCGA-MN-A4N5	2012-04-12	Lung Adenocarcinoma	NO	YES	Male	Lung	WHITE	NOT HISPANIC OR LATINO	[Not Available]	No	L-Upper	[Not Available]	2011	[Not Available]	[Not Available]	R0	7th	T1a	N0	M0	Stage IA	[Not Applicable]	[Not Applicable]	[Not Applicable]	[Not Applicable]	YES	105	[Not Available]	77	[Not Available]	82	NO	[Not Available]	[Not Available]	YES	[Not Available]	YES	IHC	4	No	1971	2011	[Not Available]	100	Alive	0	Preoperative	NO	[Not Available]
TCGA-MP-A4SV	2004-02-13	Lung Adenocarcinoma	NO	YES	Male	Lung	[Not Available]	[Not Available]	[Not Available]	No	L-Lower	[Not Available]	2001	[Not Available]	[Not Available]	R0	5th	T2	N0	M0	Stage IB	[Not Applicable]	[Not Applicable]	[Not Applicable]	[Not Applicable]	YES	62	78	[Not Available]	[Not Available]	48	NO	[Not Available]	[Not Available]	NO	[Not Available]	NO	[Not Available]	2	No	1946	[Not Available]	110	[Not Available]	Dead	[Not Available]	[Not Available]	NO	[Not Available]
TCGA-MP-A4SW	2004-02-13	Lung Adenocarcinoma	NO	YES	Male	Lung	WHITE	[Not Available]	[Not Available]	No	L-Upper	[Not Available]	2002	[Not Available]	[Not Available]	R0	5th	T2	N1	M0	Stage IIB	[Not Applicable]	[Not Applicable]	[Not Applicable]	[Not Applicable]	YES	90	101	[Not Available]	[Not Available]	102	NO	[Not Available]	[Not Available]	NO	[Not Available]	NO	[Not Available]	3	No	1967	1982	15	[Not Available]	Dead	[Not Available]	[Not Available]	NO	[Not Available]
TCGA-MP-A4SY	2004-02-13	Lung Adenocarcinoma	NO	YES	Male	Lung	WHITE	NOT HISPANIC OR LATINO	[Not Available]	No	R-Lower	Central Lung	2002	[Not Available]	[Not Available]	R0	5th	T2	N1	M0	Stage IIB	[Not Applicable]	[Not Applicable]	[Not Applicable]	[Not Applicable]	YES	54	74	[Not Available]	[Not Available]	73	NO	[Not Available]	[Not Available]	NO	[Not Available]	NO	[Not Available]	4	No	[Not Available]	2002	40	[Not Available]	Dead	0	Pre-Adjuvant Therapy	NO	[Not Available]
TCGA-MP-A4T2	2004-02-13	Lung Adenocarcinoma	NO	YES	Male	Lung	WHITE	NOT HISPANIC OR LATINO	[Not Available]	No	L-Lower	[Not Available]	2003	[Not Available]	[Not Available]	R0	6th	T1	N0	M0	Stage IA	[Not Applicable]	[Not Applicable]	[Not Applicable]	[Not Applicable]	YES	31	51	[Not Available]	[Not Available]	46	NO	[Not Available]	[Not Available]	NO	[Not Available]	NO	[Not Available]	4	No	1951	2001	75	[Not Available]	Dead	[Not Available]	[Not Available]	NO	[Not Available]
TCGA-MP-A4T4	2004-02-13	Lung Adenocarcinoma	NO	YES	Female	Lung	WHITE	[Not Available]	[Not Available]	No	R-Lower	[Not Available]	2004	[Not Available]	[Not Available]	R0	6th	T2	N1	M0	Stage IIB	[Not Applicable]	[Not Applicable]	[Not Applicable]	[Not Applicable]	YES	113	110	[Not Available]	[Not Available]	53	NO	[Not Available]	[Not Available]	NO	[Not Available]	NO	[Not Available]	2	No	1954	[Not Available]	50	[Not Available]	Dead	0	Preoperative	NO	[Not Available]
TCGA-MP-A4T6	2004-02-13	Lung Adenocarcinoma	NO	YES	Female	Lung	WHITE	NOT HISPANIC OR LATINO	[Not Available]	No	L-Lower	Peripheral Lung	2005	[Not Available]	[Not Available]	R0	6th	T1	N2	MX	Stage IIIA	[Not Applicable]	[Not Applicable]	[Not Applicable]	[Not Applicable]	YES	77	79	[Not Available]	[Not Available]	63	NO	[Not Available]	[Not Available]	NO	[Not Available]	NO	[Not Available]	3	No	[Not Available]	1989	50	[Not Available]	Dead	[Not Available]	[Not Available]	NO	[Not Available]
TCGA-MP-A4T7	2004-02-13	Lung Adenocarcinoma	NO	YES	Female	Lung	[Not Available]	[Not Available]	[Not Available]	No	R-Lower	[Not Available]	2005	[Not Available]	[Not Available]	R0	6th	T2	N0	M1	Stage IV	[Not Applicable]	[Not Applicable]	[Not Applicable]	[Not Applicable]	YES	87	91	[Not Available]	[Not Available]	57	NO	[Not Available]	[Not Available]	NO	[Not Available]	NO	[Not Available]	4	No	1954	2004	50	[Not Available]	Dead	[Not Available]	[Not Available]	NO	[Not Available]
TCGA-MP-A4T8	2004-02-13	Lung Adenocarcinoma	NO	YES	Male	Lung	[Not Available]	[Not Available]	[Not Available]	Yes, History of Prior Malignancy	L-Upper	[Not Available]	2006	[Not Available]	[Not Available]	R0	6th	T2	N2	M0	Stage IIIA	[Not Applicable]	[Not Applicable]	[Not Applicable]	[Not Applicable]	YES	60	72	[Not Available]	[Not Available]	102	NO	[Not Available]	[Not Available]	NO	[Not Available]	NO	[Not Available]	3	No	1957	1972	25	[Not Available]	Dead	1	Pre-Adjuvant Therapy	NO	[Not Available]
TCGA-MP-A4T9	2004-02-13	Lung Adenocarcinoma	NO	YES	Female	Lung	WHITE	NOT HISPANIC OR LATINO	[Not Available]	No	L-Upper	[Not Available]	2006	[Not Available]	[Not Available]	RX	6th	T2	N2	MX	Stage IIIA	[Not Applicable]	[Not Applicable]	[Not Applicable]	[Not Applicable]	YES	99	105	[Not Available]	[Not Available]	106	NO	[Not Available]	[Not Available]	NO	[Not Available]	NO	[Not Available]	4	No	1980	2004	24	[Not Available]	Dead	[Not Available]	[Not Available]	YES	[Not Available]
TCGA-MP-A4TA	2004-02-13	Lung Adenocarcinoma	NO	YES	Female	Lung	WHITE	NOT HISPANIC OR LATINO	[Not Available]	Yes, History of Prior Malignancy	R-Upper	Peripheral Lung	2006	[Not Available]	[Not Available]	R0	6th	T1	N0	M0	Stage IA	[Not Applicable]	[Not Applicable]	[Not Applicable]	[Not Applicable]	YES	65	74	[Not Available]	[Not Available]	46	NO	[Not Available]	[Not Available]	NO	[Not Available]	NO	[Not Available]	4	No	1951	2006	55	[Not Available]	Dead	1	Pre-Adjuvant Therapy	NO	[Not Available]
TCGA-MP-A4TC	2004-02-13	Lung Adenocarcinoma	NO	YES	Male	Lung	WHITE	NOT HISPANIC OR LATINO	[Not Available]	Yes, History of Prior Malignancy	R-Middle	[Not Available]	2008	[Not Available]	[Not Available]	R0	6th	T1	N2	M0	Stage IIIA	[Not Applicable]	[Not Applicable]	[Not Applicable]	[Not Applicable]	YES	83	76	[Not Available]	[Not Available]	68	NO	[Not Available]	[Not Available]	NO	[Not Available]	NO	[Not Available]	3	No	1944	1976	125	[Not Available]	Dead	[Not Available]	[Not Available]	NO	[Not Available]
TCGA-MP-A4TD	2005-08-13	Lung Adenocarcinoma	NO	YES	Male	Lung	WHITE	[Not Available]	[Not Available]	Yes, History of Prior Malignancy	L-Lower	Peripheral Lung	2008	[Not Available]	[Not Available]	RX	6th	T2	N2	M0	Stage IIIA	[Not Applicable]	[Not Applicable]	[Not Applicable]	[Not Applicable]	YES	93	92	[Not Available]	[Not Available]	61	NO	[Not Available]	[Not Available]	NO	[Not Available]	NO	[Not Available]	3	No	[Not Available]	1990	20	[Not Available]	Dead	0	Post-Adjuvant Therapy	NO	[Not Available]
TCGA-MP-A4TE	2004-02-13	Lung Adenocarcinoma	NO	YES	Male	Lung	WHITE	NOT HISPANIC OR LATINO	[Not Available]	No	L-Lower	Peripheral Lung	2010	[Not Available]	[Not Available]	RX	7th	T2b	N0	MX	Stage IIA	[Not Applicable]	[Not Applicable]	[Not Applicable]	[Not Applicable]	NO	[Not Available]	[Not Available]	[Not Available]	[Not Available]	[Not Available]	YES	YES	G12C	NO	[Not Available]	NO	[Not Available]	4	No	1970	2010	40	[Not Available]	Dead	[Not Available]	[Not Available]	NO	[Not Available]
TCGA-MP-A4TF	2004-02-13	Lung Adenocarcinoma	NO	YES	Female	Lung	WHITE	NOT HISPANIC OR LATINO	[Not Available]	No	R-Upper	Peripheral Lung	2010	[Not Available]	[Not Available]	R0	7th	T2b	N0	M0	Stage IIA	[Not Applicable]	[Not Applicable]	[Not Applicable]	[Not Applicable]	YES	109	108	[Not Available]	[Not Available]	77	NO	[Not Available]	[Not Available]	NO	[Not Available]	NO	[Not Available]	4	No	1970	2010	40	[Not Available]	Dead	[Not Available]	[Not Available]	NO	[Not Available]
TCGA-MP-A4TH	2005-08-13	Lung Adenocarcinoma	YES	NO	Female	Lung	WHITE	NOT HISPANIC OR LATINO	[Not Available]	No	L-Lower	Peripheral Lung	2012	[Not Available]	[Not Available]	R0	7th	T1a	N0	M0	Stage IA	[Not Applicable]	[Not Applicable]	[Not Applicable]	[Not Applicable]	YES	115	115	110	117	73	NO	[Not Available]	[Not Available]	NO	[Not Available]	NO	[Not Available]	3	No	1962	1982	20	[Not Available]	Alive	[Not Available]	[Not Available]	NO	[Not Available]
TCGA-MP-A4TI	2004-02-13	Lung Adenocarcinoma	NO	YES	Male	Lung	WHITE	NOT HISPANIC OR LATINO	[Not Available]	No	R-Lower	[Not Available]	2010	[Not Available]	[Not Available]	R0	7th	T2a	N1	M0	Stage IIA	[Not Applicable]	[Not Applicable]	[Not Applicable]	[Not Applicable]	NO	[Not Available]	[Not Available]	[Not Available]	[Not Available]	[Not Available]	YES	YES	G12C	YES	[Not Available]	NO	[Not Available]	3	No	1955	1990	35	[Not Available]	Dead	[Not Available]	[Not Available]	[Not Available]	[Not Available]
TCGA-MP-A4TJ	2004-02-13	Lung Adenocarcinoma	NO	YES	Female	Lung	[Not Available]	[Not Available]	[Not Available]	No	R-Upper	Central Lung	2006	[Not Available]	[Not Available]	R0	6th	T1	N0	M0	Stage IA	[Not Applicable]	[Not Applicable]	[Not Applicable]	[Not Applicable]	YES	27	36	29.7	30.1	29	NO	[Not Available]	[Not Available]	NO	[Not Available]	NO	[Not Available]	2	No	[Not Available]	[Not Available]	[Not Available]	[Not Available]	Dead	[Not Available]	[Not Available]	NO	[Not Available]
TCGA-MP-A4TK	2004-02-13	Lung Adenocarcinoma	NO	YES	Female	Lung	[Not Available]	[Not Available]	[Not Available]	No	R-Lower	[Not Available]	2002	[Not Available]	[Not Available]	R0	5th	T2	N1	MX	Stage IIB	[Not Applicable]	[Not Applicable]	[Not Applicable]	[Not Applicable]	YES	57	64	[Not Available]	[Not Available]	88	NO	[Not Available]	[Not Available]	NO	[Not Available]	NO	[Not Available]	4	No	1971	1999	28	[Not Available]	Dead	[Not Available]	[Not Available]	NO	[Not Available]
TCGA-MP-A5C7	2005-10-13	Lung Adenocarcinoma	NO	YES	Female	Lung	WHITE	NOT HISPANIC OR LATINO	[Not Available]	No	L-Upper	Central Lung	2008	[Not Available]	[Not Available]	R0	6th	T2	N0	M0	Stage IB	[Not Applicable]	[Not Applicable]	[Not Applicable]	[Not Applicable]	YES	89	93	[Not Available]	[Not Available]	105	NO	[Not Available]	[Not Available]	NO	[Not Available]	NO	[Not Available]	3	No	1953	1968	15	[Not Available]	Alive	1	Pre-Adjuvant Therapy	NO	[Not Available]
TCGA-NJ-A4YF	4/25/13	Lung Adenocarcinoma	NO	YES	Female	Lung	BLACK OR AFRICAN AMERICAN	NOT HISPANIC OR LATINO	[Not Available]	No	R-Upper	[Not Available]	2007	[Not Available]	[Not Available]	[Not Available]	6th	T1	N0	M0	Stage IA	[Not Applicable]	[Not Applicable]	[Not Applicable]	[Not Applicable]	YES	80.7	83.9	96	95.1	77.5	NO	[Not Available]	[Not Available]	NO	[Not Available]	NO	[Not Available]	3	No	[Not Available]	[Not Available]	30	[Not Available]	Alive	[Not Available]	[Not Available]	[Not Available]	[Not Available]
TCGA-NJ-A4YG	4/26/13	Lung Adenocarcinoma	NO	YES	Male	Lung	WHITE	[Not Available]	[Not Available]	No	L-Upper	[Not Available]	2008	[Not Available]	[Not Available]	[Not Available]	6th	T2	N0	M0	Stage IB	[Not Applicable]	[Not Applicable]	[Not Applicable]	[Not Applicable]	NO	[Not Available]	[Not Available]	[Not Available]	[Not Available]	[Not Available]	[Not Available]	[Not Available]	[Not Available]	[Not Available]	[Not Available]	[Not Available]	[Not Available]	4	No	1955	2007	104	[Not Available]	Alive	[Not Available]	[Not Available]	NO	[Not Available]
TCGA-NJ-A4YI	4/24/13	Lung Adenocarcinoma	NO	YES	Female	Lung	WHITE	[Not Available]	[Not Available]	No	R-Upper	[Not Available]	2009	[Not Available]	[Not Available]	[Not Available]	6th	T2	N2	M0	Stage IIIA	[Not Applicable]	[Not Applicable]	[Not Applicable]	[Not Applicable]	YES	89	94	[Not Available]	[Not Available]	52	[Not Available]	[Not Available]	[Not Available]	[Not Available]	[Not Available]	[Not Available]	[Not Available]	3	No	1936	1976	3	[Not Available]	Dead	[Not Available]	[Not Available]	NO	[Not Available]
TCGA-NJ-A4YP	9/27/13	Lung Adenocarcinoma	[Not Available]	[Not Available]	Male	Lung	WHITE	NOT HISPANIC OR LATINO	[Not Available]	No	R-Lower	[Not Available]	2011	[Not Available]	[Not Available]	[Not Available]	7th	T2a	N0	M0	Stage IB	[Not Applicable]	[Not Applicable]	[Not Applicable]	[Not Applicable]	NO	[Not Available]	[Not Available]	[Not Available]	[Not Available]	[Not Available]	NO	[Not Available]	[Not Available]	NO	[Not Available]	NO	[Not Available]	5	No	[Not Available]	[Not Available]	60	[Not Available]	Alive	[Not Available]	[Not Available]	NO	[Not Available]
TCGA-NJ-A4YQ	9/27/13	Lung Adenocarcinoma	[Not Available]	[Not Available]	Female	Lung	WHITE	NOT HISPANIC OR LATINO	[Not Available]	No	L-Upper	[Not Available]	2011	[Not Available]	[Not Available]	RX	7th	T1b	N0	M0	Stage IA	[Not Applicable]	[Not Applicable]	[Not Applicable]	[Not Applicable]	NO	[Not Available]	[Not Available]	[Not Available]	[Not Available]	[Not Available]	NO	[Not Available]	[Not Available]	NO	[Not Available]	NO	[Not Available]	4	No	[Not Available]	2011	40	[Not Available]	Alive	[Not Available]	[Not Available]	NO	[Not Available]
TCGA-NJ-A55A	9/27/13	Lung Adenocarcinoma	[Not Available]	[Not Available]	Female	Lung	WHITE	NOT HISPANIC OR LATINO	[Not Available]	No	R-Lower	[Not Available]	2009	[Not Available]	[Not Available]	[Not Available]	6th	T2	N0	M0	Stage IB	[Not Applicable]	[Not Applicable]	[Not Applicable]	[Not Applicable]	NO	[Not Available]	[Not Available]	[Not Available]	[Not Available]	[Not Available]	NO	[Not Available]	[Not Available]	NO	[Not Available]	NO	[Not Available]	3	No	[Not Available]	1983	25	[Not Available]	Alive	[Not Available]	[Not Available]	NO	[Not Available]
TCGA-NJ-A55O	9/27/13	Lung Adenocarcinoma	[Not Available]	[Not Available]	Female	Lung	WHITE	NOT HISPANIC OR LATINO	[Not Available]	No	R-Upper	[Not Available]	2011	[Not Available]	[Not Available]	[Not Available]	7th	T1b	N1	M0	Stage IIA	[Not Applicable]	[Not Applicable]	[Not Applicable]	[Not Applicable]	NO	[Not Available]	[Not Available]	[Not Available]	[Not Available]	[Not Available]	NO	[Not Available]	[Not Available]	NO	[Not Available]	NO	[Not Available]	4	No	[Not Available]	2000	30	[Not Available]	Alive	[Not Available]	[Not Available]	NO	[Not Available]
TCGA-NJ-A55R	9/27/13	Lung Adenocarcinoma	[Not Available]	[Not Available]	Male	Lung	WHITE	NOT HISPANIC OR LATINO	[Not Available]	No	L-Upper	[Not Available]	2011	[Not Available]	[Not Available]	[Not Available]	7th	T1b	N0	MX	Stage IA	[Not Applicable]	[Not Applicable]	[Not Applicable]	[Not Applicable]	NO	[Not Available]	[Not Available]	[Not Available]	[Not Available]	[Not Available]	NO	[Not Available]	[Not Available]	NO	[Not Available]	NO	[Not Available]	3	No	[Not Available]	1986	5	[Not Available]	Alive	[Not Available]	[Not Available]	NO	[Not Available]
TCGA-NJ-A7XG	5/22/14	Lung Adenocarcinoma	[Not Available]	[Not Available]	Male	Lung	BLACK OR AFRICAN AMERICAN	NOT HISPANIC OR LATINO	[Not Available]	No	L-Upper	[Not Available]	2013	[Not Available]	[Not Available]	[Not Available]	7th	T4	N1	M0	Stage IIIA	[Not Applicable]	[Not Applicable]	[Not Applicable]	[Not Applicable]	NO	[Not Available]	[Not Available]	[Not Available]	[Not Available]	[Not Available]	YES	NO	[Not Available]	YES	Other	[Not Available]	[Not Available]	3	No	[Not Available]	[Not Available]	[Not Available]	[Not Available]	Alive	[Not Available]	[Not Available]	NO	[Not Available]
TCGA-O1-A52J	2004-11-13	Lung Adenocarcinoma	NO	YES	Female	Lung	WHITE	NOT HISPANIC OR LATINO	[Not Available]	No	L-Lower	[Not Available]	2007	[Not Available]	[Not Available]	[Not Available]	6th	T1	N0	MX	Stage IA	[Not Applicable]	[Not Applicable]	[Not Applicable]	[Not Applicable]	NO	[Not Available]	[Not Available]	[Not Available]	[Not Available]	[Not Available]	NO	[Not Available]	[Not Available]	NO	[Not Available]	NO	[Not Available]	3	No	1950	1980	45	[Not Available]	Dead	1	[Not Available]	NO	[Not Available]
TCGA-S2-AA1A	4/22/14	Lung Adenocarcinoma	YES	NO	Female	Lung	BLACK OR AFRICAN AMERICAN	NOT HISPANIC OR LATINO	[Not Available]	No	R-Upper	[Not Available]	2013	[Not Available]	[Not Available]	R0	7th	T1b	N0	M0	Stage IA	[Not Applicable]	[Not Applicable]	[Not Applicable]	[Not Applicable]	YES	2.01	2.16	79	83	65	NO	[Not Available]	[Not Available]	NO	[Not Available]	NO	[Not Available]	3	No	1957	1995	95	[Not Available]	Alive	[Not Available]	[Not Available]	NO	[Not Available]
[truncated: 29 more columns]
